# Supplementary material for: Oxygen-tolerant proton reduction catalysis: much O2 about nothing?
Source: Royal Society of Chemistry journal article supplement (doi:10.1039/c5ee01167a), 2015-01-01
Supplement: c5ee01167a1.xlsx [file c5ee01167a1.xlsx]

## Sheet: Figure 3 processed data 
Potential	Pt under N2	Pt under 21% O2
V vs. NHE	j / A cm-2	j / A cm-2		Experimental conditions
0.797	1.75951e-05	1.93733e-05		Scan rate	50 mV/s
0.796	1.75951e-05	1.93733e-05		Solution	0.1 M phosphate buffer
0.795	1.84842e-05	1.75951e-05		pH	7
0.794	1.75951e-05	1.75951e-05		Electrode (size)	Pt (1.5 mm diameter)
0.793	1.67061e-05	1.84842e-05		Atmosphere	N2 or 21 % O2
0.792	1.84842e-05	1.58171e-05
0.791	1.67061e-05	1.75951e-05
0.79	1.58171e-05	1.58171e-05
0.789	1.58171e-05	1.75951e-05
0.788	1.58171e-05	1.4928e-05
0.787	1.75951e-05	1.58171e-05
0.786	1.67061e-05	1.58171e-05
0.785	1.4928e-05	1.75951e-05
0.784	1.58171e-05	1.58171e-05
0.783	1.67061e-05	1.67061e-05
0.782	1.4928e-05	1.58171e-05
0.781	1.4928e-05	1.40389e-05
0.78	1.67061e-05	1.40389e-05
0.779	1.4928e-05	1.58171e-05
0.778	1.4928e-05	1.4928e-05
0.777	1.40389e-05	1.4928e-05
0.776	1.40389e-05	1.31498e-05
0.775	1.40389e-05	1.31498e-05
0.774	1.4928e-05	1.31498e-05
0.773	1.31498e-05	1.4928e-05
0.772	1.4928e-05	1.40389e-05
0.771	1.40389e-05	1.4928e-05
0.77	1.58171e-05	1.22608e-05
0.769	1.4928e-05	1.40389e-05
0.768	1.58171e-05	1.31498e-05
0.767	1.40389e-05	1.40389e-05
0.766	1.40389e-05	1.13718e-05
0.765	1.4928e-05	1.31498e-05
0.764	1.40389e-05	1.31498e-05
0.763	1.31498e-05	1.22608e-05
0.762	1.40389e-05	1.31498e-05
0.761	1.4928e-05	1.40389e-05
0.76	1.4928e-05	1.22608e-05
0.759	1.40389e-05	1.31498e-05
0.758	1.31498e-05	1.22608e-05
0.757	1.31498e-05	1.22608e-05
0.756	1.31498e-05	1.31498e-05
0.755	1.40389e-05	1.31498e-05
0.754	1.22608e-05	1.31498e-05
0.753	1.40389e-05	1.13718e-05
0.752	1.31498e-05	1.31498e-05
0.751	1.31498e-05	1.13718e-05
0.75	1.31498e-05	1.13718e-05
0.749	1.40389e-05	1.13718e-05
0.748	1.13718e-05	1.13718e-05
0.747	1.31498e-05	1.13718e-05
0.746	1.22608e-05	1.13718e-05
0.745	1.31498e-05	1.22608e-05
0.744	1.22608e-05	1.13718e-05
0.743	1.22608e-05	1.13718e-05
0.742	1.13718e-05	1.22608e-05
0.741	1.13718e-05	1.13718e-05
0.74	1.22608e-05	1.04827e-05
0.739	1.13718e-05	1.04827e-05
0.738	1.22608e-05	1.04827e-05
0.737	1.22608e-05	1.04827e-05
0.736	1.31498e-05	1.04827e-05
0.735	1.22608e-05	9.59362e-06
0.734	1.13718e-05	9.59362e-06
0.733	1.13718e-05	1.04827e-05
0.732	1.13718e-05	1.04827e-05
0.731	1.22608e-05	9.59362e-06
0.73	1.13718e-05	9.59362e-06
0.729	1.13718e-05	9.59362e-06
0.728	1.13718e-05	9.59362e-06
0.727	1.13718e-05	9.59362e-06
0.726	1.13718e-05	1.13718e-05
0.725	1.13718e-05	9.59362e-06
0.724	1.13718e-05	9.59362e-06
0.723	1.04827e-05	9.59362e-06
0.722	1.13718e-05	9.59362e-06
0.721	1.13718e-05	9.59362e-06
0.72	1.13718e-05	9.59362e-06
0.719	1.04827e-05	8.70458e-06
0.718	1.04827e-05	9.59362e-06
0.717	1.13718e-05	9.59362e-06
0.716	1.13718e-05	8.70458e-06
0.715	1.04827e-05	8.70458e-06
0.714	9.59362e-06	8.70458e-06
0.713	1.04827e-05	9.59362e-06
0.712	1.04827e-05	8.70458e-06
0.711	1.04827e-05	8.70458e-06
0.71	1.04827e-05	8.70458e-06
0.709	1.04827e-05	8.70458e-06
0.708	1.04827e-05	8.70458e-06
0.707	1.04827e-05	8.70458e-06
0.706	9.59362e-06	7.81548e-06
0.705	1.04827e-05	7.81548e-06
0.704	1.04827e-05	7.81548e-06
0.703	9.59362e-06	7.81548e-06
0.702	1.04827e-05	7.81548e-06
0.701	9.59362e-06	7.81548e-06
0.7	9.59362e-06	7.81548e-06
0.699	9.59362e-06	7.81548e-06
0.698	9.59362e-06	7.81548e-06
0.697	9.59362e-06	7.81548e-06
0.696	8.70458e-06	7.81548e-06
0.695	9.59362e-06	7.81548e-06
0.694	9.59362e-06	7.81548e-06
0.693	9.59362e-06	6.92644e-06
0.692	9.59362e-06	6.92644e-06
0.691	9.59362e-06	6.92644e-06
0.69	9.59362e-06	6.92644e-06
0.689	9.59362e-06	6.92644e-06
0.688	8.70458e-06	6.92644e-06
0.687	8.70458e-06	6.92644e-06
0.686	9.59362e-06	6.92644e-06
0.685	8.70458e-06	6.0374e-06
0.684	7.81548e-06	6.92644e-06
0.683	8.70458e-06	6.92644e-06
0.682	8.70458e-06	6.0374e-06
0.681	8.70458e-06	6.0374e-06
0.68	8.70458e-06	6.0374e-06
0.679	8.70458e-06	6.0374e-06
0.678	8.70458e-06	6.0374e-06
0.677	8.70458e-06	6.0374e-06
0.676	7.81548e-06	6.0374e-06
0.675	7.81548e-06	6.0374e-06
0.674	8.70458e-06	6.0374e-06
0.673	8.70458e-06	6.0374e-06
0.672	8.70458e-06	6.0374e-06
0.671	7.81548e-06	5.14832e-06
0.67	7.81548e-06	5.14832e-06
0.669	7.81548e-06	6.0374e-06
0.668	7.81548e-06	5.14832e-06
0.667	7.81548e-06	5.14832e-06
0.666	7.81548e-06	5.14832e-06
0.665	7.81548e-06	5.14832e-06
0.664	7.81548e-06	5.14832e-06
0.663	7.81548e-06	5.14832e-06
0.662	7.81548e-06	5.14832e-06
0.661	7.81548e-06	5.14832e-06
0.66	6.92644e-06	5.14832e-06
0.659	6.92644e-06	4.25925e-06
0.658	7.81548e-06	4.25925e-06
0.657	7.81548e-06	4.25925e-06
0.656	6.92644e-06	4.25925e-06
0.655	6.92644e-06	4.25925e-06
0.654	6.92644e-06	4.25925e-06
0.653	6.92644e-06	4.25925e-06
0.652	6.92644e-06	4.25925e-06
0.651	6.92644e-06	4.25925e-06
0.65	6.92644e-06	3.3702e-06
0.649	6.92644e-06	3.3702e-06
0.648	6.92644e-06	3.3702e-06
0.647	6.0374e-06	3.3702e-06
0.646	6.0374e-06	3.3702e-06
0.645	6.0374e-06	3.3702e-06
0.644	6.92644e-06	3.3702e-06
0.643	6.0374e-06	3.3702e-06
0.642	6.92644e-06	3.3702e-06
0.641	6.0374e-06	3.3702e-06
0.64	6.92644e-06	3.3702e-06
0.639	6.0374e-06	3.3702e-06
0.638	6.0374e-06	2.48114e-06
0.637	6.0374e-06	2.48114e-06
0.636	6.0374e-06	2.48114e-06
0.635	6.0374e-06	2.48114e-06
0.634	6.0374e-06	2.48114e-06
0.633	6.0374e-06	2.48114e-06
0.632	6.0374e-06	2.48114e-06
0.631	6.0374e-06	2.48114e-06
0.63	6.0374e-06	1.59207e-06
0.629	5.14832e-06	1.59207e-06
0.628	5.14832e-06	1.59207e-06
0.627	6.0374e-06	2.48114e-06
0.626	5.14832e-06	1.59207e-06
0.625	5.14832e-06	1.59207e-06
0.624	5.14832e-06	1.59207e-06
0.623	5.14832e-06	1.59207e-06
0.622	5.14832e-06	1.59207e-06
0.621	5.14832e-06	1.59207e-06
0.62	5.14832e-06	1.59207e-06
0.619	5.14832e-06	1.59207e-06
0.618	5.14832e-06	1.59207e-06
0.617	4.25925e-06	7.03017e-07
0.616	5.14832e-06	7.03017e-07
0.615	4.25925e-06	7.03017e-07
0.614	4.25925e-06	7.03017e-07
0.613	5.14832e-06	7.03017e-07
0.612	4.25925e-06	7.03017e-07
0.611	4.25925e-06	7.03017e-07
0.61	4.25925e-06	-1.86045e-07
0.609	4.25925e-06	-1.86045e-07
0.608	4.25925e-06	-1.86045e-07
0.607	4.25925e-06	-1.86045e-07
0.606	4.25925e-06	-1.86045e-07
0.605	4.25925e-06	-1.86045e-07
0.604	4.25925e-06	-1.86045e-07
0.603	3.3702e-06	-1.07511e-06
0.602	3.3702e-06	-1.86045e-07
0.601	4.25925e-06	-1.07511e-06
0.6	3.3702e-06	-1.07511e-06
0.599	3.3702e-06	-1.07511e-06
0.598	4.25925e-06	-1.07511e-06
0.597	3.3702e-06	-1.07511e-06
0.596	3.3702e-06	-1.07511e-06
0.595	3.3702e-06	-1.07511e-06
0.594	3.3702e-06	-1.07511e-06
0.593	3.3702e-06	-1.96416e-06
0.592	3.3702e-06	-1.96416e-06
0.591	3.3702e-06	-1.96416e-06
0.59	3.3702e-06	-1.96416e-06
0.589	2.48114e-06	-1.96416e-06
0.588	3.3702e-06	-1.96416e-06
0.587	3.3702e-06	-1.96416e-06
0.586	3.3702e-06	-2.85323e-06
0.585	2.48114e-06	-2.85323e-06
0.584	2.48114e-06	-2.85323e-06
0.583	3.3702e-06	-2.85323e-06
0.582	1.59207e-06	-2.85323e-06
0.581	2.48114e-06	-2.85323e-06
0.58	2.48114e-06	-3.74228e-06
0.579	1.59207e-06	-3.74228e-06
0.578	2.48114e-06	-3.74228e-06
0.577	1.59207e-06	-3.74228e-06
0.576	2.48114e-06	-3.74228e-06
0.575	1.59207e-06	-3.74228e-06
0.574	1.59207e-06	-3.74228e-06
0.573	1.59207e-06	-3.74228e-06
0.572	1.59207e-06	-4.63134e-06
0.571	2.48114e-06	-4.63134e-06
0.57	1.59207e-06	-4.63134e-06
0.569	1.59207e-06	-4.63134e-06
0.568	1.59207e-06	-4.63134e-06
0.567	1.59207e-06	-4.63134e-06
0.566	7.03017e-07	-4.63134e-06
0.565	7.03017e-07	-5.52041e-06
0.564	1.59207e-06	-5.52041e-06
0.563	1.59207e-06	-5.52041e-06
0.562	1.59207e-06	-5.52041e-06
0.561	1.59207e-06	-5.52041e-06
0.56	1.59207e-06	-5.52041e-06
0.559	7.03017e-07	-5.52041e-06
0.558	7.03017e-07	-6.40949e-06
0.557	7.03017e-07	-6.40949e-06
0.556	7.03017e-07	-6.40949e-06
0.555	7.03017e-07	-6.40949e-06
0.554	7.03017e-07	-6.40949e-06
0.553	7.03017e-07	-7.29853e-06
0.552	7.03017e-07	-7.29853e-06
0.551	-1.86045e-07	-7.29853e-06
0.55	-1.86045e-07	-7.29853e-06
0.549	-1.86045e-07	-7.29853e-06
0.548	-1.86045e-07	-8.18757e-06
0.547	-1.86045e-07	-8.18757e-06
0.546	-1.86045e-07	-8.18757e-06
0.545	-1.86045e-07	-8.18757e-06
0.544	-1.86045e-07	-8.18757e-06
0.543	-1.86045e-07	-8.18757e-06
0.542	-1.86045e-07	-8.18757e-06
0.541	-1.07511e-06	-9.07667e-06
0.54	-1.07511e-06	-9.07667e-06
0.539	-1.07511e-06	-9.07667e-06
0.538	-1.07511e-06	-9.07667e-06
0.537	-1.07511e-06	-9.96571e-06
0.536	-1.86045e-07	-9.96571e-06
0.535	-1.86045e-07	-9.96571e-06
0.534	-1.07511e-06	-9.96571e-06
0.533	-1.07511e-06	-1.08547e-05
0.532	-1.07511e-06	-1.08547e-05
0.531	-1.07511e-06	-1.08547e-05
0.53	-1.96416e-06	-1.08547e-05
0.529	-1.07511e-06	-1.08547e-05
0.528	-1.07511e-06	-1.17438e-05
0.527	-1.07511e-06	-1.17438e-05
0.526	-1.96416e-06	-1.17438e-05
0.525	-1.96416e-06	-1.17438e-05
0.524	-1.07511e-06	-1.26329e-05
0.523	-1.96416e-06	-1.17438e-05
0.522	-1.96416e-06	-1.26329e-05
0.521	-1.96416e-06	-1.26329e-05
0.52	-2.85323e-06	-1.26329e-05
0.519	-1.96416e-06	-1.35219e-05
0.518	-1.96416e-06	-1.35219e-05
0.517	-2.85323e-06	-1.35219e-05
0.516	-1.96416e-06	-1.4411e-05
0.515	-2.85323e-06	-1.4411e-05
0.514	-2.85323e-06	-1.4411e-05
0.513	-2.85323e-06	-1.4411e-05
0.512	-2.85323e-06	-1.53001e-05
0.511	-2.85323e-06	-1.53001e-05
0.51	-2.85323e-06	-1.53001e-05
0.509	-3.74228e-06	-1.61892e-05
0.508	-2.85323e-06	-1.61892e-05
0.507	-3.74228e-06	-1.61892e-05
0.506	-3.74228e-06	-1.61892e-05
0.505	-3.74228e-06	-1.70782e-05
0.504	-3.74228e-06	-1.70782e-05
0.503	-3.74228e-06	-1.70782e-05
0.502	-3.74228e-06	-1.79672e-05
0.501	-3.74228e-06	-1.79672e-05
0.5	-3.74228e-06	-1.79672e-05
0.499	-3.74228e-06	-1.88563e-05
0.498	-4.63134e-06	-1.79672e-05
0.497	-3.74228e-06	-1.88563e-05
0.496	-4.63134e-06	-1.88563e-05
0.495	-4.63134e-06	-1.97454e-05
0.494	-4.63134e-06	-1.97454e-05
0.493	-5.52041e-06	-1.97454e-05
0.492	-4.63134e-06	-2.06344e-05
0.491	-5.52041e-06	-2.06344e-05
0.49	-5.52041e-06	-2.15235e-05
0.489	-5.52041e-06	-2.06344e-05
0.488	-4.63134e-06	-2.15235e-05
0.487	-4.63134e-06	-2.15235e-05
0.486	-4.63134e-06	-2.15235e-05
0.485	-5.52041e-06	-2.24125e-05
0.484	-6.40949e-06	-2.24125e-05
0.483	-5.52041e-06	-2.33016e-05
0.482	-5.52041e-06	-2.33016e-05
0.481	-6.40949e-06	-2.33016e-05
0.48	-5.52041e-06	-2.41907e-05
0.479	-4.63134e-06	-2.41907e-05
0.478	-6.40949e-06	-2.50797e-05
0.477	-6.40949e-06	-2.50797e-05
0.476	-6.40949e-06	-2.50797e-05
0.475	-6.40949e-06	-2.59688e-05
0.474	-7.29853e-06	-2.59688e-05
0.473	-6.40949e-06	-2.68579e-05
0.472	-6.40949e-06	-2.68579e-05
0.471	-6.40949e-06	-2.68579e-05
0.47	-6.40949e-06	-2.77469e-05
0.469	-6.40949e-06	-2.77469e-05
0.468	-7.29853e-06	-2.8636e-05
0.467	-7.29853e-06	-2.8636e-05
0.466	-7.29853e-06	-2.9525e-05
0.465	-6.40949e-06	-2.9525e-05
0.464	-8.18757e-06	-3.04141e-05
0.463	-7.29853e-06	-3.04141e-05
0.462	-7.29853e-06	-3.13032e-05
0.461	-7.29853e-06	-3.13032e-05
0.46	-8.18757e-06	-3.13032e-05
0.459	-7.29853e-06	-3.21922e-05
0.458	-8.18757e-06	-3.21922e-05
0.457	-8.18757e-06	-3.30812e-05
0.456	-8.18757e-06	-3.30812e-05
0.455	-8.18757e-06	-3.39703e-05
0.454	-9.07667e-06	-3.48594e-05
0.453	-8.18757e-06	-3.48594e-05
0.452	-8.18757e-06	-3.57485e-05
0.451	-8.18757e-06	-3.66375e-05
0.45	-9.96571e-06	-3.66375e-05
0.449	-9.96571e-06	-3.75266e-05
0.448	-9.07667e-06	-3.75266e-05
0.447	-9.96571e-06	-3.84156e-05
0.446	-9.07667e-06	-3.93047e-05
0.445	-9.07667e-06	-3.93047e-05
0.444	-9.07667e-06	-4.01937e-05
0.443	-9.96571e-06	-4.10828e-05
0.442	-1.08547e-05	-4.10828e-05
0.441	-9.96571e-06	-4.19719e-05
0.44	-9.07667e-06	-4.2861e-05
0.439	-9.07667e-06	-4.2861e-05
0.438	-9.96571e-06	-4.375e-05
0.437	-1.08547e-05	-4.375e-05
0.436	-1.08547e-05	-4.55281e-05
0.435	-1.08547e-05	-4.55281e-05
0.434	-9.96571e-06	-4.64172e-05
0.433	-9.96571e-06	-4.73062e-05
0.432	-9.96571e-06	-4.81953e-05
0.431	-1.17438e-05	-4.90844e-05
0.43	-1.08547e-05	-4.90844e-05
0.429	-9.96571e-06	-4.99734e-05
0.428	-1.17438e-05	-5.08625e-05
0.427	-1.08547e-05	-5.08625e-05
0.426	-1.08547e-05	-5.26406e-05
0.425	-1.26329e-05	-5.26406e-05
0.424	-1.08547e-05	-5.35297e-05
0.423	-1.26329e-05	-5.44187e-05
0.422	-1.08547e-05	-5.53078e-05
0.421	-1.17438e-05	-5.61968e-05
0.42	-1.17438e-05	-5.70859e-05
0.419	-1.17438e-05	-5.79751e-05
0.418	-1.26329e-05	-5.88638e-05
0.417	-1.17438e-05	-5.97531e-05
0.416	-1.17438e-05	-6.06424e-05
0.415	-1.35219e-05	-6.15311e-05
0.414	-1.26329e-05	-6.24203e-05
0.413	-1.17438e-05	-6.3309e-05
0.412	-1.26329e-05	-6.41983e-05
0.411	-1.35219e-05	-6.50876e-05
0.41	-1.26329e-05	-6.59763e-05
0.409	-1.26329e-05	-6.68655e-05
0.408	-1.26329e-05	-6.77548e-05
0.407	-1.26329e-05	-6.86435e-05
0.406	-1.35219e-05	-6.95328e-05
0.405	-1.35219e-05	-7.13107e-05
0.404	-1.35219e-05	-7.13107e-05
0.403	-1.35219e-05	-7.30887e-05
0.402	-1.35219e-05	-7.3978e-05
0.401	-1.4411e-05	-7.48672e-05
0.4	-1.35219e-05	-7.57559e-05
0.399	-1.4411e-05	-7.66452e-05
0.398	-1.53001e-05	-7.84232e-05
0.397	-1.4411e-05	-7.93124e-05
0.396	-1.35219e-05	-8.02017e-05
0.395	-1.4411e-05	-8.10904e-05
0.394	-1.61892e-05	-8.19797e-05
0.393	-1.4411e-05	-8.28684e-05
0.392	-1.4411e-05	-8.37576e-05
0.391	-1.61892e-05	-8.46469e-05
0.39	-1.4411e-05	-8.64249e-05
0.389	-1.61892e-05	-8.73141e-05
0.388	-1.4411e-05	-8.82028e-05
0.387	-1.61892e-05	-8.99814e-05
0.386	-1.53001e-05	-9.17593e-05
0.385	-1.70782e-05	-9.2648e-05
0.384	-1.53001e-05	-9.35373e-05
0.383	-1.53001e-05	-9.53153e-05
0.382	-1.70782e-05	-9.62045e-05
0.381	-1.53001e-05	-9.79825e-05
0.38	-1.53001e-05	-9.88718e-05
0.379	-1.70782e-05	-0.00010065
0.378	-1.61892e-05	-0.000101539
0.377	-1.61892e-05	-0.000103317
0.376	-1.53001e-05	-0.000105095
0.375	-1.70782e-05	-0.000105984
0.374	-1.79672e-05	-0.000107762
0.373	-1.79672e-05	-0.000109541
0.372	-1.70782e-05	-0.000110429
0.371	-1.70782e-05	-0.000112207
0.37	-1.70782e-05	-0.000113986
0.369	-1.70782e-05	-0.000115764
0.368	-1.70782e-05	-0.000116653
0.367	-1.70782e-05	-0.000118431
0.366	-1.79672e-05	-0.000120209
0.365	-1.79672e-05	-0.000121987
0.364	-1.79672e-05	-0.000122876
0.363	-1.88563e-05	-0.000124654
0.362	-1.88563e-05	-0.000126433
0.361	-1.70782e-05	-0.000128211
0.36	-1.79672e-05	-0.000129989
0.359	-1.88563e-05	-0.000130878
0.358	-1.88563e-05	-0.000132656
0.357	-1.79672e-05	-0.000134434
0.356	-1.88563e-05	-0.000136212
0.355	-1.97454e-05	-0.00013799
0.354	-1.88563e-05	-0.00013888
0.353	-1.88563e-05	-0.000140658
0.352	-1.88563e-05	-0.000142436
0.351	-1.97454e-05	-0.000144214
0.35	-1.88563e-05	-0.000145103
0.349	-1.97454e-05	-0.000146881
0.348	-1.88563e-05	-0.000148659
0.347	-2.06344e-05	-0.000150437
0.346	-1.97454e-05	-0.000152215
0.345	-2.06344e-05	-0.000153993
0.344	-1.97454e-05	-0.000155772
0.343	-1.97454e-05	-0.00015755
0.342	-2.15235e-05	-0.000159328
0.341	-1.97454e-05	-0.000161106
0.34	-2.06344e-05	-0.000162884
0.339	-2.06344e-05	-0.000164662
0.338	-1.97454e-05	-0.00016644
0.337	-2.15235e-05	-0.000167329
0.336	-2.06344e-05	-0.000169997
0.335	-2.06344e-05	-0.000171775
0.334	-2.15235e-05	-0.000172664
0.333	-2.15235e-05	-0.000174442
0.332	-2.24125e-05	-0.00017622
0.331	-2.06344e-05	-0.000177998
0.33	-2.15235e-05	-0.000178887
0.329	-2.15235e-05	-0.000180666
0.328	-2.33016e-05	-0.000182444
0.327	-2.33016e-05	-0.000184221
0.326	-2.15235e-05	-0.000185999
0.325	-2.15235e-05	-0.000187778
0.324	-2.15235e-05	-0.000189556
0.323	-2.15235e-05	-0.000191334
0.322	-2.33016e-05	-0.000193112
0.321	-2.15235e-05	-0.000192223
0.32	-2.15235e-05	-0.00019489
0.319	-2.41907e-05	-0.000195779
0.318	-2.15235e-05	-0.000200225
0.317	-2.24125e-05	-0.000198446
0.316	-2.33016e-05	-0.000202003
0.315	-2.15235e-05	-0.000202003
0.314	-2.41907e-05	-0.000205559
0.313	-2.24125e-05	-0.000203781
0.312	-2.41907e-05	-0.000205559
0.311	-2.24125e-05	-0.000208226
0.31	-2.33016e-05	-0.000208226
0.309	-2.24125e-05	-0.000210893
0.308	-2.24125e-05	-0.000211782
0.307	-2.50797e-05	-0.00021356
0.306	-2.24125e-05	-0.000215338
0.305	-2.24125e-05	-0.000215338
0.304	-2.50797e-05	-0.000216228
0.303	-2.33016e-05	-0.000218006
0.302	-2.24125e-05	-0.000218895
0.301	-2.24125e-05	-0.000219784
0.3	-2.50797e-05	-0.000221562
0.299	-2.50797e-05	-0.000222451
0.298	-2.33016e-05	-0.00022334
0.297	-2.24125e-05	-0.000224229
0.296	-2.33016e-05	-0.000225118
0.295	-2.33016e-05	-0.000225118
0.294	-2.33016e-05	-0.000226897
0.293	-2.33016e-05	-0.000227785
0.292	-2.41907e-05	-0.000228675
0.291	-2.33016e-05	-0.000229564
0.29	-2.33016e-05	-0.000230453
0.289	-2.33016e-05	-0.000231342
0.288	-2.33016e-05	-0.000231342
0.287	-2.59688e-05	-0.000232231
0.286	-2.68579e-05	-0.00023312
0.285	-2.41907e-05	-0.000234009
0.284	-2.41907e-05	-0.000234009
0.283	-2.33016e-05	-0.000234898
0.282	-2.68579e-05	-0.000235787
0.281	-2.41907e-05	-0.000235787
0.28	-2.33016e-05	-0.000236676
0.279	-2.77469e-05	-0.000236676
0.278	-2.33016e-05	-0.000237565
0.277	-2.59688e-05	-0.000237565
0.276	-2.41907e-05	-0.000238454
0.275	-2.41907e-05	-0.000238454
0.274	-2.59688e-05	-0.000238454
0.273	-2.59688e-05	-0.000239344
0.272	-2.77469e-05	-0.000239344
0.271	-2.50797e-05	-0.000239344
0.27	-2.41907e-05	-0.000240232
0.269	-2.41907e-05	-0.000240232
0.268	-2.41907e-05	-0.000240232
0.267	-2.50797e-05	-0.000240232
0.266	-2.77469e-05	-0.000240232
0.265	-2.8636e-05	-0.000241121
0.264	-2.50797e-05	-0.000241121
0.263	-2.41907e-05	-0.000241121
0.262	-2.8636e-05	-0.000241121
0.261	-2.77469e-05	-0.000241121
0.26	-2.59688e-05	-0.000241121
0.259	-2.50797e-05	-0.000240232
0.258	-2.50797e-05	-0.000241121
0.257	-2.41907e-05	-0.000241121
0.256	-2.41907e-05	-0.000240232
0.255	-2.41907e-05	-0.000240232
0.254	-2.41907e-05	-0.000240232
0.253	-2.41907e-05	-0.000240232
0.252	-2.33016e-05	-0.000239344
0.251	-2.50797e-05	-0.000240232
0.25	-2.59688e-05	-0.000239344
0.249	-2.59688e-05	-0.000239344
0.248	-2.77469e-05	-0.000239344
0.247	-2.9525e-05	-0.000238454
0.246	-2.59688e-05	-0.000238454
0.245	-2.50797e-05	-0.000238454
0.244	-2.59688e-05	-0.000238454
0.243	-2.8636e-05	-0.000237565
0.242	-2.50797e-05	-0.000237565
0.241	-2.59688e-05	-0.000236676
0.24	-2.8636e-05	-0.000236676
0.239	-2.50797e-05	-0.000235787
0.238	-2.59688e-05	-0.000235787
0.237	-3.04141e-05	-0.000235787
0.236	-2.59688e-05	-0.000235787
0.235	-2.9525e-05	-0.000234009
0.234	-2.41907e-05	-0.000234009
0.233	-2.9525e-05	-0.000234009
0.232	-2.33016e-05	-0.00023312
0.231	-2.8636e-05	-0.00023312
0.23	-2.50797e-05	-0.00023312
0.229	-3.04141e-05	-0.000232231
0.228	-2.68579e-05	-0.000232231
0.227	-2.33016e-05	-0.000231342
0.226	-3.04141e-05	-0.000230453
0.225	-2.68579e-05	-0.000230453
0.224	-2.41907e-05	-0.000229564
0.223	-3.04141e-05	-0.000229564
0.222	-2.9525e-05	-0.000228675
0.221	-2.68579e-05	-0.000228675
0.22	-2.68579e-05	-0.000227785
0.219	-2.41907e-05	-0.000226897
0.218	-2.68579e-05	-0.000226897
0.217	-2.77469e-05	-0.000226007
0.216	-3.04141e-05	-0.000225118
0.215	-3.13032e-05	-0.000225118
0.214	-3.04141e-05	-0.000224229
0.213	-3.04141e-05	-0.000224229
0.212	-3.04141e-05	-0.00022334
0.211	-3.04141e-05	-0.000222451
0.21	-2.68579e-05	-0.000222451
0.209	-2.50797e-05	-0.000221562
0.208	-2.50797e-05	-0.000221562
0.207	-2.59688e-05	-0.000220673
0.206	-2.59688e-05	-0.000219784
0.205	-2.8636e-05	-0.000219784
0.204	-2.8636e-05	-0.000218895
0.203	-2.77469e-05	-0.000218895
0.202	-2.59688e-05	-0.000218006
0.201	-2.59688e-05	-0.000217117
0.2	-2.68579e-05	-0.000216228
0.199	-2.50797e-05	-0.000215338
0.198	-2.9525e-05	-0.000215338
0.197	-2.50797e-05	-0.000216228
0.196	-2.8636e-05	-0.000215338
0.195	-2.50797e-05	-0.00021445
0.194	-2.9525e-05	-0.00021356
0.193	-2.59688e-05	-0.00021356
0.192	-3.04141e-05	-0.000212671
0.191	-2.77469e-05	-0.000211782
0.19	-2.59688e-05	-0.000210893
0.189	-2.8636e-05	-0.000210005
0.188	-2.9525e-05	-0.000209115
0.187	-2.68579e-05	-0.000209115
0.186	-2.59688e-05	-0.000207337
0.185	-2.59688e-05	-0.000210005
0.184	-2.8636e-05	-0.000207337
0.183	-3.04141e-05	-0.000209115
0.182	-2.9525e-05	-0.000209115
0.181	-2.9525e-05	-0.000205559
0.18	-2.8636e-05	-0.000206448
0.179	-2.77469e-05	-0.000205559
0.178	-2.68579e-05	-0.000203781
0.177	-2.77469e-05	-0.00020467
0.176	-2.8636e-05	-0.00020467
0.175	-2.8636e-05	-0.000203781
0.174	-3.04141e-05	-0.000202892
0.173	-2.77469e-05	-0.000201114
0.172	-2.59688e-05	-0.000202003
0.171	-2.68579e-05	-0.000199336
0.17	-2.77469e-05	-0.000198446
0.169	-2.9525e-05	-0.000197558
0.168	-2.68579e-05	-0.000201114
0.167	-2.59688e-05	-0.000197558
0.166	-2.9525e-05	-0.000200225
0.165	-2.68579e-05	-0.000195779
0.164	-2.68579e-05	-0.000199336
0.163	-2.9525e-05	-0.000197558
0.162	-2.59688e-05	-0.000196668
0.161	-2.68579e-05	-0.000197558
0.16	-3.04141e-05	-0.00019489
0.159	-2.59688e-05	-0.000195779
0.158	-2.77469e-05	-0.00019489
0.157	-2.8636e-05	-0.00019489
0.156	-2.68579e-05	-0.000194001
0.155	-3.04141e-05	-0.000194001
0.154	-2.68579e-05	-0.000193112
0.153	-2.9525e-05	-0.00019489
0.152	-2.59688e-05	-0.000193112
0.151	-2.8636e-05	-0.000192223
0.15	-2.59688e-05	-0.000192223
0.149	-2.8636e-05	-0.000191334
0.148	-2.8636e-05	-0.000190445
0.147	-2.68579e-05	-0.000190445
0.146	-2.77469e-05	-0.000190445
0.145	-2.9525e-05	-0.000190445
0.144	-2.68579e-05	-0.000189556
0.143	-2.59688e-05	-0.000188667
0.142	-2.8636e-05	-0.000188667
0.141	-2.8636e-05	-0.000188667
0.14	-2.68579e-05	-0.000187778
0.139	-2.59688e-05	-0.000187778
0.138	-2.8636e-05	-0.000186889
0.137	-2.68579e-05	-0.000186889
0.136	-2.77469e-05	-0.000185999
0.135	-2.68579e-05	-0.000185111
0.134	-2.68579e-05	-0.000185111
0.133	-2.8636e-05	-0.000185111
0.132	-2.59688e-05	-0.000184221
0.131	-2.77469e-05	-0.000184221
0.13	-2.77469e-05	-0.000183332
0.129	-2.68579e-05	-0.000183332
0.128	-2.59688e-05	-0.000182444
0.127	-2.59688e-05	-0.000182444
0.126	-2.68579e-05	-0.000182444
0.125	-2.8636e-05	-0.000181554
0.124	-2.77469e-05	-0.000180666
0.123	-2.68579e-05	-0.000180666
0.122	-2.59688e-05	-0.000180666
0.121	-2.68579e-05	-0.000180666
0.12	-2.8636e-05	-0.000179776
0.119	-2.68579e-05	-0.000179776
0.118	-2.59688e-05	-0.000178887
0.117	-2.8636e-05	-0.000178887
0.116	-2.68579e-05	-0.000178887
0.115	-2.68579e-05	-0.000177998
0.114	-2.8636e-05	-0.000177109
0.113	-2.59688e-05	-0.000177109
0.112	-2.8636e-05	-0.000177109
0.111	-2.68579e-05	-0.00017622
0.11	-2.8636e-05	-0.00017622
0.109	-2.68579e-05	-0.00017622
0.108	-2.8636e-05	-0.000175331
0.107	-2.68579e-05	-0.000175331
0.106	-2.68579e-05	-0.000175331
0.105	-2.77469e-05	-0.000174442
0.104	-2.68579e-05	-0.000174442
0.103	-2.68579e-05	-0.000174442
0.102	-2.8636e-05	-0.000173553
0.101	-2.59688e-05	-0.000172664
0.1	-2.68579e-05	-0.000172664
0.099	-2.77469e-05	-0.000171775
0.098	-2.77469e-05	-0.000172664
0.097	-2.59688e-05	-0.000171775
0.096	-2.68579e-05	-0.000171775
0.095	-2.68579e-05	-0.000170886
0.094	-2.68579e-05	-0.000170886
0.093	-2.68579e-05	-0.000170886
0.092	-2.68579e-05	-0.000170886
0.091	-2.68579e-05	-0.000169997
0.09	-2.77469e-05	-0.000169997
0.089	-2.77469e-05	-0.000169997
0.088	-2.77469e-05	-0.000169107
0.087	-2.77469e-05	-0.000169107
0.086	-2.68579e-05	-0.000168219
0.085	-2.68579e-05	-0.000168219
0.084	-2.68579e-05	-0.000168219
0.083	-2.68579e-05	-0.000167329
0.082	-2.68579e-05	-0.000167329
0.081	-2.8636e-05	-0.000167329
0.08	-2.68579e-05	-0.00016644
0.079	-2.68579e-05	-0.00016644
0.078	-2.68579e-05	-0.00016644
0.077	-2.68579e-05	-0.00016644
0.076	-2.77469e-05	-0.000165551
0.075	-2.68579e-05	-0.000165551
0.074	-2.68579e-05	-0.000165551
0.073	-2.77469e-05	-0.000164662
0.072	-2.59688e-05	-0.000164662
0.071	-2.68579e-05	-0.000164662
0.07	-2.68579e-05	-0.000164662
0.069	-2.77469e-05	-0.000163773
0.068	-2.68579e-05	-0.000163773
0.067	-2.68579e-05	-0.000163773
0.066	-2.77469e-05	-0.000162884
0.065	-2.68579e-05	-0.000162884
0.064	-2.68579e-05	-0.000162884
0.063	-2.68579e-05	-0.000161995
0.062	-2.68579e-05	-0.000161995
0.061	-2.68579e-05	-0.000161995
0.06	-2.68579e-05	-0.000161106
0.059	-2.68579e-05	-0.000161106
0.058	-2.68579e-05	-0.000161106
0.057	-2.68579e-05	-0.000161106
0.056	-2.68579e-05	-0.000161106
0.055	-2.68579e-05	-0.000160217
0.054	-2.77469e-05	-0.000160217
0.053	-2.68579e-05	-0.000160217
0.052	-2.68579e-05	-0.000160217
0.051	-2.68579e-05	-0.000159328
0.05	-2.68579e-05	-0.000159328
0.049	-2.77469e-05	-0.000159328
0.048	-2.68579e-05	-0.000158439
0.047	-2.68579e-05	-0.000158439
0.046	-2.68579e-05	-0.000158439
0.045	-2.68579e-05	-0.000158439
0.044	-2.77469e-05	-0.00015755
0.043	-2.77469e-05	-0.00015755
0.042	-2.68579e-05	-0.00015755
0.041	-2.68579e-05	-0.00015755
0.04	-2.68579e-05	-0.00015755
0.039	-2.77469e-05	-0.00015666
0.038	-2.68579e-05	-0.00015666
0.037	-2.68579e-05	-0.00015666
0.036	-2.68579e-05	-0.00015666
0.035	-2.68579e-05	-0.000155772
0.034	-2.68579e-05	-0.000155772
0.033	-2.77469e-05	-0.000155772
0.032	-2.68579e-05	-0.000154882
0.031	-2.77469e-05	-0.000154882
0.03	-2.68579e-05	-0.000154882
0.029	-2.77469e-05	-0.000154882
0.028	-2.59688e-05	-0.000154882
0.027	-2.68579e-05	-0.000154882
0.026	-2.59688e-05	-0.000153993
0.025	-2.77469e-05	-0.000153993
0.024	-2.68579e-05	-0.000153993
0.023	-2.68579e-05	-0.000153105
0.022	-2.68579e-05	-0.000153993
0.021	-2.68579e-05	-0.000153105
0.02	-2.68579e-05	-0.000153105
0.019	-2.68579e-05	-0.000153105
0.018	-2.68579e-05	-0.000152215
0.017	-2.68579e-05	-0.000153105
0.016	-2.68579e-05	-0.000152215
0.015	-2.68579e-05	-0.000152215
0.014	-2.68579e-05	-0.000151327
0.013	-2.68579e-05	-0.000152215
0.012	-2.68579e-05	-0.000151327
0.011	-2.68579e-05	-0.000151327
0.01	-2.68579e-05	-0.000151327
0.009	-2.77469e-05	-0.000151327
0.008	-2.77469e-05	-0.000151327
0.007	-2.77469e-05	-0.000150437
0.006	-2.68579e-05	-0.000151327
0.005	-2.77469e-05	-0.000150437
0.004	-2.77469e-05	-0.000150437
0.003	-2.68579e-05	-0.000150437
0.002	-2.77469e-05	-0.000149548
0.001	-2.68579e-05	-0.000149548
0	-2.77469e-05	-0.000149548
-0.001	-2.77469e-05	-0.000149548
-0.002	-2.68579e-05	-0.000149548
-0.003	-2.68579e-05	-0.000148659
-0.004	-2.77469e-05	-0.000149548
-0.005	-2.68579e-05	-0.000148659
-0.006	-2.68579e-05	-0.000148659
-0.007	-2.68579e-05	-0.000148659
-0.008	-2.77469e-05	-0.000148659
-0.009	-2.77469e-05	-0.00014777
-0.01	-2.68579e-05	-0.00014777
-0.011	-2.77469e-05	-0.00014777
-0.012	-2.68579e-05	-0.00014777
-0.013	-2.77469e-05	-0.00014777
-0.014	-2.77469e-05	-0.00014777
-0.015	-2.77469e-05	-0.00014777
-0.016	-2.68579e-05	-0.00014777
-0.017	-2.77469e-05	-0.000146881
-0.018	-2.77469e-05	-0.000146881
-0.019	-2.77469e-05	-0.000146881
-0.02	-2.68579e-05	-0.000145992
-0.021	-2.77469e-05	-0.000146881
-0.022	-2.77469e-05	-0.000146881
-0.023	-2.68579e-05	-0.000145992
-0.024	-2.77469e-05	-0.000145992
-0.025	-2.77469e-05	-0.000146881
-0.026	-2.68579e-05	-0.000145992
-0.027	-2.77469e-05	-0.000145992
-0.028	-2.77469e-05	-0.000145992
-0.029	-2.77469e-05	-0.000145992
-0.03	-2.77469e-05	-0.000145103
-0.031	-2.68579e-05	-0.000145103
-0.032	-2.77469e-05	-0.000145103
-0.033	-2.77469e-05	-0.000145103
-0.034	-2.77469e-05	-0.000145103
-0.035	-2.77469e-05	-0.000145103
-0.036	-2.77469e-05	-0.000145103
-0.037	-2.77469e-05	-0.000145103
-0.038	-2.77469e-05	-0.000145103
-0.039	-2.77469e-05	-0.000144214
-0.04	-2.77469e-05	-0.000144214
-0.041	-2.68579e-05	-0.000144214
-0.042	-2.77469e-05	-0.000144214
-0.043	-2.8636e-05	-0.000144214
-0.044	-2.8636e-05	-0.000144214
-0.045	-2.77469e-05	-0.000144214
-0.046	-2.8636e-05	-0.000143325
-0.047	-2.77469e-05	-0.000143325
-0.048	-2.8636e-05	-0.000144214
-0.049	-2.77469e-05	-0.000143325
-0.05	-2.77469e-05	-0.000143325
-0.051	-2.8636e-05	-0.000143325
-0.052	-2.8636e-05	-0.000143325
-0.053	-2.8636e-05	-0.000143325
-0.054	-2.8636e-05	-0.000143325
-0.055	-2.8636e-05	-0.000143325
-0.056	-2.8636e-05	-0.000142436
-0.057	-2.8636e-05	-0.000143325
-0.058	-2.77469e-05	-0.000142436
-0.059	-2.8636e-05	-0.000142436
-0.06	-2.8636e-05	-0.000142436
-0.061	-2.9525e-05	-0.000142436
-0.062	-2.8636e-05	-0.000142436
-0.063	-2.8636e-05	-0.000142436
-0.064	-2.8636e-05	-0.000142436
-0.065	-2.8636e-05	-0.000142436
-0.066	-2.8636e-05	-0.000142436
-0.067	-2.9525e-05	-0.000142436
-0.068	-2.8636e-05	-0.000142436
-0.069	-2.9525e-05	-0.000142436
-0.07	-2.8636e-05	-0.000142436
-0.071	-2.8636e-05	-0.000141547
-0.072	-2.9525e-05	-0.000141547
-0.073	-2.9525e-05	-0.000142436
-0.074	-2.9525e-05	-0.000141547
-0.075	-2.9525e-05	-0.000141547
-0.076	-2.9525e-05	-0.000141547
-0.077	-2.9525e-05	-0.000141547
-0.078	-2.9525e-05	-0.000141547
-0.079	-2.9525e-05	-0.000141547
-0.08	-2.9525e-05	-0.000141547
-0.081	-2.9525e-05	-0.000141547
-0.082	-2.9525e-05	-0.000141547
-0.083	-2.9525e-05	-0.000141547
-0.084	-2.9525e-05	-0.000141547
-0.085	-3.04141e-05	-0.000141547
-0.086	-2.9525e-05	-0.000141547
-0.087	-2.9525e-05	-0.000141547
-0.088	-3.04141e-05	-0.000141547
-0.089	-3.04141e-05	-0.000141547
-0.09	-3.04141e-05	-0.000141547
-0.091	-3.04141e-05	-0.000140658
-0.092	-3.04141e-05	-0.000140658
-0.093	-3.04141e-05	-0.000141547
-0.094	-2.9525e-05	-0.000141547
-0.095	-3.04141e-05	-0.000141547
-0.096	-3.04141e-05	-0.000141547
-0.097	-3.04141e-05	-0.000141547
-0.098	-3.04141e-05	-0.000141547
-0.099	-3.04141e-05	-0.000141547
-0.1	-3.04141e-05	-0.000141547
-0.101	-3.13032e-05	-0.000141547
-0.102	-3.04141e-05	-0.000141547
-0.103	-3.13032e-05	-0.000141547
-0.104	-3.13032e-05	-0.000141547
-0.105	-3.13032e-05	-0.000141547
-0.106	-3.21922e-05	-0.000141547
-0.107	-3.13032e-05	-0.000141547
-0.108	-3.21922e-05	-0.000142436
-0.109	-3.13032e-05	-0.000142436
-0.11	-3.13032e-05	-0.000141547
-0.111	-3.21922e-05	-0.000142436
-0.112	-3.21922e-05	-0.000142436
-0.113	-3.21922e-05	-0.000142436
-0.114	-3.13032e-05	-0.000142436
-0.115	-3.21922e-05	-0.000142436
-0.116	-3.21922e-05	-0.000141547
-0.117	-3.21922e-05	-0.000141547
-0.118	-3.21922e-05	-0.000142436
-0.119	-3.30812e-05	-0.000142436
-0.12	-3.30812e-05	-0.000142436
-0.121	-3.21922e-05	-0.000142436
-0.122	-3.30812e-05	-0.000142436
-0.123	-3.30812e-05	-0.000143325
-0.124	-3.30812e-05	-0.000142436
-0.125	-3.30812e-05	-0.000142436
-0.126	-3.30812e-05	-0.000142436
-0.127	-3.39703e-05	-0.000142436
-0.128	-3.39703e-05	-0.000143325
-0.129	-3.39703e-05	-0.000143325
-0.13	-3.39703e-05	-0.000143325
-0.131	-3.39703e-05	-0.000143325
-0.132	-3.39703e-05	-0.000143325
-0.133	-3.48594e-05	-0.000143325
-0.134	-3.48594e-05	-0.000143325
-0.135	-3.48594e-05	-0.000143325
-0.136	-3.48594e-05	-0.000144214
-0.137	-3.48594e-05	-0.000144214
-0.138	-3.57485e-05	-0.000144214
-0.139	-3.48594e-05	-0.000144214
-0.14	-3.57485e-05	-0.000144214
-0.141	-3.57485e-05	-0.000145103
-0.142	-3.57485e-05	-0.000145103
-0.143	-3.57485e-05	-0.000145103
-0.144	-3.57485e-05	-0.000145103
-0.145	-3.57485e-05	-0.000145103
-0.146	-3.66375e-05	-0.000145103
-0.147	-3.66375e-05	-0.000145103
-0.148	-3.66375e-05	-0.000145103
-0.149	-3.75266e-05	-0.000145992
-0.15	-3.75266e-05	-0.000145992
-0.151	-3.66375e-05	-0.000145992
-0.152	-3.75266e-05	-0.000145992
-0.153	-3.75266e-05	-0.000145992
-0.154	-3.84156e-05	-0.000145992
-0.155	-3.84156e-05	-0.000145992
-0.156	-3.84156e-05	-0.000145992
-0.157	-3.84156e-05	-0.000145992
-0.158	-3.84156e-05	-0.000146881
-0.159	-3.84156e-05	-0.000146881
-0.16	-3.93047e-05	-0.00014777
-0.161	-3.93047e-05	-0.00014777
-0.162	-3.93047e-05	-0.00014777
-0.163	-3.93047e-05	-0.00014777
-0.164	-4.01937e-05	-0.00014777
-0.165	-4.01937e-05	-0.00014777
-0.166	-4.01937e-05	-0.00014777
-0.167	-4.01937e-05	-0.00014777
-0.168	-4.10828e-05	-0.000148659
-0.169	-4.10828e-05	-0.000148659
-0.17	-4.19719e-05	-0.000148659
-0.171	-4.19719e-05	-0.000148659
-0.172	-4.19719e-05	-0.000149548
-0.173	-4.19719e-05	-0.000148659
-0.174	-4.2861e-05	-0.000149548
-0.175	-4.2861e-05	-0.000149548
-0.176	-4.375e-05	-0.000149548
-0.177	-4.375e-05	-0.000149548
-0.178	-4.375e-05	-0.000149548
-0.179	-4.375e-05	-0.000150437
-0.18	-4.4639e-05	-0.000149548
-0.181	-4.4639e-05	-0.000149548
-0.182	-4.4639e-05	-0.000150437
-0.183	-4.55281e-05	-0.000150437
-0.184	-4.55281e-05	-0.000150437
-0.185	-4.55281e-05	-0.000151327
-0.186	-4.64172e-05	-0.000151327
-0.187	-4.64172e-05	-0.000151327
-0.188	-4.64172e-05	-0.000151327
-0.189	-4.64172e-05	-0.000151327
-0.19	-4.73062e-05	-0.000151327
-0.191	-4.81953e-05	-0.000151327
-0.192	-4.73062e-05	-0.000151327
-0.193	-4.81953e-05	-0.000152215
-0.194	-4.81953e-05	-0.000152215
-0.195	-4.90844e-05	-0.000152215
-0.196	-4.90844e-05	-0.000153105
-0.197	-4.90844e-05	-0.000152215
-0.198	-4.99734e-05	-0.000152215
-0.199	-4.99734e-05	-0.000153105
-0.2	-5.08625e-05	-0.000153105
-0.201	-4.99734e-05	-0.000153105
-0.202	-5.08625e-05	-0.000153993
-0.203	-5.17515e-05	-0.000153993
-0.204	-5.08625e-05	-0.000153993
-0.205	-5.17515e-05	-0.000153993
-0.206	-5.26406e-05	-0.000153993
-0.207	-5.26406e-05	-0.000154882
-0.208	-5.35297e-05	-0.000153993
-0.209	-5.35297e-05	-0.000154882
-0.21	-5.35297e-05	-0.000154882
-0.211	-5.44187e-05	-0.000154882
-0.212	-5.44187e-05	-0.000154882
-0.213	-5.44187e-05	-0.000154882
-0.214	-5.44187e-05	-0.000154882
-0.215	-5.53078e-05	-0.000155772
-0.216	-5.61968e-05	-0.000155772
-0.217	-5.70859e-05	-0.000155772
-0.218	-5.70859e-05	-0.000155772
-0.219	-5.70859e-05	-0.00015666
-0.22	-5.79751e-05	-0.00015666
-0.221	-5.79751e-05	-0.00015666
-0.222	-5.88638e-05	-0.00015755
-0.223	-5.88638e-05	-0.00015666
-0.224	-5.88638e-05	-0.00015755
-0.225	-5.97531e-05	-0.00015755
-0.226	-5.97531e-05	-0.00015755
-0.227	-6.06424e-05	-0.00015755
-0.228	-6.06424e-05	-0.000158439
-0.229	-6.15311e-05	-0.000158439
-0.23	-6.15311e-05	-0.000158439
-0.231	-6.24203e-05	-0.000159328
-0.232	-6.3309e-05	-0.000159328
-0.233	-6.3309e-05	-0.000159328
-0.234	-6.41983e-05	-0.000159328
-0.235	-6.41983e-05	-0.000160217
-0.236	-6.41983e-05	-0.000160217
-0.237	-6.50876e-05	-0.000160217
-0.238	-6.50876e-05	-0.000160217
-0.239	-6.50876e-05	-0.000161106
-0.24	-6.59763e-05	-0.000161106
-0.241	-6.68655e-05	-0.000161106
-0.242	-6.68655e-05	-0.000161106
-0.243	-6.77548e-05	-0.000161995
-0.244	-6.86435e-05	-0.000161995
-0.245	-6.86435e-05	-0.000161106
-0.246	-6.86435e-05	-0.000161995
-0.247	-6.95328e-05	-0.000162884
-0.248	-7.0422e-05	-0.000162884
-0.249	-6.95328e-05	-0.000162884
-0.25	-7.13107e-05	-0.000163773
-0.251	-7.13107e-05	-0.000163773
-0.252	-7.22e-05	-0.000163773
-0.253	-7.22e-05	-0.000163773
-0.254	-7.30887e-05	-0.000164662
-0.255	-7.30887e-05	-0.000164662
-0.256	-7.3978e-05	-0.000165551
-0.257	-7.48672e-05	-0.000164662
-0.258	-7.48672e-05	-0.000165551
-0.259	-7.48672e-05	-0.000165551
-0.26	-7.57559e-05	-0.00016644
-0.261	-7.66452e-05	-0.00016644
-0.262	-7.66452e-05	-0.000167329
-0.263	-7.75345e-05	-0.000167329
-0.264	-7.75345e-05	-0.000167329
-0.265	-7.84232e-05	-0.000168219
-0.266	-7.93124e-05	-0.000168219
-0.267	-7.93124e-05	-0.000169107
-0.268	-8.02017e-05	-0.000169107
-0.269	-8.02017e-05	-0.000169107
-0.27	-8.10904e-05	-0.000169997
-0.271	-8.10904e-05	-0.000169997
-0.272	-8.19797e-05	-0.000170886
-0.273	-8.19797e-05	-0.000170886
-0.274	-8.28684e-05	-0.000170886
-0.275	-8.28684e-05	-0.000171775
-0.276	-8.28684e-05	-0.000172664
-0.277	-8.37576e-05	-0.000172664
-0.278	-8.37576e-05	-0.000172664
-0.279	-8.46469e-05	-0.000173553
-0.28	-8.46469e-05	-0.000173553
-0.281	-8.55356e-05	-0.000174442
-0.282	-8.64249e-05	-0.000174442
-0.283	-8.64249e-05	-0.000175331
-0.284	-8.73141e-05	-0.000175331
-0.285	-8.73141e-05	-0.00017622
-0.286	-8.82028e-05	-0.00017622
-0.287	-8.82028e-05	-0.000177109
-0.288	-8.90921e-05	-0.000177109
-0.289	-8.99814e-05	-0.000177109
-0.29	-8.99814e-05	-0.000177998
-0.291	-9.08701e-05	-0.000178887
-0.292	-9.17593e-05	-0.000178887
-0.293	-9.2648e-05	-0.000179776
-0.294	-9.2648e-05	-0.000179776
-0.295	-9.2648e-05	-0.000180666
-0.296	-9.44266e-05	-0.000181554
-0.297	-9.44266e-05	-0.000181554
-0.298	-9.44266e-05	-0.000182444
-0.299	-9.62045e-05	-0.000182444
-0.3	-9.62045e-05	-0.000183332
-0.301	-9.70938e-05	-0.000184221
-0.302	-9.70938e-05	-0.000184221
-0.303	-9.88718e-05	-0.000184221
-0.304	-9.88718e-05	-0.000185111
-0.305	-9.88718e-05	-0.000185111
-0.306	-9.9761e-05	-0.000185111
-0.307	-0.00010065	-0.000186889
-0.308	-0.000101539	-0.000186889
-0.309	-0.000102428	-0.000186889
-0.31	-0.000102428	-0.000188667
-0.311	-0.000103317	-0.000188667
-0.312	-0.000104206	-0.000190445
-0.313	-0.000105095	-0.000188667
-0.314	-0.000105095	-0.000190445
-0.315	-0.000106873	-0.000191334
-0.316	-0.000106873	-0.000191334
-0.317	-0.000107762	-0.000191334
-0.318	-0.000108651	-0.000191334
-0.319	-0.000109541	-0.000194001
-0.32	-0.000110429	-0.000194001
-0.321	-0.000110429	-0.000193112
-0.322	-0.000111319	-0.000195779
-0.323	-0.000112207	-0.00019489
-0.324	-0.000113097	-0.000195779
-0.325	-0.000113986	-0.000195779
-0.326	-0.000113986	-0.000195779
-0.327	-0.000115764	-0.000197558
-0.328	-0.000116653	-0.000199336
-0.329	-0.000116653	-0.000195779
-0.33	-0.000118431	-0.000200225
-0.331	-0.00011932	-0.000200225
-0.332	-0.000120209	-0.000200225
-0.333	-0.000121098	-0.000201114
-0.334	-0.000121987	-0.000203781
-0.335	-0.000121987	-0.000202892
-0.336	-0.000123766	-0.000203781
-0.337	-0.000123766	-0.000203781
-0.338	-0.000125544	-0.00020467
-0.339	-0.000126433	-0.000206448
-0.34	-0.000127321	-0.000205559
-0.341	-0.0001291	-0.000208226
-0.342	-0.000129989	-0.000209115
-0.343	-0.000130878	-0.000209115
-0.344	-0.000132656	-0.000212671
-0.345	-0.000133545	-0.000210893
-0.346	-0.000134434	-0.000212671
-0.347	-0.000135323	-0.00021445
-0.348	-0.000137101	-0.000215338
-0.349	-0.00013799	-0.00021445
-0.35	-0.000139768	-0.000215338
-0.351	-0.000140658	-0.000217117
-0.352	-0.000142436	-0.000218895
-0.353	-0.000144214	-0.000220673
-0.354	-0.000145992	-0.000221562
-0.355	-0.000146881	-0.00022334
-0.356	-0.000149548	-0.000224229
-0.357	-0.000150437	-0.000226007
-0.358	-0.000153993	-0.000226897
-0.359	-0.000154882	-0.000228675
-0.36	-0.000158439	-0.000230453
-0.361	-0.000159328	-0.00023312
-0.362	-0.000161995	-0.000234898
-0.363	-0.000164662	-0.000236676
-0.364	-0.000168219	-0.000239344
-0.365	-0.000169997	-0.000241121
-0.366	-0.000173553	-0.000242899
-0.367	-0.00017622	-0.000245567
-0.368	-0.000179776	-0.000248234
-0.369	-0.000182444	-0.000250901
-0.37	-0.000186889	-0.000253568
-0.371	-0.000190445	-0.000257124
-0.372	-0.000197558	-0.000259792
-0.373	-0.000197558	-0.000262459
-0.374	-0.000199336	-0.000266904
-0.375	-0.000207337	-0.000271349
-0.376	-0.000211782	-0.000274906
-0.377	-0.000216228	-0.00028024
-0.378	-0.000222451	-0.000283796
-0.379	-0.000227785	-0.00029002
-0.38	-0.000234898	-0.000294465
-0.381	-0.00024201	-0.000300688
-0.382	-0.000247345	-0.000305134
-0.383	-0.000255346	-0.000311357
-0.384	-0.000262459	-0.000317581
-0.385	-0.00027046	-0.000324693
-0.386	-0.000278462	-0.000332694
-0.387	-0.000287353	-0.000339807
-0.388	-0.000296243	-0.000347808
-0.389	-0.000306023	-0.000356699
-0.39	-0.000316692	-0.00036559
-0.391	-0.000326471	-0.000375369
-0.392	-0.000338029	-0.00038426
-0.393	-0.000349586	-0.000395818
-0.394	-0.000361145	-0.000406486
-0.395	-0.000373592	-0.000418044
-0.396	-0.000386927	-0.000429602
-0.397	-0.000400263	-0.000442049
-0.398	-0.000415377	-0.000456274
-0.399	-0.000428713	-0.000470499
-0.4	-0.000445605	-0.000483835
-0.401	-0.000461608	-0.000498949
-0.402	-0.000477611	-0.000514952
-0.403	-0.000495393	-0.000530955
-0.404	-0.000512285	-0.000547847
-0.405	-0.000530955	-0.000564739
-0.406	-0.000549625	-0.000583407
-0.407	-0.000570073	-0.000602079
-0.408	-0.000589633	-0.000621638
-0.409	-0.000610079	-0.000642085
-0.41	-0.000631418	-0.000662537
-0.411	-0.00065809	-0.000682983
-0.412	-0.00067587	-0.000706102
-0.413	-0.000698989	-0.000727435
-0.414	-0.000722994	-0.000751441
-0.415	-0.000746994	-0.000774559
-0.416	-0.000771893	-0.000799452
-0.417	-0.000795893	-0.000822565
-0.418	-0.000821678	-0.00084835
-0.419	-0.00084835	-0.00087591
-0.42	-0.00087413	-0.000901695
-0.421	-0.000901695	-0.000928367
-0.422	-0.000929254	-0.000955927
-0.423	-0.000957706	-0.000983486
-0.424	-0.000985266	-0.00101
-0.425	-0.00101	-0.00104
-0.426	-0.00104	-0.00107
-0.427	-0.00107	-0.0011
-0.428	-0.0011	-0.00113
-0.429	-0.00113	-0.00116
-0.43	-0.00116	-0.00119
-0.431	-0.00119	-0.00122
-0.432	-0.00122	-0.00125
-0.433	-0.00125	-0.00128
-0.434	-0.00128	-0.00131
-0.435	-0.00132	-0.00135
-0.436	-0.00134	-0.00138
-0.437	-0.00138	-0.00141
-0.438	-0.00141	-0.00144
-0.439	-0.00144	-0.00147
-0.44	-0.00148	-0.00151
-0.441	-0.00151	-0.00154
-0.442	-0.00154	-0.00157
-0.443	-0.00157	-0.0016
-0.444	-0.0016	-0.00164
-0.445	-0.00164	-0.00167
-0.446	-0.00167	-0.0017
-0.447	-0.0017	-0.00174
-0.448	-0.00173	-0.00177
-0.449	-0.00176	-0.0018
-0.45	-0.00179	-0.00183
-0.451	-0.00183	-0.00186
-0.452	-0.00186	-0.0019
-0.453	-0.00189	-0.00193
-0.454	-0.00192	-0.00196
-0.455	-0.00196	-0.00199
-0.456	-0.00199	-0.00203
-0.457	-0.00202	-0.00206
-0.458	-0.00205	-0.00209
-0.459	-0.00208	-0.00212
-0.46	-0.00211	-0.00215
-0.461	-0.00214	-0.00218
-0.462	-0.00217	-0.00221
-0.463	-0.0022	-0.00224
-0.464	-0.00223	-0.00227
-0.465	-0.00225	-0.0023
-0.466	-0.00229	-0.00233
-0.467	-0.00231	-0.00235
-0.468	-0.00234	-0.00238
-0.469	-0.00237	-0.00241
-0.47	-0.0024	-0.00244
-0.471	-0.00243	-0.00247
-0.472	-0.00245	-0.00249
-0.473	-0.00248	-0.00252
-0.474	-0.0025	-0.00254
-0.475	-0.00253	-0.00257
-0.476	-0.00256	-0.00259
-0.477	-0.00258	-0.00262
-0.478	-0.0026	-0.00264
-0.479	-0.00263	-0.00266
-0.48	-0.00265	-0.00268
-0.481	-0.00267	-0.0027
-0.482	-0.0027	-0.00273
-0.483	-0.00272	-0.00275
-0.484	-0.00274	-0.00277
-0.485	-0.00276	-0.00279
-0.486	-0.00278	-0.00281
-0.487	-0.0028	-0.00282
-0.488	-0.00282	-0.00284
-0.489	-0.00284	-0.00286
-0.49	-0.00286	-0.00288
-0.491	-0.00288	-0.00289
-0.492	-0.0029	-0.00291
-0.493	-0.00291	-0.00292
-0.494	-0.00293	-0.00294
-0.495	-0.00295	-0.00295
-0.496	-0.00296	-0.00297
-0.497	-0.00297	-0.00298
-0.498	-0.00299	-0.00299
-0.499	-0.003	-0.003
-0.5	-0.00302	-0.00301
-0.501	-0.00303	-0.00302
-0.502	-0.00304	-0.00303
-0.503	-0.00305	-0.00304
-0.504	-0.00306	-0.00305
-0.505	-0.00307	-0.00305
-0.506	-0.00308	-0.00306
-0.507	-0.00309	-0.00307
-0.508	-0.0031	-0.00307
-0.509	-0.0031	-0.00308
-0.51	-0.00311	-0.00308
-0.511	-0.00312	-0.00309
-0.512	-0.00312	-0.00309
-0.513	-0.00313	-0.00309
-0.514	-0.00313	-0.00309
-0.515	-0.00314	-0.00309
-0.516	-0.00314	-0.0031
-0.517	-0.00314	-0.0031
-0.518	-0.00315	-0.00309
-0.519	-0.00315	-0.00309
-0.52	-0.00315	-0.00309
-0.521	-0.00315	-0.00309
-0.522	-0.00315	-0.00309
-0.523	-0.00315	-0.00309
-0.524	-0.00315	-0.00308
-0.525	-0.00315	-0.00308
-0.526	-0.00314	-0.00307
-0.527	-0.00314	-0.00307
-0.528	-0.00314	-0.00306
-0.529	-0.00313	-0.00305
-0.53	-0.00313	-0.00305
-0.531	-0.00313	-0.00304
-0.532	-0.00312	-0.00304
-0.533	-0.00312	-0.00303
-0.534	-0.00311	-0.00302
-0.535	-0.0031	-0.00301
-0.536	-0.0031	-0.003
-0.537	-0.00309	-0.00299
-0.538	-0.00308	-0.00299
-0.539	-0.00307	-0.00298
-0.54	-0.00307	-0.00297
-0.541	-0.00306	-0.00296
-0.542	-0.00305	-0.00295
-0.543	-0.00304	-0.00294
-0.544	-0.00303	-0.00293
-0.545	-0.00302	-0.00292
-0.546	-0.00301	-0.00291
-0.547	-0.003	-0.0029
-0.548	-0.00299	-0.00289
-0.549	-0.00298	-0.00287
-0.55	-0.00297	-0.00286
-0.551	-0.00296	-0.00285
-0.552	-0.00295	-0.00284
-0.553	-0.00294	-0.00283
-0.554	-0.00294	-0.00282
-0.555	-0.00292	-0.00281
-0.556	-0.00291	-0.0028
-0.557	-0.0029	-0.00279
-0.558	-0.00289	-0.00277
-0.559	-0.00287	-0.00276
-0.56	-0.00286	-0.00275
-0.561	-0.00285	-0.00274
-0.562	-0.00284	-0.00273
-0.563	-0.00283	-0.00272
-0.564	-0.00282	-0.00271
-0.565	-0.00281	-0.0027
-0.566	-0.0028	-0.00269
-0.567	-0.00279	-0.00268
-0.568	-0.00277	-0.00266
-0.569	-0.00276	-0.00265
-0.57	-0.00275	-0.00264
-0.571	-0.00274	-0.00263
-0.572	-0.00273	-0.00262
-0.573	-0.00272	-0.00261
-0.574	-0.00271	-0.0026
-0.575	-0.0027	-0.00259
-0.576	-0.00269	-0.00258
-0.577	-0.00268	-0.00257
-0.578	-0.00267	-0.00256
-0.579	-0.00265	-0.00255
-0.58	-0.00264	-0.00254
-0.581	-0.00263	-0.00253
-0.582	-0.00262	-0.00252
-0.583	-0.00261	-0.00251
-0.584	-0.0026	-0.0025
-0.585	-0.00259	-0.0025
-0.586	-0.00258	-0.00249
-0.587	-0.00257	-0.00248
-0.588	-0.00257	-0.00247
-0.589	-0.00256	-0.00246
-0.59	-0.00255	-0.00245
-0.591	-0.00254	-0.00244
-0.592	-0.00253	-0.00243
-0.593	-0.00252	-0.00243
-0.594	-0.00251	-0.00242
-0.595	-0.0025	-0.00241
-0.596	-0.0025	-0.0024
-0.597	-0.00249	-0.0024
-0.598	-0.00248	-0.00239
-0.599	-0.00247	-0.00238
-0.6	-0.00247	-0.00237
-0.601	-0.00246	-0.00237
-0.602	-0.00245	-0.00236
-0.603	-0.00244	-0.00235
-0.602	-0.0024	-0.00232
-0.601	-0.00237	-0.00229
-0.6	-0.00234	-0.00226
-0.599	-0.00231	-0.00224
-0.598	-0.00229	-0.00222
-0.597	-0.00227	-0.0022
-0.596	-0.00225	-0.00218
-0.595	-0.00222	-0.00216
-0.594	-0.0022	-0.00214
-0.593	-0.00219	-0.00213
-0.592	-0.00217	-0.00211
-0.591	-0.00215	-0.00209
-0.59	-0.00213	-0.00208
-0.589	-0.00212	-0.00206
-0.588	-0.0021	-0.00205
-0.587	-0.00209	-0.00204
-0.586	-0.00207	-0.00202
-0.585	-0.00205	-0.00201
-0.584	-0.00204	-0.002
-0.583	-0.00202	-0.00198
-0.582	-0.00201	-0.00197
-0.581	-0.002	-0.00196
-0.58	-0.00198	-0.00194
-0.579	-0.00197	-0.00193
-0.578	-0.00196	-0.00192
-0.577	-0.00194	-0.0019
-0.576	-0.00193	-0.00189
-0.575	-0.00192	-0.00188
-0.574	-0.0019	-0.00187
-0.573	-0.00189	-0.00186
-0.572	-0.00188	-0.00184
-0.571	-0.00186	-0.00183
-0.57	-0.00185	-0.00182
-0.569	-0.00184	-0.00181
-0.568	-0.00183	-0.0018
-0.567	-0.00181	-0.00179
-0.566	-0.0018	-0.00177
-0.565	-0.00179	-0.00176
-0.564	-0.00178	-0.00175
-0.563	-0.00176	-0.00174
-0.562	-0.00175	-0.00173
-0.561	-0.00174	-0.00172
-0.56	-0.00173	-0.0017
-0.559	-0.00171	-0.00169
-0.558	-0.0017	-0.00168
-0.557	-0.00169	-0.00167
-0.556	-0.00168	-0.00166
-0.555	-0.00166	-0.00164
-0.554	-0.00165	-0.00163
-0.553	-0.00164	-0.00162
-0.552	-0.00163	-0.00161
-0.551	-0.00161	-0.0016
-0.55	-0.0016	-0.00159
-0.549	-0.00159	-0.00157
-0.548	-0.00157	-0.00156
-0.547	-0.00156	-0.00155
-0.546	-0.00155	-0.00154
-0.545	-0.00154	-0.00152
-0.544	-0.00152	-0.00151
-0.543	-0.00151	-0.0015
-0.542	-0.0015	-0.00149
-0.541	-0.00148	-0.00147
-0.54	-0.00147	-0.00146
-0.539	-0.00146	-0.00145
-0.538	-0.00144	-0.00143
-0.537	-0.00143	-0.00142
-0.536	-0.00141	-0.00141
-0.535	-0.0014	-0.00139
-0.534	-0.00139	-0.00138
-0.533	-0.00137	-0.00136
-0.532	-0.00136	-0.00135
-0.531	-0.00134	-0.00134
-0.53	-0.00133	-0.00132
-0.529	-0.00131	-0.00131
-0.528	-0.0013	-0.00129
-0.527	-0.00128	-0.00128
-0.526	-0.00127	-0.00126
-0.525	-0.00125	-0.00125
-0.524	-0.00123	-0.00123
-0.523	-0.00122	-0.00122
-0.522	-0.0012	-0.0012
-0.521	-0.00118	-0.00118
-0.52	-0.00117	-0.00117
-0.519	-0.00115	-0.00115
-0.518	-0.00113	-0.00113
-0.517	-0.00111	-0.00112
-0.516	-0.0011	-0.0011
-0.515	-0.00108	-0.00108
-0.514	-0.00106	-0.00107
-0.513	-0.00104	-0.00105
-0.512	-0.00103	-0.00103
-0.511	-0.00101	-0.00101
-0.51	-0.000990599	-0.000993266
-0.509	-0.000971927	-0.000974593
-0.508	-0.00095326	-0.000955927
-0.507	-0.000932808	-0.000936367
-0.506	-0.000914141	-0.000916808
-0.505	-0.000894582	-0.000897249
-0.504	-0.00087413	-0.000875023
-0.503	-0.000853684	-0.00085635
-0.502	-0.000833237	-0.000835904
-0.501	-0.000813678	-0.000815452
-0.5	-0.000792339	-0.000795893
-0.499	-0.000771	-0.000773667
-0.498	-0.000749661	-0.00075322
-0.497	-0.000729215	-0.000730994
-0.496	-0.000706989	-0.000709655
-0.495	-0.000684763	-0.000687429
-0.494	-0.000661644	-0.000665203
-0.493	-0.000640311	-0.000642977
-0.492	-0.000618085	-0.000619859
-0.491	-0.000594966	-0.000596746
-0.49	-0.00057274	-0.000573627
-0.489	-0.000548736	-0.000549625
-0.488	-0.00052562	-0.00052651
-0.487	-0.000501616	-0.000502505
-0.486	-0.000478501	-0.000477611
-0.485	-0.000454496	-0.000453607
-0.484	-0.000427824	-0.000432269
-0.483	-0.000405598	-0.000403819
-0.482	-0.000380704	-0.000378037
-0.481	-0.000356699	-0.000354032
-0.48	-0.000331806	-0.000329138
-0.479	-0.000306912	-0.000302467
-0.478	-0.000282018	-0.000276684
-0.477	-0.000255346	-0.000250901
-0.476	-0.000230453	-0.000224229
-0.475	-0.000203781	-0.00019489
-0.474	-0.000177998	-0.000171775
-0.473	-0.000151327	-0.000144214
-0.472	-0.000125544	-0.000117542
-0.471	-9.88718e-05	-8.99814e-05
-0.47	-7.3978e-05	-6.3309e-05
-0.469	-4.64172e-05	-3.57485e-05
-0.468	-2.06344e-05	-9.07667e-06
-0.467	6.92644e-06	1.75951e-05
-0.466	3.62654e-05	4.78232e-05
-0.465	6.2048e-05	7.62729e-05
-0.464	8.87198e-05	0.000103834
-0.463	0.000116281	0.000132284
-0.462	0.000144731	0.000161623
-0.461	0.000172292	0.000190073
-0.46	0.000198963	0.000218523
-0.459	0.000226524	0.000247862
-0.458	0.000260308	0.000276312
-0.457	0.000284313	0.00030654
-0.456	0.000311874	0.00033499
-0.455	0.000340324	0.000364329
-0.454	0.000368774	0.000393668
-0.453	0.000397224	0.000423007
-0.452	0.000425674	0.000452346
-0.451	0.000453234	0.000482573
-0.45	0.000483463	0.000511024
-0.449	0.000510134	0.000540363
-0.448	0.000539473	0.000569701
-0.447	0.000567034	0.00059904
-0.446	0.000595486	0.000629271
-0.445	0.000623932	0.00065861
-0.444	0.000651497	0.000687056
-0.443	0.000680836	0.000716395
-0.442	0.000708395	0.000745734
-0.441	0.000735955	0.000774186
-0.44	0.000764407	0.000803525
-0.439	0.000791966	0.000831972
-0.438	0.000820418	0.000860424
-0.437	0.00084709	0.000888876
-0.436	0.00087465	0.000916435
-0.435	0.000902209	0.000944887
-0.434	0.000930661	0.000972446
-0.433	0.000956441	0.001
-0.432	0.000983113	0.00103
-0.431	0.00101	0.00106
-0.43	0.00104	0.00108
-0.429	0.00106	0.00111
-0.428	0.00109	0.00114
-0.427	0.00111	0.00116
-0.426	0.00114	0.00119
-0.425	0.00116	0.00121
-0.424	0.00119	0.00124
-0.423	0.00122	0.00126
-0.422	0.00124	0.00129
-0.421	0.00126	0.00131
-0.42	0.00129	0.00133
-0.419	0.00131	0.00135
-0.418	0.00133	0.00138
-0.417	0.00135	0.0014
-0.416	0.00138	0.00142
-0.415	0.00139	0.00144
-0.414	0.00142	0.00146
-0.413	0.00144	0.00148
-0.412	0.00146	0.00149
-0.411	0.00147	0.00151
-0.41	0.00149	0.00153
-0.409	0.00151	0.00154
-0.408	0.00153	0.00156
-0.407	0.00155	0.00157
-0.406	0.00156	0.00159
-0.405	0.00158	0.0016
-0.404	0.00159	0.00161
-0.403	0.0016	0.00162
-0.402	0.00162	0.00163
-0.401	0.00163	0.00164
-0.4	0.00164	0.00164
-0.399	0.00165	0.00165
-0.398	0.00166	0.00166
-0.397	0.00167	0.00166
-0.396	0.00168	0.00166
-0.395	0.00169	0.00166
-0.394	0.00169	0.00167
-0.393	0.0017	0.00167
-0.392	0.0017	0.00166
-0.391	0.00171	0.00166
-0.39	0.00171	0.00166
-0.389	0.00171	0.00165
-0.388	0.00171	0.00164
-0.387	0.00171	0.00164
-0.386	0.00171	0.00163
-0.385	0.00171	0.00162
-0.384	0.00171	0.00161
-0.383	0.0017	0.0016
-0.382	0.0017	0.00159
-0.381	0.00169	0.00158
-0.38	0.00168	0.00156
-0.379	0.00168	0.00155
-0.378	0.00167	0.00153
-0.377	0.00166	0.00152
-0.376	0.00165	0.0015
-0.375	0.00164	0.00149
-0.374	0.00163	0.00147
-0.373	0.00161	0.00145
-0.372	0.0016	0.00144
-0.371	0.00159	0.00142
-0.37	0.00158	0.0014
-0.369	0.00156	0.00138
-0.368	0.00155	0.00137
-0.367	0.00154	0.00135
-0.366	0.00152	0.00133
-0.365	0.00151	0.00131
-0.364	0.00149	0.0013
-0.363	0.00148	0.00128
-0.362	0.00146	0.00126
-0.361	0.00145	0.00125
-0.36	0.00143	0.00123
-0.359	0.00141	0.00122
-0.358	0.0014	0.0012
-0.357	0.00138	0.00118
-0.356	0.00137	0.00117
-0.355	0.00135	0.00115
-0.354	0.00134	0.00114
-0.353	0.00132	0.00112
-0.352	0.00131	0.00111
-0.351	0.00129	0.0011
-0.35	0.00128	0.00108
-0.349	0.00126	0.00107
-0.348	0.00125	0.00106
-0.347	0.00124	0.00104
-0.346	0.00122	0.00103
-0.345	0.00121	0.00102
-0.344	0.0012	0.00101
-0.343	0.00118	0.000994672
-0.342	0.00117	0.000984006
-0.341	0.00116	0.000971559
-0.34	0.00114	0.000960887
-0.339	0.00113	0.000949328
-0.338	0.00112	0.000940441
-0.337	0.00111	0.000927994
-0.336	0.0011	0.000919102
-0.335	0.00109	0.000909322
-0.334	0.00108	0.000899542
-0.333	0.00106	0.000889763
-0.332	0.00105	0.00088087
-0.331	0.00104	0.000871983
-0.33	0.00103	0.00086309
-0.329	0.00102	0.000854203
-0.328	0.00101	0.000846198
-0.327	0.001	0.000837311
-0.326	0.000994672	0.000829305
-0.325	0.00098578	0.000821305
-0.324	0.000976	0.000814192
-0.323	0.000967113	0.000806192
-0.322	0.000957333	0.000798192
-0.321	0.000948441	0.000790186
-0.32	0.00094222	0.000783073
-0.319	0.000929768	0.000775966
-0.318	0.000924435	0.00076974
-0.317	0.000916435	0.000762627
-0.316	0.000908435	0.000755514
-0.315	0.000899542	0.000749294
-0.314	0.000892429	0.000742181
-0.313	0.000885316	0.000735955
-0.312	0.000877316	0.000728842
-0.311	0.000870203	0.000723508
-0.31	0.000863983	0.000719062
-0.309	0.000855977	0.000713729
-0.308	0.000848864	0.000705729
-0.307	0.000842644	0.000699503
-0.306	0.000836418	0.000694169
-0.305	0.000829305	0.000687949
-0.304	0.000823972	0.00068261
-0.303	0.000817751	0.00067639
-0.302	0.000810638	0.000671056
-0.301	0.000805305	0.000665718
-0.3	0.000798192	0.000660384
-0.299	0.000792853	0.000655051
-0.298	0.000786633	0.000650605
-0.297	0.000780407	0.000646158
-0.296	0.000775073	0.000640825
-0.295	0.00076974	0.000636379
-0.294	0.000764407	0.000631045
-0.293	0.000759073	0.000626599
-0.292	0.000753734	0.000621266
-0.291	0.000748401	0.000616819
-0.29	0.000742181	0.000612379
-0.289	0.000737734	0.000607932
-0.288	0.000732401	0.000603486
-0.287	0.000727068	0.00059904
-0.286	0.000721729	0.000594593
-0.285	0.000715508	0.00059104
-0.284	0.000710175	0.000586593
-0.283	0.000704836	0.00058304
-0.282	0.000703062	0.000577701
-0.281	0.000697729	0.000574147
-0.28	0.000693282	0.000569701
-0.279	0.000688836	0.000566147
-0.278	0.00068439	0.000562589
-0.277	0.000679056	0.000558144
-0.276	0.00067461	0.000555477
-0.275	0.000670164	0.000551031
-0.274	0.00066661	0.000547475
-0.273	0.000662164	0.000543919
-0.272	0.00065861	0.000540363
-0.271	0.000655051	0.000536806
-0.27	0.000650605	0.00053325
-0.269	0.000646158	0.000529694
-0.268	0.000641718	0.000526138
-0.267	0.000638158	0.000522581
-0.266	0.000633712	0.000519914
-0.265	0.000630158	0.000516358
-0.264	0.000626599	0.000512802
-0.263	0.000622158	0.000509245
-0.262	0.000618599	0.000505689
-0.261	0.000614153	0.000503022
-0.26	0.000610599	0.000500355
-0.259	0.00060704	0.00049591
-0.258	0.000603486	0.000492353
-0.257	0.000600819	0.000490575
-0.256	0.00059726	0.00048613
-0.255	0.000593706	0.000480795
-0.254	0.000590153	0.000480795
-0.253	0.000585706	0.00047635
-0.252	0.00058304	0.000475461
-0.251	0.00057948	0.000471016
-0.25	0.000575927	0.000471016
-0.249	0.00057326	0.00046746
-0.248	0.000569701	0.000464793
-0.247	0.000566147	0.000462125
-0.246	0.000563478	0.000458569
-0.245	0.000559922	0.000455902
-0.244	0.000556366	0.000452346
-0.243	0.000553698	0.000450567
-0.242	0.000550142	0.0004479
-0.241	0.000547475	0.000445233
-0.24	0.000544808	0.000442566
-0.239	0.000542141	0.000439899
-0.238	0.000538584	0.000437232
-0.237	0.000535918	0.000435454
-0.236	0.00053325	0.000432786
-0.235	0.000529694	0.000430119
-0.234	0.000527027	0.000428341
-0.233	0.000524359	0.000424785
-0.232	0.000521692	0.000423007
-0.231	0.000519025	0.00042034
-0.23	0.000516358	0.000418561
-0.229	0.000513691	0.000415894
-0.228	0.000510134	0.000414116
-0.227	0.000507467	0.00041056
-0.226	0.0005048	0.000408781
-0.225	0.000502133	0.000406115
-0.224	0.000499466	0.000403447
-0.223	0.000496799	0.000401669
-0.222	0.000494132	0.000399891
-0.221	0.000491464	0.000397224
-0.22	0.000488797	0.000395446
-0.219	0.000489686	0.000392779
-0.218	0.000483463	0.000391001
-0.217	0.000483463	0.000388333
-0.216	0.000480795	0.000385666
-0.215	0.000479018	0.000383888
-0.214	0.000473683	0.00038211
-0.213	0.000471905	0.000380332
-0.212	0.000470127	0.000378554
-0.211	0.000468349	0.000375886
-0.21	0.000464793	0.000374108
-0.209	0.000463014	0.000371441
-0.208	0.000460347	0.000369663
-0.207	0.000458569	0.000367885
-0.206	0.000455902	0.000366107
-0.205	0.000453234	0.000364329
-0.204	0.000450567	0.000361662
-0.203	0.000448789	0.000359883
-0.202	0.000447011	0.000358105
-0.201	0.000444344	0.000356327
-0.2	0.000442566	0.00035366
-0.199	0.000440788	0.000352771
-0.198	0.00043812	0.000350103
-0.197	0.000436342	0.000348325
-0.196	0.000433675	0.000346547
-0.195	0.000431897	0.000344769
-0.194	0.00042923	0.000342991
-0.193	0.000427452	0.000341213
-0.192	0.000425674	0.000339435
-0.191	0.000423895	0.000337657
-0.19	0.000422118	0.000335879
-0.189	0.00042034	0.000334101
-0.188	0.000418561	0.000332323
-0.187	0.000415894	0.000330544
-0.186	0.000414116	0.000328766
-0.185	0.000412338	0.000326988
-0.184	0.000409671	0.00032521
-0.183	0.000407893	0.000324321
-0.182	0.000406115	0.000321654
-0.181	0.000404336	0.000320764
-0.18	0.000402558	0.000318986
-0.179	0.000399891	0.000317208
-0.178	0.000399002	0.000315431
-0.177	0.000397224	0.000314541
-0.176	0.000394556	0.000312763
-0.175	0.000392779	0.000311874
-0.174	0.000391001	0.000310096
-0.173	0.000389222	0.000308318
-0.172	0.000387444	0.00030654
-0.171	0.000385666	0.000304762
-0.17	0.000383888	0.000302984
-0.169	0.00038211	0.000302094
-0.168	0.000380332	0.000300316
-0.167	0.000378554	0.000299427
-0.166	0.000376776	0.000297649
-0.165	0.000374997	0.000295871
-0.164	0.000374108	0.000294093
-0.163	0.000371441	0.000292315
-0.162	0.000370552	0.000291425
-0.161	0.000368774	0.000289647
-0.16	0.000366996	0.000287869
-0.159	0.000365218	0.00028698
-0.158	0.00036344	0.000286092
-0.157	0.00036255	0.000283424
-0.156	0.000360772	0.000282535
-0.155	0.000358994	0.000280757
-0.154	0.000357216	0.000279868
-0.153	0.000355438	0.00027809
-0.152	0.00035366	0.000277201
-0.151	0.000352771	0.000275423
-0.15	0.000350993	0.000273645
-0.149	0.000349215	0.000272755
-0.148	0.000347437	0.000270977
-0.147	0.000345658	0.000269199
-0.146	0.000344769	0.00026831
-0.145	0.000342991	0.000266532
-0.144	0.000341213	0.000265643
-0.143	0.000340324	0.000263865
-0.142	0.000338546	0.000263865
-0.141	0.000336768	0.000262086
-0.14	0.000335879	0.000262086
-0.139	0.000334101	0.000255863
-0.138	0.000332323	0.000254974
-0.137	0.000331433	0.000256753
-0.136	0.000329655	0.000252307
-0.135	0.000327877	0.000251418
-0.134	0.000326988	0.000254085
-0.133	0.000326099	0.000253196
-0.132	0.000324321	0.000250529
-0.131	0.000322543	0.00024964
-0.13	0.000321654	0.000246084
-0.129	0.000319876	0.000246973
-0.128	0.000318986	0.000245194
-0.127	0.000318098	0.000244306
-0.126	0.000316319	0.000241638
-0.125	0.000315431	0.000240749
-0.124	0.000313652	0.000238971
-0.123	0.000312763	0.000238971
-0.122	0.000310985	0.000237193
-0.121	0.000310096	0.000235415
-0.12	0.000308318	0.000234526
-0.119	0.000307429	0.000233637
-0.118	0.00030654	0.000232747
-0.117	0.000304762	0.000230969
-0.116	0.000303872	0.000230081
-0.115	0.000302094	0.000229192
-0.114	0.000300316	0.000227414
-0.113	0.000299427	0.000226524
-0.112	0.000297649	0.000224746
-0.111	0.00029676	0.000223857
-0.11	0.000295871	0.000222968
-0.109	0.000294982	0.00022119
-0.108	0.000293204	0.000220301
-0.107	0.000292315	0.000219412
-0.106	0.000290537	0.000218523
-0.105	0.000289647	0.000216745
-0.104	0.000287869	0.000215855
-0.103	0.00028698	0.000214967
-0.102	0.000286092	0.000213188
-0.101	0.000285202	0.000212299
-0.1	0.000283424	0.00021141
-0.099	0.000282535	0.000210521
-0.098	0.000281646	0.000208743
-0.097	0.000279868	0.000207854
-0.096	0.000278979	0.000206965
-0.095	0.000277201	0.000206076
-0.094	0.000276312	0.000205187
-0.093	0.000275423	0.000204298
-0.092	0.000274533	0.000203408
-0.091	0.000272755	0.00020252
-0.09	0.000271866	0.000201631
-0.089	0.000270977	0.000199853
-0.088	0.000269199	0.000199853
-0.087	0.00026831	0.000198075
-0.086	0.000267421	0.000197185
-0.085	0.000266532	0.000196296
-0.084	0.000264754	0.000195407
-0.083	0.000264754	0.000194518
-0.082	0.000262976	0.000193629
-0.081	0.000261198	0.00019274
-0.08	0.000261198	0.000190962
-0.079	0.00025942	0.000190962
-0.078	0.000258531	0.000189184
-0.077	0.00025942	0.000188295
-0.076	0.000254974	0.000187406
-0.075	0.000253196	0.000186516
-0.074	0.000256753	0.000185628
-0.073	0.000254085	0.000184738
-0.072	0.000254974	0.000183849
-0.071	0.000253196	0.000183849
-0.07	0.000248751	0.000182071
-0.069	0.000250529	0.000181182
-0.068	0.000248751	0.000181182
-0.067	0.000246973	0.000179404
-0.066	0.000244306	0.000178515
-0.065	0.000246973	0.000178515
-0.064	0.000246084	0.000177626
-0.063	0.000244306	0.000176737
-0.062	0.000243416	0.000174959
-0.061	0.000242527	0.000174069
-0.06	0.000241638	0.000174069
-0.059	0.000240749	0.000173181
-0.058	0.00023986	0.000172292
-0.057	0.000238971	0.000171403
-0.056	0.000238971	0.000170514
-0.055	0.000237193	0.000169624
-0.054	0.000236304	0.000168736
-0.053	0.000235415	0.000167846
-0.052	0.000234526	0.000167846
-0.051	0.000233637	0.000166957
-0.05	0.000232747	0.000166068
-0.049	0.000231859	0.000165179
-0.048	0.000230969	0.00016429
-0.047	0.000230081	0.00016429
-0.046	0.000229192	0.000162512
-0.045	0.000228302	0.000161623
-0.044	0.000228302	0.000160734
-0.043	0.000226524	0.000160734
-0.042	0.000226524	0.000159845
-0.041	0.000225635	0.000159845
-0.04	0.000224746	0.000158067
-0.039	0.000223857	0.000158067
-0.038	0.000222968	0.000157177
-0.037	0.000222079	0.000156289
-0.036	0.00022119	0.000156289
-0.035	0.00022119	0.000155399
-0.034	0.000220301	0.00015451
-0.033	0.000219412	0.000153621
-0.032	0.000218523	0.000153621
-0.031	0.000217634	0.000152732
-0.03	0.000216745	0.000151844
-0.029	0.000215855	0.000151844
-0.028	0.000215855	0.000150065
-0.027	0.000214077	0.000150065
-0.026	0.000214077	0.000149176
-0.025	0.000213188	0.000149176
-0.024	0.000212299	0.000148287
-0.023	0.00021141	0.000147398
-0.022	0.00021141	0.000147398
-0.021	0.000210521	0.000146509
-0.02	0.000209632	0.00014562
-0.019	0.000209632	0.00014562
-0.018	0.000208743	0.000144731
-0.017	0.000207854	0.000144731
-0.016	0.000206965	0.000143842
-0.015	0.000206965	0.000142953
-0.014	0.000206076	0.000142953
-0.013	0.000205187	0.000142064
-0.012	0.000204298	0.000141175
-0.011	0.000204298	0.000141175
-0.01	0.000203408	0.000140285
-0.009	0.000203408	0.000140285
-0.008	0.00020252	0.000139397
-0.007	0.000201631	0.000138507
-0.006	0.000201631	0.000138507
[truncated: 802 more rows]

## Sheet: N2 raw data
Potential	Pt under N2
E / vs. Ag/AgCl	i / A
0.6	3.11434e-07
0.599	3.11434e-07
0.598	3.27171e-07
0.597	3.11434e-07
0.596	2.95698e-07
0.595	3.27171e-07
0.594	2.95698e-07
0.593	2.79962e-07
0.592	2.79962e-07
0.591	2.79962e-07
0.59	3.11434e-07
0.589	2.95698e-07
0.588	2.64225e-07
0.587	2.79962e-07
0.586	2.95698e-07
0.585	2.64225e-07
0.584	2.64225e-07
0.583	2.95698e-07
0.582	2.64225e-07
0.581	2.64225e-07
0.58	2.48489e-07
0.579	2.48489e-07
0.578	2.48489e-07
0.577	2.64225e-07
0.576	2.32752e-07
0.575	2.64225e-07
0.574	2.48489e-07
0.573	2.79962e-07
0.572	2.64225e-07
0.571	2.79962e-07
0.57	2.48489e-07
0.569	2.48489e-07
0.568	2.64225e-07
0.567	2.48489e-07
0.566	2.32752e-07
0.565	2.48489e-07
0.564	2.64225e-07
0.563	2.64225e-07
0.562	2.48489e-07
0.561	2.32752e-07
0.56	2.32752e-07
0.559	2.32752e-07
0.558	2.48489e-07
0.557	2.17016e-07
0.556	2.48489e-07
0.555	2.32752e-07
0.554	2.32752e-07
0.553	2.32752e-07
0.552	2.48489e-07
0.551	2.0128e-07
0.55	2.32752e-07
0.549	2.17016e-07
0.548	2.32752e-07
0.547	2.17016e-07
0.546	2.17016e-07
0.545	2.0128e-07
0.544	2.0128e-07
0.543	2.17016e-07
0.542	2.0128e-07
0.541	2.17016e-07
0.54	2.17016e-07
0.539	2.32752e-07
0.538	2.17016e-07
0.537	2.0128e-07
0.536	2.0128e-07
0.535	2.0128e-07
0.534	2.17016e-07
0.533	2.0128e-07
0.532	2.0128e-07
0.531	2.0128e-07
0.53	2.0128e-07
0.529	2.0128e-07
0.528	2.0128e-07
0.527	2.0128e-07
0.526	1.85543e-07
0.525	2.0128e-07
0.524	2.0128e-07
0.523	2.0128e-07
0.522	1.85543e-07
0.521	1.85543e-07
0.52	2.0128e-07
0.519	2.0128e-07
0.518	1.85543e-07
0.517	1.69807e-07
0.516	1.85543e-07
0.515	1.85543e-07
0.514	1.85543e-07
0.513	1.85543e-07
0.512	1.85543e-07
0.511	1.85543e-07
0.51	1.85543e-07
0.509	1.69807e-07
0.508	1.85543e-07
0.507	1.85543e-07
0.506	1.69807e-07
0.505	1.85543e-07
0.504	1.69807e-07
0.503	1.69807e-07
0.502	1.69807e-07
0.501	1.69807e-07
0.5	1.69807e-07
0.499	1.54071e-07
0.498	1.69807e-07
0.497	1.69807e-07
0.496	1.69807e-07
0.495	1.69807e-07
0.494	1.69807e-07
0.493	1.69807e-07
0.492	1.69807e-07
0.491	1.54071e-07
0.49	1.54071e-07
0.489	1.69807e-07
0.488	1.54071e-07
0.487	1.38334e-07
0.486	1.54071e-07
0.485	1.54071e-07
0.484	1.54071e-07
0.483	1.54071e-07
0.482	1.54071e-07
0.481	1.54071e-07
0.48	1.54071e-07
0.479	1.38334e-07
0.478	1.38334e-07
0.477	1.54071e-07
0.476	1.54071e-07
0.475	1.54071e-07
0.474	1.38334e-07
0.473	1.38334e-07
0.472	1.38334e-07
0.471	1.38334e-07
0.47	1.38334e-07
0.469	1.38334e-07
0.468	1.38334e-07
0.467	1.38334e-07
0.466	1.38334e-07
0.465	1.38334e-07
0.464	1.38334e-07
0.463	1.22598e-07
0.462	1.22598e-07
0.461	1.38334e-07
0.46	1.38334e-07
0.459	1.22598e-07
0.458	1.22598e-07
0.457	1.22598e-07
0.456	1.22598e-07
0.455	1.22598e-07
0.454	1.22598e-07
0.453	1.22598e-07
0.452	1.22598e-07
0.451	1.22598e-07
0.45	1.06862e-07
0.449	1.06862e-07
0.448	1.06862e-07
0.447	1.22598e-07
0.446	1.06862e-07
0.445	1.22598e-07
0.444	1.06862e-07
0.443	1.22598e-07
0.442	1.06862e-07
0.441	1.06862e-07
0.44	1.06862e-07
0.439	1.06862e-07
0.438	1.06862e-07
0.437	1.06862e-07
0.436	1.06862e-07
0.435	1.06862e-07
0.434	1.06862e-07
0.433	1.06862e-07
0.432	9.11252e-08
0.431	9.11252e-08
0.43	1.06862e-07
0.429	9.11252e-08
0.428	9.11252e-08
0.427	9.11252e-08
0.426	9.11252e-08
0.425	9.11252e-08
0.424	9.11252e-08
0.423	9.11252e-08
0.422	9.11252e-08
0.421	9.11252e-08
0.42	7.53888e-08
0.419	9.11252e-08
0.418	7.53888e-08
0.417	7.53888e-08
0.416	9.11252e-08
0.415	7.53888e-08
0.414	7.53888e-08
0.413	7.53888e-08
0.412	7.53888e-08
0.411	7.53888e-08
0.41	7.53888e-08
0.409	7.53888e-08
0.408	7.53888e-08
0.407	7.53888e-08
0.406	5.96525e-08
0.405	5.96525e-08
0.404	7.53888e-08
0.403	5.96525e-08
0.402	5.96525e-08
0.401	7.53888e-08
0.4	5.96525e-08
0.399	5.96525e-08
0.398	5.96525e-08
0.397	5.96525e-08
0.396	5.96525e-08
0.395	5.96525e-08
0.394	5.96525e-08
0.393	5.96525e-08
0.392	4.39161e-08
0.391	5.96525e-08
0.39	5.96525e-08
0.389	5.96525e-08
0.388	4.39161e-08
0.387	4.39161e-08
0.386	5.96525e-08
0.385	2.81797e-08
0.384	4.39161e-08
0.383	4.39161e-08
0.382	2.81797e-08
0.381	4.39161e-08
0.38	2.81797e-08
0.379	4.39161e-08
0.378	2.81797e-08
0.377	2.81797e-08
0.376	2.81797e-08
0.375	2.81797e-08
0.374	4.39161e-08
0.373	2.81797e-08
0.372	2.81797e-08
0.371	2.81797e-08
0.37	2.81797e-08
0.369	1.24434e-08
0.368	1.24434e-08
0.367	2.81797e-08
0.366	2.81797e-08
0.365	2.81797e-08
0.364	2.81797e-08
0.363	2.81797e-08
0.362	1.24434e-08
0.361	1.24434e-08
0.36	1.24434e-08
0.359	1.24434e-08
0.358	1.24434e-08
0.357	1.24434e-08
0.356	1.24434e-08
0.355	1.24434e-08
0.354	-3.29299e-09
0.353	-3.29299e-09
0.352	-3.29299e-09
0.351	-3.29299e-09
0.35	-3.29299e-09
0.349	-3.29299e-09
0.348	-3.29299e-09
0.347	-3.29299e-09
0.346	-3.29299e-09
0.345	-3.29299e-09
0.344	-1.90294e-08
0.343	-1.90294e-08
0.342	-1.90294e-08
0.341	-1.90294e-08
0.34	-1.90294e-08
0.339	-3.29299e-09
0.338	-3.29299e-09
0.337	-1.90294e-08
0.336	-1.90294e-08
0.335	-1.90294e-08
0.334	-1.90294e-08
0.333	-3.47657e-08
0.332	-1.90294e-08
0.331	-1.90294e-08
0.33	-1.90294e-08
0.329	-3.47657e-08
0.328	-3.47657e-08
0.327	-1.90294e-08
0.326	-3.47657e-08
0.325	-3.47657e-08
0.324	-3.47657e-08
0.323	-5.05021e-08
0.322	-3.47657e-08
0.321	-3.47657e-08
0.32	-5.05021e-08
0.319	-3.47657e-08
0.318	-5.05021e-08
0.317	-5.05021e-08
0.316	-5.05021e-08
0.315	-5.05021e-08
0.314	-5.05021e-08
0.313	-5.05021e-08
0.312	-6.62384e-08
0.311	-5.05021e-08
0.31	-6.62384e-08
0.309	-6.62384e-08
0.308	-6.62384e-08
0.307	-6.62384e-08
0.306	-6.62384e-08
0.305	-6.62384e-08
0.304	-6.62384e-08
0.303	-6.62384e-08
0.302	-6.62384e-08
0.301	-8.19748e-08
0.3	-6.62384e-08
0.299	-8.19748e-08
0.298	-8.19748e-08
0.297	-8.19748e-08
0.296	-9.77112e-08
0.295	-8.19748e-08
0.294	-9.77112e-08
0.293	-9.77112e-08
0.292	-9.77112e-08
0.291	-8.19748e-08
0.29	-8.19748e-08
0.289	-8.19748e-08
0.288	-9.77112e-08
0.287	-1.13448e-07
0.286	-9.77112e-08
0.285	-9.77112e-08
0.284	-1.13448e-07
0.283	-9.77112e-08
0.282	-8.19748e-08
0.281	-1.13448e-07
0.28	-1.13448e-07
0.279	-1.13448e-07
0.278	-1.13448e-07
0.277	-1.29184e-07
0.276	-1.13448e-07
0.275	-1.13448e-07
0.274	-1.13448e-07
0.273	-1.13448e-07
0.272	-1.13448e-07
0.271	-1.29184e-07
0.27	-1.29184e-07
0.269	-1.29184e-07
0.268	-1.13448e-07
0.267	-1.4492e-07
0.266	-1.29184e-07
0.265	-1.29184e-07
0.264	-1.29184e-07
0.263	-1.4492e-07
0.262	-1.29184e-07
0.261	-1.4492e-07
0.26	-1.4492e-07
0.259	-1.4492e-07
0.258	-1.4492e-07
0.257	-1.60657e-07
0.256	-1.4492e-07
0.255	-1.4492e-07
0.254	-1.4492e-07
0.253	-1.76393e-07
0.252	-1.76393e-07
0.251	-1.60657e-07
0.25	-1.76393e-07
0.249	-1.60657e-07
0.248	-1.60657e-07
0.247	-1.60657e-07
0.246	-1.76393e-07
0.245	-1.92129e-07
0.244	-1.76393e-07
0.243	-1.60657e-07
0.242	-1.60657e-07
0.241	-1.76393e-07
0.24	-1.92129e-07
0.239	-1.92129e-07
0.238	-1.92129e-07
0.237	-1.76393e-07
0.236	-1.76393e-07
0.235	-1.76393e-07
0.234	-2.07866e-07
0.233	-1.92129e-07
0.232	-1.76393e-07
0.231	-2.07866e-07
0.23	-1.92129e-07
0.229	-1.92129e-07
0.228	-2.23602e-07
0.227	-1.92129e-07
0.226	-2.23602e-07
0.225	-1.92129e-07
0.224	-2.07866e-07
0.223	-2.07866e-07
0.222	-2.07866e-07
0.221	-2.23602e-07
0.22	-2.07866e-07
0.219	-2.07866e-07
0.218	-2.39338e-07
0.217	-2.23602e-07
0.216	-2.07866e-07
0.215	-2.23602e-07
0.214	-2.39338e-07
0.213	-2.23602e-07
0.212	-2.23602e-07
0.211	-2.23602e-07
0.21	-2.23602e-07
0.209	-2.39338e-07
0.208	-2.39338e-07
0.207	-2.39338e-07
0.206	-2.39338e-07
0.205	-2.39338e-07
0.204	-2.55075e-07
0.203	-2.39338e-07
0.202	-2.55075e-07
0.201	-2.70811e-07
0.2	-2.55075e-07
0.199	-2.39338e-07
0.198	-2.55075e-07
0.197	-2.86548e-07
0.196	-2.55075e-07
0.195	-2.55075e-07
0.194	-2.86548e-07
0.193	-2.55075e-07
0.192	-2.86548e-07
0.191	-2.55075e-07
0.19	-2.86548e-07
0.189	-2.70811e-07
0.188	-3.02284e-07
0.187	-2.70811e-07
0.186	-2.70811e-07
0.185	-3.02284e-07
0.184	-2.70811e-07
0.183	-2.70811e-07
0.182	-3.02284e-07
0.181	-2.86548e-07
0.18	-2.86548e-07
0.179	-2.70811e-07
0.178	-3.02284e-07
0.177	-3.1802e-07
0.176	-3.1802e-07
0.175	-3.02284e-07
0.174	-3.02284e-07
0.173	-3.02284e-07
0.172	-3.02284e-07
0.171	-3.02284e-07
0.17	-3.02284e-07
0.169	-3.1802e-07
0.168	-3.1802e-07
0.167	-3.1802e-07
0.166	-3.33757e-07
0.165	-3.33757e-07
0.164	-3.02284e-07
0.163	-3.1802e-07
0.162	-3.33757e-07
0.161	-3.33757e-07
0.16	-3.1802e-07
0.159	-3.33757e-07
0.158	-3.49493e-07
0.157	-3.33757e-07
0.156	-3.33757e-07
0.155	-3.33757e-07
0.154	-3.49493e-07
0.153	-3.33757e-07
0.152	-3.49493e-07
0.151	-3.33757e-07
0.15	-3.65229e-07
0.149	-3.49493e-07
0.148	-3.65229e-07
0.147	-3.49493e-07
0.146	-3.49493e-07
0.145	-3.80966e-07
0.144	-3.49493e-07
0.143	-3.65229e-07
0.142	-3.65229e-07
0.141	-3.49493e-07
0.14	-3.80966e-07
0.139	-3.65229e-07
0.138	-3.65229e-07
0.137	-3.80966e-07
0.136	-3.80966e-07
0.135	-3.96702e-07
0.134	-3.65229e-07
0.133	-3.80966e-07
0.132	-3.80966e-07
0.131	-4.12438e-07
0.13	-4.12438e-07
0.129	-3.80966e-07
0.128	-3.80966e-07
0.127	-3.80966e-07
0.126	-3.80966e-07
0.125	-4.12438e-07
0.124	-3.80966e-07
0.123	-3.80966e-07
0.122	-4.28175e-07
0.121	-3.80966e-07
0.12	-3.96702e-07
0.119	-4.12438e-07
0.118	-3.80966e-07
0.117	-4.28175e-07
0.116	-3.96702e-07
0.115	-4.28175e-07
0.114	-3.96702e-07
0.113	-4.12438e-07
0.112	-3.96702e-07
0.111	-3.96702e-07
0.11	-4.43911e-07
0.109	-3.96702e-07
0.108	-3.96702e-07
0.107	-4.43911e-07
0.106	-4.12438e-07
0.105	-3.96702e-07
0.104	-3.96702e-07
0.103	-4.43911e-07
0.102	-4.43911e-07
0.101	-4.12438e-07
0.1	-3.96702e-07
0.099	-4.12438e-07
0.098	-4.12438e-07
0.097	-4.12438e-07
0.096	-4.12438e-07
0.095	-4.28175e-07
0.094	-4.12438e-07
0.093	-4.12438e-07
0.092	-4.12438e-07
0.091	-4.12438e-07
0.09	-4.59648e-07
0.089	-4.75384e-07
0.088	-4.28175e-07
0.087	-4.28175e-07
0.086	-4.12438e-07
0.085	-4.75384e-07
0.084	-4.28175e-07
0.083	-4.12438e-07
0.082	-4.9112e-07
0.081	-4.12438e-07
0.08	-4.59648e-07
0.079	-4.28175e-07
0.078	-4.28175e-07
0.077	-4.59648e-07
0.076	-4.59648e-07
0.075	-4.9112e-07
0.074	-4.43911e-07
0.073	-4.28175e-07
0.072	-4.28175e-07
0.071	-4.28175e-07
0.07	-4.43911e-07
0.069	-4.9112e-07
0.068	-5.06857e-07
0.067	-4.43911e-07
0.066	-4.28175e-07
0.065	-5.06857e-07
0.064	-4.9112e-07
0.063	-4.59648e-07
0.062	-4.43911e-07
0.061	-4.43911e-07
0.06	-4.28175e-07
0.059	-4.28175e-07
0.058	-4.28175e-07
0.057	-4.28175e-07
0.056	-4.28175e-07
0.055	-4.12438e-07
0.054	-4.43911e-07
0.053	-4.59648e-07
0.052	-4.59648e-07
0.051	-4.9112e-07
0.05	-5.22593e-07
0.049	-4.59648e-07
0.048	-4.43911e-07
0.047	-4.59648e-07
0.046	-5.06857e-07
0.045	-4.43911e-07
0.044	-4.59648e-07
0.043	-5.06857e-07
0.042	-4.43911e-07
0.041	-4.59648e-07
0.04	-5.38329e-07
0.039	-4.59648e-07
0.038	-5.22593e-07
0.037	-4.28175e-07
0.036	-5.22593e-07
0.035	-4.12438e-07
0.034	-5.06857e-07
0.033	-4.43911e-07
0.032	-5.38329e-07
0.031	-4.75384e-07
0.03	-4.12438e-07
0.029	-5.38329e-07
0.028	-4.75384e-07
0.027	-4.28175e-07
0.026	-5.38329e-07
0.025	-5.22593e-07
0.024	-4.75384e-07
0.023	-4.75384e-07
0.022	-4.28175e-07
0.021	-4.75384e-07
0.02	-4.9112e-07
0.019	-5.38329e-07
0.018	-5.54066e-07
0.017	-5.38329e-07
0.016	-5.38329e-07
0.015	-5.38329e-07
0.014	-5.38329e-07
0.013	-4.75384e-07
0.012	-4.43911e-07
0.011	-4.43911e-07
0.01	-4.59648e-07
0.009	-4.59648e-07
0.008	-5.06857e-07
0.007	-5.06857e-07
0.006	-4.9112e-07
0.005	-4.59648e-07
0.004	-4.59648e-07
0.003	-4.75384e-07
0.002	-4.43911e-07
0.001	-5.22593e-07
-1.24683e-17	-4.43911e-07
-0.001	-5.06857e-07
-0.002	-4.43911e-07
-0.003	-5.22593e-07
-0.004	-4.59648e-07
-0.005	-5.38329e-07
-0.006	-4.9112e-07
-0.007	-4.59648e-07
-0.008	-5.06857e-07
-0.009	-5.22593e-07
-0.01	-4.75384e-07
-0.011	-4.59648e-07
-0.012	-4.59648e-07
-0.013	-5.06857e-07
-0.014	-5.38329e-07
-0.015	-5.22593e-07
-0.016	-5.22593e-07
-0.017	-5.06857e-07
-0.018	-4.9112e-07
-0.019	-4.75384e-07
-0.02	-4.9112e-07
-0.021	-5.06857e-07
-0.022	-5.06857e-07
-0.023	-5.38329e-07
-0.024	-4.9112e-07
-0.025	-4.59648e-07
-0.026	-4.75384e-07
-0.027	-4.9112e-07
-0.028	-5.22593e-07
-0.029	-4.75384e-07
-0.03	-4.59648e-07
-0.031	-5.22593e-07
-0.032	-4.75384e-07
-0.033	-4.75384e-07
-0.034	-5.22593e-07
-0.035	-4.59648e-07
-0.036	-4.75384e-07
-0.037	-5.38329e-07
-0.038	-4.59648e-07
-0.039	-4.9112e-07
-0.04	-5.06857e-07
-0.041	-4.75384e-07
-0.042	-5.38329e-07
-0.043	-4.75384e-07
-0.044	-5.22593e-07
-0.045	-4.59648e-07
-0.046	-5.06857e-07
-0.047	-4.59648e-07
-0.048	-5.06857e-07
-0.049	-5.06857e-07
-0.05	-4.75384e-07
-0.051	-4.9112e-07
-0.052	-5.22593e-07
-0.053	-4.75384e-07
-0.054	-4.59648e-07
-0.055	-5.06857e-07
-0.056	-5.06857e-07
-0.057	-4.75384e-07
-0.058	-4.59648e-07
-0.059	-5.06857e-07
-0.06	-4.75384e-07
-0.061	-4.9112e-07
-0.062	-4.75384e-07
-0.063	-4.75384e-07
-0.064	-5.06857e-07
-0.065	-4.59648e-07
-0.066	-4.9112e-07
-0.067	-4.9112e-07
-0.068	-4.75384e-07
-0.069	-4.59648e-07
-0.07	-4.59648e-07
-0.071	-4.75384e-07
-0.072	-5.06857e-07
-0.073	-4.9112e-07
-0.074	-4.75384e-07
-0.075	-4.59648e-07
-0.076	-4.75384e-07
-0.077	-5.06857e-07
-0.078	-4.75384e-07
-0.079	-4.59648e-07
-0.08	-5.06857e-07
-0.081	-4.75384e-07
-0.082	-4.75384e-07
-0.083	-5.06857e-07
-0.084	-4.59648e-07
-0.085	-5.06857e-07
-0.086	-4.75384e-07
-0.087	-5.06857e-07
-0.088	-4.75384e-07
-0.089	-5.06857e-07
-0.09	-4.75384e-07
-0.091	-4.75384e-07
-0.092	-4.9112e-07
-0.093	-4.75384e-07
-0.094	-4.75384e-07
-0.095	-5.06857e-07
-0.096	-4.59648e-07
-0.097	-4.75384e-07
-0.098	-4.9112e-07
-0.099	-4.9112e-07
-0.1	-4.59648e-07
-0.101	-4.75384e-07
-0.102	-4.75384e-07
-0.103	-4.75384e-07
-0.104	-4.75384e-07
-0.105	-4.75384e-07
-0.106	-4.75384e-07
-0.107	-4.9112e-07
-0.108	-4.9112e-07
-0.109	-4.9112e-07
-0.11	-4.9112e-07
-0.111	-4.75384e-07
-0.112	-4.75384e-07
-0.113	-4.75384e-07
-0.114	-4.75384e-07
-0.115	-4.75384e-07
-0.116	-5.06857e-07
-0.117	-4.75384e-07
-0.118	-4.75384e-07
-0.119	-4.75384e-07
-0.12	-4.75384e-07
-0.121	-4.9112e-07
-0.122	-4.75384e-07
-0.123	-4.75384e-07
-0.124	-4.9112e-07
-0.125	-4.59648e-07
-0.126	-4.75384e-07
-0.127	-4.75384e-07
-0.128	-4.9112e-07
-0.129	-4.75384e-07
-0.13	-4.75384e-07
-0.131	-4.9112e-07
-0.132	-4.75384e-07
-0.133	-4.75384e-07
-0.134	-4.75384e-07
-0.135	-4.75384e-07
-0.136	-4.75384e-07
-0.137	-4.75384e-07
-0.138	-4.75384e-07
-0.139	-4.75384e-07
-0.14	-4.75384e-07
-0.141	-4.75384e-07
-0.142	-4.75384e-07
-0.143	-4.9112e-07
-0.144	-4.75384e-07
-0.145	-4.75384e-07
-0.146	-4.75384e-07
-0.147	-4.75384e-07
-0.148	-4.9112e-07
-0.149	-4.75384e-07
-0.15	-4.75384e-07
-0.151	-4.75384e-07
-0.152	-4.75384e-07
-0.153	-4.9112e-07
-0.154	-4.9112e-07
-0.155	-4.75384e-07
-0.156	-4.75384e-07
-0.157	-4.75384e-07
-0.158	-4.9112e-07
-0.159	-4.75384e-07
-0.16	-4.75384e-07
-0.161	-4.75384e-07
-0.162	-4.75384e-07
-0.163	-4.75384e-07
-0.164	-4.9112e-07
-0.165	-4.75384e-07
-0.166	-4.9112e-07
-0.167	-4.75384e-07
-0.168	-4.9112e-07
-0.169	-4.59648e-07
-0.17	-4.75384e-07
-0.171	-4.59648e-07
-0.172	-4.9112e-07
-0.173	-4.75384e-07
-0.174	-4.75384e-07
-0.175	-4.75384e-07
-0.176	-4.75384e-07
-0.177	-4.75384e-07
-0.178	-4.75384e-07
-0.179	-4.75384e-07
-0.18	-4.75384e-07
-0.181	-4.75384e-07
-0.182	-4.75384e-07
-0.183	-4.75384e-07
-0.184	-4.75384e-07
-0.185	-4.75384e-07
-0.186	-4.75384e-07
-0.187	-4.75384e-07
-0.188	-4.9112e-07
-0.189	-4.9112e-07
-0.19	-4.9112e-07
-0.191	-4.75384e-07
-0.192	-4.9112e-07
-0.193	-4.9112e-07
-0.194	-4.75384e-07
-0.195	-4.9112e-07
-0.196	-4.75384e-07
-0.197	-4.9112e-07
-0.198	-4.9112e-07
-0.199	-4.75384e-07
-0.2	-4.75384e-07
-0.201	-4.9112e-07
-0.202	-4.75384e-07
-0.203	-4.75384e-07
-0.204	-4.75384e-07
-0.205	-4.9112e-07
-0.206	-4.9112e-07
-0.207	-4.75384e-07
-0.208	-4.9112e-07
-0.209	-4.75384e-07
-0.21	-4.9112e-07
-0.211	-4.9112e-07
-0.212	-4.9112e-07
-0.213	-4.75384e-07
-0.214	-4.9112e-07
-0.215	-4.9112e-07
-0.216	-4.9112e-07
-0.217	-4.75384e-07
-0.218	-4.9112e-07
-0.219	-4.9112e-07
-0.22	-4.75384e-07
-0.221	-4.9112e-07
-0.222	-4.9112e-07
-0.223	-4.75384e-07
-0.224	-4.9112e-07
-0.225	-4.9112e-07
-0.226	-4.9112e-07
-0.227	-4.9112e-07
-0.228	-4.75384e-07
-0.229	-4.9112e-07
-0.23	-4.9112e-07
-0.231	-4.9112e-07
-0.232	-4.9112e-07
-0.233	-4.9112e-07
-0.234	-4.9112e-07
-0.235	-4.9112e-07
-0.236	-4.9112e-07
-0.237	-4.9112e-07
-0.238	-4.75384e-07
-0.239	-4.9112e-07
-0.24	-5.06857e-07
-0.241	-5.06857e-07
-0.242	-4.9112e-07
-0.243	-5.06857e-07
-0.244	-4.9112e-07
-0.245	-5.06857e-07
-0.246	-4.9112e-07
-0.247	-4.9112e-07
-0.248	-5.06857e-07
-0.249	-5.06857e-07
-0.25	-5.06857e-07
-0.251	-5.06857e-07
-0.252	-5.06857e-07
-0.253	-5.06857e-07
-0.254	-5.06857e-07
-0.255	-4.9112e-07
-0.256	-5.06857e-07
-0.257	-5.06857e-07
-0.258	-5.22593e-07
-0.259	-5.06857e-07
-0.26	-5.06857e-07
-0.261	-5.06857e-07
-0.262	-5.06857e-07
-0.263	-5.06857e-07
-0.264	-5.22593e-07
-0.265	-5.06857e-07
-0.266	-5.22593e-07
-0.267	-5.06857e-07
-0.268	-5.06857e-07
-0.269	-5.22593e-07
-0.27	-5.22593e-07
-0.271	-5.22593e-07
-0.272	-5.22593e-07
-0.273	-5.22593e-07
-0.274	-5.22593e-07
-0.275	-5.22593e-07
-0.276	-5.22593e-07
-0.277	-5.22593e-07
-0.278	-5.22593e-07
-0.279	-5.22593e-07
-0.28	-5.22593e-07
-0.281	-5.22593e-07
-0.282	-5.38329e-07
-0.283	-5.22593e-07
-0.284	-5.22593e-07
-0.285	-5.38329e-07
-0.286	-5.38329e-07
-0.287	-5.38329e-07
-0.288	-5.38329e-07
-0.289	-5.38329e-07
-0.29	-5.38329e-07
-0.291	-5.22593e-07
-0.292	-5.38329e-07
-0.293	-5.38329e-07
-0.294	-5.38329e-07
-0.295	-5.38329e-07
-0.296	-5.38329e-07
-0.297	-5.38329e-07
-0.298	-5.54066e-07
-0.299	-5.38329e-07
-0.3	-5.54066e-07
-0.301	-5.54066e-07
-0.302	-5.54066e-07
-0.303	-5.69802e-07
-0.304	-5.54066e-07
-0.305	-5.69802e-07
-0.306	-5.54066e-07
-0.307	-5.54066e-07
-0.308	-5.69802e-07
-0.309	-5.69802e-07
-0.31	-5.69802e-07
-0.311	-5.54066e-07
-0.312	-5.69802e-07
-0.313	-5.69802e-07
-0.314	-5.69802e-07
-0.315	-5.69802e-07
-0.316	-5.85538e-07
-0.317	-5.85538e-07
-0.318	-5.69802e-07
-0.319	-5.85538e-07
-0.32	-5.85538e-07
-0.321	-5.85538e-07
-0.322	-5.85538e-07
-0.323	-5.85538e-07
-0.324	-6.01275e-07
-0.325	-6.01275e-07
-0.326	-6.01275e-07
-0.327	-6.01275e-07
-0.328	-6.01275e-07
-0.329	-6.01275e-07
-0.33	-6.17011e-07
-0.331	-6.17011e-07
-0.332	-6.17011e-07
-0.333	-6.17011e-07
-0.334	-6.17011e-07
-0.335	-6.32748e-07
-0.336	-6.17011e-07
-0.337	-6.32748e-07
-0.338	-6.32748e-07
-0.339	-6.32748e-07
-0.34	-6.32748e-07
-0.341	-6.32748e-07
-0.342	-6.32748e-07
-0.343	-6.48484e-07
-0.344	-6.48484e-07
-0.345	-6.48484e-07
-0.346	-6.6422e-07
-0.347	-6.6422e-07
-0.348	-6.48484e-07
-0.349	-6.6422e-07
-0.35	-6.6422e-07
-0.351	-6.79957e-07
-0.352	-6.79957e-07
-0.353	-6.79957e-07
-0.354	-6.79957e-07
-0.355	-6.79957e-07
-0.356	-6.79957e-07
-0.357	-6.95693e-07
-0.358	-6.95693e-07
-0.359	-6.95693e-07
-0.36	-6.95693e-07
-0.361	-7.11429e-07
-0.362	-7.11429e-07
-0.363	-7.11429e-07
-0.364	-7.11429e-07
-0.365	-7.27166e-07
-0.366	-7.27166e-07
-0.367	-7.42902e-07
-0.368	-7.42902e-07
-0.369	-7.42902e-07
-0.37	-7.42902e-07
-0.371	-7.58639e-07
-0.372	-7.58639e-07
-0.373	-7.74375e-07
-0.374	-7.74375e-07
-0.375	-7.74375e-07
-0.376	-7.74375e-07
-0.377	-7.90111e-07
-0.378	-7.90111e-07
-0.379	-7.90111e-07
-0.38	-8.05848e-07
-0.381	-8.05848e-07
-0.382	-8.05848e-07
-0.383	-8.21584e-07
-0.384	-8.21584e-07
-0.385	-8.21584e-07
-0.386	-8.21584e-07
-0.387	-8.3732e-07
-0.388	-8.53057e-07
-0.389	-8.3732e-07
-0.39	-8.53057e-07
-0.391	-8.53057e-07
-0.392	-8.68793e-07
-0.393	-8.68793e-07
-0.394	-8.68793e-07
-0.395	-8.84529e-07
-0.396	-8.84529e-07
-0.397	-9.00266e-07
-0.398	-8.84529e-07
-0.399	-9.00266e-07
-0.4	-9.16002e-07
-0.401	-9.00266e-07
-0.402	-9.16002e-07
-0.403	-9.31739e-07
-0.404	-9.31739e-07
-0.405	-9.47475e-07
-0.406	-9.47475e-07
-0.407	-9.47475e-07
-0.408	-9.63211e-07
-0.409	-9.63211e-07
-0.41	-9.63211e-07
-0.411	-9.63211e-07
-0.412	-9.78948e-07
-0.413	-9.94684e-07
-0.414	-1.01042e-06
-0.415	-1.01042e-06
-0.416	-1.01042e-06
-0.417	-1.02616e-06
-0.418	-1.02616e-06
-0.419	-1.04189e-06
-0.42	-1.04189e-06
-0.421	-1.04189e-06
-0.422	-1.05763e-06
-0.423	-1.05763e-06
-0.424	-1.07337e-06
-0.425	-1.07337e-06
-0.426	-1.0891e-06
-0.427	-1.0891e-06
-0.428	-1.10484e-06
-0.429	-1.12057e-06
-0.43	-1.12057e-06
-0.431	-1.13631e-06
-0.432	-1.13631e-06
-0.433	-1.13631e-06
-0.434	-1.15205e-06
-0.435	-1.15205e-06
-0.436	-1.15205e-06
-0.437	-1.16778e-06
-0.438	-1.18352e-06
-0.439	-1.18352e-06
-0.44	-1.19926e-06
-0.441	-1.21499e-06
-0.442	-1.21499e-06
-0.443	-1.21499e-06
-0.444	-1.23073e-06
-0.445	-1.24647e-06
-0.446	-1.23073e-06
-0.447	-1.2622e-06
-0.448	-1.2622e-06
-0.449	-1.27794e-06
-0.45	-1.27794e-06
-0.451	-1.29367e-06
-0.452	-1.29367e-06
-0.453	-1.30941e-06
-0.454	-1.32515e-06
-0.455	-1.32515e-06
-0.456	-1.32515e-06
-0.457	-1.34088e-06
-0.458	-1.35662e-06
-0.459	-1.35662e-06
-0.46	-1.37236e-06
-0.461	-1.37236e-06
-0.462	-1.38809e-06
-0.463	-1.40383e-06
-0.464	-1.40383e-06
-0.465	-1.41957e-06
-0.466	-1.41957e-06
-0.467	-1.4353e-06
-0.468	-1.4353e-06
-0.469	-1.45104e-06
-0.47	-1.45104e-06
-0.471	-1.46677e-06
-0.472	-1.46677e-06
-0.473	-1.46677e-06
-0.474	-1.48251e-06
-0.475	-1.48251e-06
-0.476	-1.49825e-06
-0.477	-1.49825e-06
-0.478	-1.51398e-06
-0.479	-1.52972e-06
-0.48	-1.52972e-06
-0.481	-1.54546e-06
-0.482	-1.54546e-06
-0.483	-1.56119e-06
-0.484	-1.56119e-06
-0.485	-1.57693e-06
-0.486	-1.59267e-06
-0.487	-1.59267e-06
-0.488	-1.6084e-06
-0.489	-1.62414e-06
-0.49	-1.63987e-06
-0.491	-1.63987e-06
-0.492	-1.63987e-06
-0.493	-1.67135e-06
-0.494	-1.67135e-06
-0.495	-1.67135e-06
-0.496	-1.70282e-06
-0.497	-1.70282e-06
-0.498	-1.71856e-06
-0.499	-1.71856e-06
-0.5	-1.75003e-06
-0.501	-1.75003e-06
-0.502	-1.75003e-06
-0.503	-1.76577e-06
-0.504	-1.7815e-06
-0.505	-1.79724e-06
-0.506	-1.81297e-06
-0.507	-1.81297e-06
-0.508	-1.82871e-06
-0.509	-1.84445e-06
-0.51	-1.86018e-06
-0.511	-1.86018e-06
-0.512	-1.89166e-06
-0.513	-1.89166e-06
-0.514	-1.90739e-06
-0.515	-1.92313e-06
-0.516	-1.93887e-06
-0.517	-1.9546e-06
-0.518	-1.9546e-06
-0.519	-1.97034e-06
-0.52	-1.98607e-06
-0.521	-2.00181e-06
-0.522	-2.01755e-06
-0.523	-2.01755e-06
-0.524	-2.04902e-06
-0.525	-2.06476e-06
-0.526	-2.06476e-06
-0.527	-2.09623e-06
-0.528	-2.11197e-06
-0.529	-2.1277e-06
-0.53	-2.14344e-06
-0.531	-2.15917e-06
-0.532	-2.15917e-06
-0.533	-2.19065e-06
-0.534	-2.19065e-06
-0.535	-2.22212e-06
-0.536	-2.23786e-06
-0.537	-2.25359e-06
-0.538	-2.28507e-06
-0.539	-2.3008e-06
-0.54	-2.31654e-06
-0.541	-2.34801e-06
-0.542	-2.36375e-06
-0.543	-2.37948e-06
-0.544	-2.39522e-06
-0.545	-2.42669e-06
-0.546	-2.44243e-06
-0.547	-2.4739e-06
-0.548	-2.48964e-06
-0.549	-2.52111e-06
-0.55	-2.55258e-06
-0.551	-2.58406e-06
-0.552	-2.59979e-06
-0.553	-2.647e-06
-0.554	-2.66274e-06
-0.555	-2.72568e-06
-0.556	-2.74142e-06
-0.557	-2.80437e-06
-0.558	-2.8201e-06
-0.559	-2.86731e-06
-0.56	-2.91452e-06
-0.561	-2.97747e-06
-0.562	-3.00894e-06
-0.563	-3.07188e-06
-0.564	-3.11909e-06
-0.565	-3.18204e-06
-0.566	-3.22925e-06
-0.567	-3.30793e-06
-0.568	-3.37088e-06
-0.569	-3.49677e-06
-0.57	-3.49677e-06
-0.571	-3.52824e-06
-0.572	-3.66987e-06
-0.573	-3.74855e-06
-0.574	-3.82723e-06
-0.575	-3.93738e-06
-0.576	-4.0318e-06
-0.577	-4.15769e-06
-0.578	-4.28358e-06
-0.579	-4.378e-06
-0.58	-4.51963e-06
-0.581	-4.64552e-06
-0.582	-4.78715e-06
-0.583	-4.92878e-06
-0.584	-5.08614e-06
-0.585	-5.2435e-06
-0.586	-5.4166e-06
-0.587	-5.60544e-06
-0.588	-5.77854e-06
-0.589	-5.98311e-06
-0.59	-6.18768e-06
-0.591	-6.39226e-06
-0.592	-6.61257e-06
-0.593	-6.84861e-06
-0.594	-7.08466e-06
-0.595	-7.35218e-06
-0.596	-7.58822e-06
-0.597	-7.88721e-06
-0.598	-8.17047e-06
-0.599	-8.45372e-06
-0.6	-8.76845e-06
-0.601	-9.06744e-06
-0.602	-9.3979e-06
-0.603	-9.72837e-06
-0.604	-1.00903e-05
-0.605	-1.04365e-05
-0.606	-1.07984e-05
-0.607	-1.11761e-05
-0.608	-1.16482e-05
-0.609	-1.19629e-05
-0.61	-1.23721e-05
-0.611	-1.2797e-05
-0.612	-1.32218e-05
-0.613	-1.36625e-05
-0.614	-1.40873e-05
-0.615	-1.45437e-05
-0.616	-1.50158e-05
-0.617	-1.54721e-05
-0.618	-1.596e-05
-0.619	-1.64478e-05
-0.62	-1.69514e-05
-0.621	-1.74392e-05
-0.622	-1.79427e-05
-0.623	-1.84463e-05
-0.624	-1.89656e-05
-0.625	-1.94849e-05
-0.626	-1.99885e-05
-0.627	-2.05392e-05
-0.628	-2.11058e-05
-0.629	-2.16565e-05
-0.63	-2.21758e-05
-0.631	-2.27423e-05
-0.632	-2.32774e-05
-0.633	-2.37809e-05
-0.634	-2.43947e-05
-0.635	-2.49769e-05
-0.636	-2.55434e-05
-0.637	-2.61099e-05
-0.638	-2.66607e-05
-0.639	-2.72272e-05
-0.64	-2.77308e-05
-0.641	-2.8376e-05
-0.642	-2.89425e-05
-0.643	-2.95247e-05
-0.644	-3.00912e-05
-0.645	-3.0642e-05
-0.646	-3.12085e-05
-0.647	-3.16963e-05
-0.648	-3.23573e-05
-0.649	-3.2908e-05
-0.65	-3.34745e-05
-0.651	-3.40411e-05
-0.652	-3.46076e-05
-0.653	-3.51426e-05
-0.654	-3.57091e-05
-0.655	-3.62441e-05
-0.656	-3.67949e-05
-0.657	-3.733e-05
-0.658	-3.78493e-05
-0.659	-3.84e-05
-0.66	-3.89036e-05
-0.661	-3.94386e-05
-0.662	-3.98635e-05
-0.663	-4.04772e-05
-0.664	-4.09493e-05
-0.665	-4.14529e-05
-0.666	-4.19407e-05
-0.667	-4.24285e-05
-0.668	-4.29321e-05
-0.669	-4.33885e-05
-0.67	-4.3892e-05
-0.671	-4.43326e-05
-0.672	-4.4789e-05
-0.673	-4.52453e-05
-0.674	-4.56545e-05
-0.675	-4.60794e-05
-0.676	-4.652e-05
-0.677	-4.69449e-05
-0.678	-4.73225e-05
-0.679	-4.77317e-05
-0.68	-4.81408e-05
-0.681	-4.85185e-05
-0.682	-4.88804e-05
-0.683	-4.92581e-05
-0.684	-4.96201e-05
-0.685	-4.99663e-05
-0.686	-5.02967e-05
-0.687	-5.06272e-05
-0.688	-5.09419e-05
-0.689	-5.12566e-05
-0.69	-5.15714e-05
-0.691	-5.18546e-05
-0.692	-5.21536e-05
-0.693	-5.24054e-05
-0.694	-5.26572e-05
-0.695	-5.2909e-05
-0.696	-5.31607e-05
-0.697	-5.3381e-05
-0.698	-5.35856e-05
-0.699	-5.37902e-05
-0.7	-5.39948e-05
-0.701	-5.41836e-05
-0.702	-5.43567e-05
-0.703	-5.45298e-05
-0.704	-5.46714e-05
-0.705	-5.48288e-05
-0.706	-5.49389e-05
-0.707	-5.50648e-05
-0.708	-5.52065e-05
-0.709	-5.52851e-05
-0.71	-5.53638e-05
-0.711	-5.54582e-05
-0.712	-5.55369e-05
-0.713	-5.55999e-05
-0.714	-5.56313e-05
-0.715	-5.571e-05
-0.716	-5.56943e-05
-0.717	-5.57415e-05
-0.718	-5.57258e-05
-0.719	-5.57572e-05
-0.72	-5.57415e-05
-0.721	-5.56943e-05
-0.722	-5.56786e-05
-0.723	-5.56313e-05
-0.724	-5.55999e-05
-0.725	-5.55369e-05
-0.726	-5.5474e-05
-0.727	-5.5411e-05
-0.728	-5.53166e-05
-0.729	-5.52222e-05
-0.73	-5.51435e-05
-0.731	-5.50334e-05
-0.732	-5.49232e-05
-0.733	-5.48131e-05
-0.734	-5.46872e-05
-0.735	-5.45613e-05
-0.736	-5.44196e-05
-0.737	-5.4278e-05
-0.738	-5.41364e-05
-0.739	-5.3979e-05
-0.74	-5.38059e-05
-0.741	-5.36643e-05
-0.742	-5.34912e-05
-0.743	-5.33181e-05
-0.744	-5.31607e-05
-0.745	-5.29719e-05
-0.746	-5.28145e-05
-0.747	-5.26257e-05
-0.748	-5.24526e-05
-0.749	-5.22323e-05
-0.75	-5.20907e-05
-0.751	-5.19648e-05
-0.752	-5.165e-05
-0.753	-5.14769e-05
-0.754	-5.12881e-05
-0.755	-5.10835e-05
-0.756	-5.0879e-05
-0.757	-5.07059e-05
-0.758	-5.04856e-05
-0.759	-5.02967e-05
-0.76	-5.00921e-05
-0.761	-4.98876e-05
-0.762	-4.96987e-05
-0.763	-4.94942e-05
-0.764	-4.93053e-05
-0.765	-4.91008e-05
-0.766	-4.89119e-05
-0.767	-4.87231e-05
-0.768	-4.85028e-05
-0.769	-4.83139e-05
-0.77	-4.81251e-05
-0.771	-4.79835e-05
-0.772	-4.77632e-05
-0.773	-4.75586e-05
-0.774	-4.7354e-05
-0.775	-4.71809e-05
-0.776	-4.69763e-05
-0.777	-4.67875e-05
-0.778	-4.66144e-05
-0.779	-4.6457e-05
-0.78	-4.62682e-05
-0.781	-4.60951e-05
-0.782	-4.59063e-05
-0.783	-4.57489e-05
-0.784	-4.55758e-05
-0.785	-4.54184e-05
-0.786	-4.52453e-05
-0.787	-4.5088e-05
-0.788	-4.49306e-05
-0.789	-4.47733e-05
-0.79	-4.46316e-05
-0.791	-4.44743e-05
-0.792	-4.43326e-05
-0.793	-4.41753e-05
-0.794	-4.40336e-05
-0.795	-4.39707e-05
-0.796	-4.37347e-05
-0.797	-4.36717e-05
-0.798	-4.34986e-05
-0.799	-4.33885e-05
-0.8	-4.32468e-05
-0.799	-4.24915e-05
-0.798	-4.18935e-05
-0.797	-4.13742e-05
-0.796	-4.09021e-05
-0.795	-4.05087e-05
-0.794	-4.00996e-05
-0.793	-3.97691e-05
-0.792	-3.93442e-05
-0.791	-3.90137e-05
-0.79	-3.86833e-05
-0.789	-3.83843e-05
-0.788	-3.80696e-05
-0.787	-3.77548e-05
-0.786	-3.74873e-05
-0.785	-3.71883e-05
-0.784	-3.69208e-05
-0.783	-3.66533e-05
-0.782	-3.637e-05
-0.781	-3.61183e-05
-0.78	-3.58193e-05
-0.779	-3.55832e-05
-0.778	-3.53472e-05
-0.777	-3.51111e-05
-0.776	-3.48593e-05
-0.775	-3.46233e-05
-0.774	-3.43873e-05
-0.773	-3.41512e-05
-0.772	-3.39152e-05
-0.771	-3.36949e-05
-0.77	-3.34588e-05
-0.769	-3.32228e-05
-0.768	-3.30025e-05
-0.767	-3.27664e-05
-0.766	-3.25618e-05
-0.765	-3.23258e-05
-0.764	-3.21055e-05
-0.763	-3.18852e-05
-0.762	-3.17121e-05
-0.761	-3.14446e-05
-0.76	-3.12242e-05
-0.759	-3.09882e-05
-0.758	-3.07836e-05
-0.757	-3.05633e-05
-0.756	-3.0343e-05
-0.755	-3.01227e-05
-0.754	-2.99024e-05
-0.753	-2.96978e-05
-0.752	-2.94618e-05
-0.751	-2.92415e-05
-0.75	-2.90212e-05
-0.749	-2.88008e-05
-0.748	-2.85648e-05
-0.747	-2.83445e-05
-0.746	-2.81242e-05
-0.745	-2.78724e-05
-0.744	-2.76836e-05
-0.743	-2.74318e-05
-0.742	-2.71957e-05
-0.741	-2.69597e-05
-0.74	-2.67394e-05
-0.739	-2.64876e-05
-0.738	-2.62515e-05
-0.737	-2.60155e-05
-0.736	-2.57637e-05
-0.735	-2.55277e-05
-0.734	-2.52759e-05
-0.733	-2.50241e-05
-0.732	-2.47723e-05
-0.731	-2.45205e-05
-0.73	-2.4253e-05
-0.729	-2.40012e-05
-0.728	-2.37967e-05
-0.727	-2.34662e-05
-0.726	-2.31987e-05
-0.725	-2.29312e-05
-0.724	-2.26479e-05
-0.723	-2.23961e-05
-0.722	-2.21129e-05
-0.721	-2.18296e-05
-0.72	-2.15464e-05
-0.719	-2.12631e-05
-0.718	-2.09641e-05
-0.717	-2.06651e-05
-0.716	-2.03661e-05
-0.715	-2.00672e-05
-0.714	-1.9721e-05
-0.713	-1.94849e-05
-0.712	-1.91387e-05
-0.711	-1.8824e-05
-0.71	-1.84935e-05
-0.709	-1.81788e-05
-0.708	-1.78483e-05
-0.707	-1.75336e-05
-0.706	-1.72031e-05
-0.705	-1.68727e-05
-0.704	-1.65107e-05
-0.703	-1.61803e-05
-0.702	-1.58341e-05
-0.701	-1.54721e-05
-0.7	-1.51102e-05
-0.699	-1.47483e-05
-0.698	-1.44021e-05
-0.697	-1.40244e-05
-0.696	-1.36467e-05
-0.695	-1.3269e-05
-0.694	-1.29071e-05
-0.693	-1.25137e-05
-0.692	-1.21203e-05
-0.691	-1.17111e-05
-0.69	-1.13335e-05
-0.689	-1.09401e-05
-0.688	-1.05309e-05
-0.687	-1.01375e-05
-0.686	-9.71263e-06
-0.685	-9.30348e-06
-0.684	-8.8786e-06
-0.683	-8.46946e-06
-0.682	-8.04458e-06
-0.681	-7.57248e-06
-0.68	-7.17908e-06
-0.679	-6.73846e-06
-0.678	-6.31358e-06
-0.677	-5.87296e-06
-0.676	-5.43234e-06
-0.675	-4.99172e-06
-0.674	-4.51963e-06
-0.673	-4.07901e-06
-0.672	-3.60692e-06
-0.671	-3.15057e-06
-0.67	-2.67848e-06
-0.669	-2.22212e-06
-0.668	-1.75003e-06
-0.667	-1.30941e-06
-0.666	-8.21584e-07
-0.665	-3.65229e-07
-0.664	1.22598e-07
-0.663	6.41898e-07
-0.662	1.09825e-06
-0.661	1.57034e-06
-0.66	2.05817e-06
-0.659	2.56173e-06
-0.658	3.04956e-06
-0.657	3.52165e-06
-0.656	4.00948e-06
-0.655	4.60746e-06
-0.654	5.03234e-06
-0.653	5.52017e-06
-0.652	6.02373e-06
-0.651	6.5273e-06
-0.65	7.03086e-06
-0.649	7.53443e-06
-0.648	8.02225e-06
-0.647	8.55729e-06
-0.646	9.02938e-06
-0.645	9.54868e-06
-0.644	1.00365e-05
-0.643	1.05401e-05
-0.642	1.10436e-05
-0.641	1.15315e-05
-0.64	1.20508e-05
-0.639	1.25386e-05
-0.638	1.30264e-05
-0.637	1.353e-05
-0.636	1.40178e-05
-0.635	1.45214e-05
-0.634	1.49935e-05
-0.633	1.54813e-05
-0.632	1.59691e-05
-0.631	1.64727e-05
-0.63	1.6929e-05
-0.629	1.74011e-05
-0.628	1.78732e-05
-0.627	1.83453e-05
-0.626	1.88017e-05
-0.625	1.9258e-05
-0.624	1.97144e-05
-0.623	2.01707e-05
-0.622	2.05956e-05
-0.621	2.1052e-05
-0.62	2.15083e-05
-0.619	2.19175e-05
-0.618	2.23266e-05
-0.617	2.27515e-05
-0.616	2.31449e-05
-0.615	2.35698e-05
-0.614	2.39475e-05
-0.613	2.43409e-05
-0.612	2.46871e-05
-0.611	2.50805e-05
-0.61	2.54424e-05
-0.609	2.57729e-05
-0.608	2.61033e-05
-0.607	2.64495e-05
-0.606	2.67643e-05
-0.605	2.70633e-05
-0.604	2.73622e-05
-0.603	2.76455e-05
-0.602	2.7913e-05
-0.601	2.81648e-05
-0.6	2.84008e-05
-0.599	2.86526e-05
-0.598	2.88887e-05
-0.597	2.90775e-05
-0.596	2.92821e-05
-0.595	2.94394e-05
-0.594	2.95968e-05
-0.593	2.97542e-05
-0.592	2.98643e-05
-0.591	2.99745e-05
-0.59	3.00689e-05
-0.589	3.01633e-05
-0.588	3.02263e-05
-0.587	3.02735e-05
-0.586	3.03049e-05
-0.585	3.03049e-05
-0.584	3.03049e-05
-0.583	3.02735e-05
-0.582	3.0242e-05
-0.581	3.01791e-05
-0.58	3.01318e-05
-0.579	3.00374e-05
-0.578	2.9943e-05
-0.577	2.98014e-05
-0.576	2.96755e-05
-0.575	2.95181e-05
-0.574	2.93608e-05
-0.573	2.92034e-05
-0.572	2.90146e-05
-0.571	2.88572e-05
-0.57	2.85739e-05
-0.569	2.84008e-05
-0.568	2.81648e-05
-0.567	2.7913e-05
-0.566	2.76927e-05
-0.565	2.74409e-05
-0.564	2.71891e-05
-0.563	2.69216e-05
-0.562	2.66698e-05
-0.561	2.63866e-05
-0.56	2.61348e-05
-0.559	2.58516e-05
-0.558	2.5584e-05
-0.557	2.53008e-05
-0.556	2.50333e-05
-0.555	2.475e-05
-0.554	2.44982e-05
-0.553	2.4215e-05
-0.552	2.39317e-05
-0.551	2.36642e-05
-0.55	2.34124e-05
-0.549	2.31449e-05
-0.548	2.28931e-05
-0.547	2.26256e-05
-0.546	2.23738e-05
-0.545	2.2122e-05
-0.544	2.18703e-05
-0.543	2.16499e-05
-0.542	2.13982e-05
-0.541	2.11621e-05
-0.54	2.09418e-05
-0.539	2.07372e-05
-0.538	2.05012e-05
-0.537	2.02494e-05
-0.536	2.00448e-05
-0.535	1.98403e-05
-0.534	1.96357e-05
-0.533	1.94311e-05
-0.532	1.92265e-05
-0.531	1.90377e-05
-0.53	1.88331e-05
-0.529	1.866e-05
-0.528	1.84712e-05
-0.527	1.82824e-05
-0.526	1.81093e-05
-0.525	1.79204e-05
-0.524	1.77631e-05
-0.523	1.76057e-05
-0.522	1.74483e-05
-0.521	1.72752e-05
-0.52	1.71179e-05
-0.519	1.69448e-05
-0.518	1.67874e-05
-0.517	1.66773e-05
-0.516	1.64569e-05
-0.515	1.63625e-05
-0.514	1.62209e-05
-0.513	1.60793e-05
-0.512	1.59219e-05
-0.511	1.5796e-05
-0.51	1.56701e-05
-0.509	1.55285e-05
-0.508	1.54026e-05
-0.507	1.52925e-05
-0.506	1.51508e-05
-0.505	1.50249e-05
-0.504	1.49148e-05
-0.503	1.48046e-05
-0.502	1.46787e-05
-0.501	1.45843e-05
-0.5	1.44742e-05
-0.499	1.43483e-05
-0.498	1.42539e-05
-0.497	1.4128e-05
-0.496	1.40335e-05
-0.495	1.39234e-05
-0.494	1.38132e-05
-0.493	1.37188e-05
-0.492	1.36244e-05
-0.491	1.353e-05
-0.49	1.34356e-05
-0.489	1.33411e-05
-0.488	1.32467e-05
-0.487	1.31366e-05
-0.486	1.30579e-05
-0.485	1.29635e-05
-0.484	1.28691e-05
-0.483	1.27746e-05
-0.482	1.26645e-05
-0.481	1.25701e-05
-0.48	1.24756e-05
-0.479	1.24442e-05
-0.478	1.23498e-05
-0.477	1.22711e-05
-0.476	1.21924e-05
-0.475	1.21137e-05
-0.474	1.20193e-05
-0.473	1.19406e-05
-0.472	1.18619e-05
-0.471	1.1799e-05
-0.47	1.17203e-05
-0.469	1.16574e-05
-0.468	1.15944e-05
-0.467	1.15157e-05
-0.466	1.1437e-05
-0.465	1.13584e-05
-0.464	1.12954e-05
-0.463	1.12167e-05
-0.462	1.11538e-05
-0.461	1.10908e-05
-0.46	1.10122e-05
-0.459	1.09492e-05
-0.458	1.08705e-05
-0.457	1.08076e-05
-0.456	1.07446e-05
-0.455	1.06817e-05
-0.454	1.06345e-05
-0.453	1.05715e-05
-0.452	1.05086e-05
-0.451	1.04457e-05
-0.45	1.0367e-05
-0.449	1.03198e-05
-0.448	1.02568e-05
-0.447	1.01939e-05
-0.446	1.01467e-05
-0.445	1.00837e-05
-0.444	1.00208e-05
-0.443	9.97356e-06
-0.442	9.91062e-06
-0.441	9.84767e-06
-0.44	9.80046e-06
-0.439	9.73752e-06
-0.438	9.69031e-06
-0.437	9.6431e-06
-0.436	9.59589e-06
-0.435	9.53294e-06
-0.434	9.48574e-06
-0.433	9.43853e-06
-0.432	9.37558e-06
-0.431	9.32837e-06
-0.43	9.28116e-06
-0.429	9.23395e-06
-0.428	9.18674e-06
-0.427	9.13954e-06
-0.426	9.09233e-06
-0.425	9.02938e-06
-0.424	8.98217e-06
-0.423	8.93496e-06
-0.422	8.88775e-06
-0.421	8.84054e-06
-0.42	8.79334e-06
-0.419	8.74613e-06
-0.418	8.69892e-06
-0.417	8.65171e-06
-0.416	8.66744e-06
-0.415	8.55729e-06
-0.414	8.55729e-06
-0.413	8.51008e-06
-0.412	8.47861e-06
-0.411	8.38419e-06
-0.41	8.35272e-06
-0.409	8.32124e-06
-0.408	8.28977e-06
-0.407	8.22683e-06
-0.406	8.19535e-06
-0.405	8.14814e-06
-0.404	8.11667e-06
-0.403	8.06946e-06
-0.402	8.02225e-06
-0.401	7.97504e-06
-0.4	7.94357e-06
-0.399	7.9121e-06
-0.398	7.86489e-06
-0.397	7.83342e-06
-0.396	7.80194e-06
-0.395	7.75473e-06
-0.394	7.72326e-06
-0.393	7.67605e-06
-0.392	7.64458e-06
-0.391	7.59737e-06
-0.39	7.5659e-06
-0.389	7.53443e-06
-0.388	7.50295e-06
-0.387	7.47148e-06
-0.386	7.44001e-06
-0.385	7.40853e-06
-0.384	7.36133e-06
-0.383	7.32985e-06
-0.382	7.29838e-06
-0.381	7.25117e-06
-0.38	7.2197e-06
-0.379	7.18823e-06
-0.378	7.15675e-06
-0.377	7.12528e-06
-0.376	7.07807e-06
-0.375	7.06233e-06
-0.374	7.03086e-06
-0.373	6.98365e-06
-0.372	6.95218e-06
-0.371	6.92071e-06
-0.37	6.88923e-06
-0.369	6.85776e-06
-0.368	6.82629e-06
-0.367	6.79482e-06
-0.366	6.76334e-06
-0.365	6.73187e-06
-0.364	6.7004e-06
-0.363	6.66893e-06
-0.362	6.63745e-06
-0.361	6.62172e-06
-0.36	6.57451e-06
-0.359	6.55877e-06
-0.358	6.5273e-06
-0.357	6.49583e-06
-0.356	6.46435e-06
-0.355	6.43288e-06
-0.354	6.41714e-06
-0.353	6.38567e-06
-0.352	6.3542e-06
-0.351	6.32273e-06
-0.35	6.29125e-06
-0.349	6.25978e-06
-0.348	6.24404e-06
-0.347	6.21257e-06
-0.346	6.1811e-06
-0.345	6.14963e-06
-0.344	6.11815e-06
-0.343	6.10242e-06
-0.342	6.07094e-06
-0.341	6.03947e-06
-0.34	6.02373e-06
-0.339	5.99226e-06
-0.338	5.96079e-06
-0.337	5.94505e-06
-0.336	5.91358e-06
-0.335	5.88211e-06
-0.334	5.86637e-06
-0.333	5.8349e-06
-0.332	5.80343e-06
-0.331	5.78769e-06
-0.33	5.77195e-06
-0.329	5.74048e-06
-0.328	5.70901e-06
-0.327	5.69327e-06
-0.326	5.6618e-06
-0.325	5.64606e-06
-0.324	5.63033e-06
-0.323	5.59885e-06
-0.322	5.58312e-06
-0.321	5.55164e-06
-0.32	5.53591e-06
-0.319	5.50443e-06
-0.318	5.4887e-06
-0.317	5.45723e-06
-0.316	5.44149e-06
-0.315	5.42575e-06
-0.314	5.39428e-06
-0.313	5.37854e-06
-0.312	5.34707e-06
-0.311	5.3156e-06
-0.31	5.29986e-06
-0.309	5.26839e-06
-0.308	5.25265e-06
-0.307	5.23692e-06
-0.306	5.22118e-06
-0.305	5.18971e-06
-0.304	5.17397e-06
-0.303	5.1425e-06
-0.302	5.12676e-06
-0.301	5.09529e-06
-0.3	5.07955e-06
-0.299	5.06382e-06
-0.298	5.04808e-06
-0.297	5.01661e-06
-0.296	5.00087e-06
-0.295	4.98513e-06
-0.294	4.95366e-06
-0.293	4.93793e-06
-0.292	4.90645e-06
-0.291	4.89072e-06
-0.29	4.87498e-06
-0.289	4.85924e-06
-0.288	4.82777e-06
-0.287	4.81203e-06
-0.286	4.7963e-06
-0.285	4.76483e-06
-0.284	4.74909e-06
-0.283	4.73335e-06
-0.282	4.71762e-06
-0.281	4.68614e-06
-0.28	4.68614e-06
-0.279	4.65467e-06
-0.278	4.6232e-06
-0.277	4.6232e-06
-0.276	4.59173e-06
-0.275	4.57599e-06
-0.274	4.59173e-06
-0.273	4.51304e-06
-0.272	4.48157e-06
-0.271	4.54452e-06
-0.27	4.49731e-06
-0.269	4.51304e-06
-0.268	4.48157e-06
-0.267	4.40289e-06
-0.266	4.43436e-06
-0.265	4.40289e-06
-0.264	4.37142e-06
-0.263	4.32421e-06
-0.262	4.37142e-06
-0.261	4.35568e-06
-0.26	4.32421e-06
-0.259	4.30847e-06
-0.258	4.29273e-06
-0.257	4.277e-06
-0.256	4.26126e-06
-0.255	4.24553e-06
-0.254	4.22979e-06
-0.253	4.22979e-06
-0.252	4.19832e-06
-0.251	4.18258e-06
-0.25	4.16684e-06
-0.249	4.15111e-06
-0.248	4.13537e-06
-0.247	4.11963e-06
-0.246	4.1039e-06
-0.245	4.08816e-06
-0.244	4.07243e-06
-0.243	4.05669e-06
-0.242	4.04095e-06
-0.241	4.04095e-06
-0.24	4.00948e-06
-0.239	4.00948e-06
-0.238	3.99374e-06
-0.237	3.97801e-06
-0.236	3.96227e-06
-0.235	3.94653e-06
-0.234	3.9308e-06
-0.233	3.91506e-06
-0.232	3.91506e-06
-0.231	3.89933e-06
-0.23	3.88359e-06
-0.229	3.86785e-06
-0.228	3.85212e-06
-0.227	3.83638e-06
-0.226	3.82064e-06
-0.225	3.82064e-06
-0.224	3.78917e-06
-0.223	3.78917e-06
-0.222	3.77343e-06
-0.221	3.7577e-06
-0.22	3.74196e-06
-0.219	3.74196e-06
-0.218	3.72623e-06
-0.217	3.71049e-06
-0.216	3.71049e-06
-0.215	3.69475e-06
-0.214	3.67902e-06
-0.213	3.66328e-06
-0.212	3.66328e-06
-0.211	3.64754e-06
-0.21	3.63181e-06
-0.209	3.61607e-06
-0.208	3.61607e-06
-0.207	3.60033e-06
-0.206	3.60033e-06
-0.205	3.5846e-06
-0.204	3.56886e-06
-0.203	3.56886e-06
[truncated: 802 more rows]

## Sheet: O2 raw data
Potential	Pt under 21% O2
E / vs. Ag/AgCl	i / A
0.6	3.42907e-07
0.599	3.42907e-07
0.598	3.11434e-07
0.597	3.11434e-07
0.596	3.27171e-07
0.595	2.79962e-07
0.594	3.11434e-07
0.593	2.79962e-07
0.592	3.11434e-07
0.591	2.64225e-07
0.59	2.79962e-07
0.589	2.79962e-07
0.588	3.11434e-07
0.587	2.79962e-07
0.586	2.95698e-07
0.585	2.79962e-07
0.584	2.48489e-07
0.583	2.48489e-07
0.582	2.79962e-07
0.581	2.64225e-07
0.58	2.64225e-07
0.579	2.32752e-07
0.578	2.32752e-07
0.577	2.32752e-07
0.576	2.64225e-07
0.575	2.48489e-07
0.574	2.64225e-07
0.573	2.17016e-07
0.572	2.48489e-07
0.571	2.32752e-07
0.57	2.48489e-07
0.569	2.0128e-07
0.568	2.32752e-07
0.567	2.32752e-07
0.566	2.17016e-07
0.565	2.32752e-07
0.564	2.48489e-07
0.563	2.17016e-07
0.562	2.32752e-07
0.561	2.17016e-07
0.56	2.17016e-07
0.559	2.32752e-07
0.558	2.32752e-07
0.557	2.32752e-07
0.556	2.0128e-07
0.555	2.32752e-07
0.554	2.0128e-07
0.553	2.0128e-07
0.552	2.0128e-07
0.551	2.0128e-07
0.55	2.0128e-07
0.549	2.0128e-07
0.548	2.17016e-07
0.547	2.0128e-07
0.546	2.0128e-07
0.545	2.17016e-07
0.544	2.0128e-07
0.543	1.85543e-07
0.542	1.85543e-07
0.541	1.85543e-07
0.54	1.85543e-07
0.539	1.85543e-07
0.538	1.69807e-07
0.537	1.69807e-07
0.536	1.85543e-07
0.535	1.85543e-07
0.534	1.69807e-07
0.533	1.69807e-07
0.532	1.69807e-07
0.531	1.69807e-07
0.53	1.69807e-07
0.529	2.0128e-07
0.528	1.69807e-07
0.527	1.69807e-07
0.526	1.69807e-07
0.525	1.69807e-07
0.524	1.69807e-07
0.523	1.69807e-07
0.522	1.54071e-07
0.521	1.69807e-07
0.52	1.69807e-07
0.519	1.54071e-07
0.518	1.54071e-07
0.517	1.54071e-07
0.516	1.69807e-07
0.515	1.54071e-07
0.514	1.54071e-07
0.513	1.54071e-07
0.512	1.54071e-07
0.511	1.54071e-07
0.51	1.54071e-07
0.509	1.38334e-07
0.508	1.38334e-07
0.507	1.38334e-07
0.506	1.38334e-07
0.505	1.38334e-07
0.504	1.38334e-07
0.503	1.38334e-07
0.502	1.38334e-07
0.501	1.38334e-07
0.5	1.38334e-07
0.499	1.38334e-07
0.498	1.38334e-07
0.497	1.38334e-07
0.496	1.22598e-07
0.495	1.22598e-07
0.494	1.22598e-07
0.493	1.22598e-07
0.492	1.22598e-07
0.491	1.22598e-07
0.49	1.22598e-07
0.489	1.22598e-07
0.488	1.06862e-07
0.487	1.22598e-07
0.486	1.22598e-07
0.485	1.06862e-07
0.484	1.06862e-07
0.483	1.06862e-07
0.482	1.06862e-07
0.481	1.06862e-07
0.48	1.06862e-07
0.479	1.06862e-07
0.478	1.06862e-07
0.477	1.06862e-07
0.476	1.06862e-07
0.475	1.06862e-07
0.474	9.11252e-08
0.473	9.11252e-08
0.472	1.06862e-07
0.471	9.11252e-08
0.47	9.11252e-08
0.469	9.11252e-08
0.468	9.11252e-08
0.467	9.11252e-08
0.466	9.11252e-08
0.465	9.11252e-08
0.464	9.11252e-08
0.463	9.11252e-08
0.462	7.53888e-08
0.461	7.53888e-08
0.46	7.53888e-08
0.459	7.53888e-08
0.458	7.53888e-08
0.457	7.53888e-08
0.456	7.53888e-08
0.455	7.53888e-08
0.454	7.53888e-08
0.453	5.96525e-08
0.452	5.96525e-08
0.451	5.96525e-08
0.45	5.96525e-08
0.449	5.96525e-08
0.448	5.96525e-08
0.447	5.96525e-08
0.446	5.96525e-08
0.445	5.96525e-08
0.444	5.96525e-08
0.443	5.96525e-08
0.442	5.96525e-08
0.441	4.39161e-08
0.44	4.39161e-08
0.439	4.39161e-08
0.438	4.39161e-08
0.437	4.39161e-08
0.436	4.39161e-08
0.435	4.39161e-08
0.434	4.39161e-08
0.433	2.81797e-08
0.432	2.81797e-08
0.431	2.81797e-08
0.43	4.39161e-08
0.429	2.81797e-08
0.428	2.81797e-08
0.427	2.81797e-08
0.426	2.81797e-08
0.425	2.81797e-08
0.424	2.81797e-08
0.423	2.81797e-08
0.422	2.81797e-08
0.421	2.81797e-08
0.42	1.24434e-08
0.419	1.24434e-08
0.418	1.24434e-08
0.417	1.24434e-08
0.416	1.24434e-08
0.415	1.24434e-08
0.414	1.24434e-08
0.413	-3.29299e-09
0.412	-3.29299e-09
0.411	-3.29299e-09
0.41	-3.29299e-09
0.409	-3.29299e-09
0.408	-3.29299e-09
0.407	-3.29299e-09
0.406	-1.90294e-08
0.405	-3.29299e-09
0.404	-1.90294e-08
0.403	-1.90294e-08
0.402	-1.90294e-08
0.401	-1.90294e-08
0.4	-1.90294e-08
0.399	-1.90294e-08
0.398	-1.90294e-08
0.397	-1.90294e-08
0.396	-3.47657e-08
0.395	-3.47657e-08
0.394	-3.47657e-08
0.393	-3.47657e-08
0.392	-3.47657e-08
0.391	-3.47657e-08
0.39	-3.47657e-08
0.389	-5.05021e-08
0.388	-5.05021e-08
0.387	-5.05021e-08
0.386	-5.05021e-08
0.385	-5.05021e-08
0.384	-5.05021e-08
0.383	-6.62384e-08
0.382	-6.62384e-08
0.381	-6.62384e-08
0.38	-6.62384e-08
0.379	-6.62384e-08
0.378	-6.62384e-08
0.377	-6.62384e-08
0.376	-6.62384e-08
0.375	-8.19748e-08
0.374	-8.19748e-08
0.373	-8.19748e-08
0.372	-8.19748e-08
0.371	-8.19748e-08
0.37	-8.19748e-08
0.369	-8.19748e-08
0.368	-9.77112e-08
0.367	-9.77112e-08
0.366	-9.77112e-08
0.365	-9.77112e-08
0.364	-9.77112e-08
0.363	-9.77112e-08
0.362	-9.77112e-08
0.361	-1.13448e-07
0.36	-1.13448e-07
0.359	-1.13448e-07
0.358	-1.13448e-07
0.357	-1.13448e-07
0.356	-1.29184e-07
0.355	-1.29184e-07
0.354	-1.29184e-07
0.353	-1.29184e-07
0.352	-1.29184e-07
0.351	-1.4492e-07
0.35	-1.4492e-07
0.349	-1.4492e-07
0.348	-1.4492e-07
0.347	-1.4492e-07
0.346	-1.4492e-07
0.345	-1.4492e-07
0.344	-1.60657e-07
0.343	-1.60657e-07
0.342	-1.60657e-07
0.341	-1.60657e-07
0.34	-1.76393e-07
0.339	-1.76393e-07
0.338	-1.76393e-07
0.337	-1.76393e-07
0.336	-1.92129e-07
0.335	-1.92129e-07
0.334	-1.92129e-07
0.333	-1.92129e-07
0.332	-1.92129e-07
0.331	-2.07866e-07
0.33	-2.07866e-07
0.329	-2.07866e-07
0.328	-2.07866e-07
0.327	-2.23602e-07
0.326	-2.07866e-07
0.325	-2.23602e-07
0.324	-2.23602e-07
0.323	-2.23602e-07
0.322	-2.39338e-07
0.321	-2.39338e-07
0.32	-2.39338e-07
0.319	-2.55075e-07
0.318	-2.55075e-07
0.317	-2.55075e-07
0.316	-2.55075e-07
0.315	-2.70811e-07
0.314	-2.70811e-07
0.313	-2.70811e-07
0.312	-2.86548e-07
0.311	-2.86548e-07
0.31	-2.86548e-07
0.309	-2.86548e-07
0.308	-3.02284e-07
0.307	-3.02284e-07
0.306	-3.02284e-07
0.305	-3.1802e-07
0.304	-3.1802e-07
0.303	-3.1802e-07
0.302	-3.33757e-07
0.301	-3.1802e-07
0.3	-3.33757e-07
0.299	-3.33757e-07
0.298	-3.49493e-07
0.297	-3.49493e-07
0.296	-3.49493e-07
0.295	-3.65229e-07
0.294	-3.65229e-07
0.293	-3.80966e-07
0.292	-3.65229e-07
0.291	-3.80966e-07
0.29	-3.80966e-07
0.289	-3.80966e-07
0.288	-3.96702e-07
0.287	-3.96702e-07
0.286	-4.12438e-07
0.285	-4.12438e-07
0.284	-4.12438e-07
0.283	-4.28175e-07
0.282	-4.28175e-07
0.281	-4.43911e-07
0.28	-4.43911e-07
0.279	-4.43911e-07
0.278	-4.59648e-07
0.277	-4.59648e-07
0.276	-4.75384e-07
0.275	-4.75384e-07
0.274	-4.75384e-07
0.273	-4.9112e-07
0.272	-4.9112e-07
0.271	-5.06857e-07
0.27	-5.06857e-07
0.269	-5.22593e-07
0.268	-5.22593e-07
0.267	-5.38329e-07
0.266	-5.38329e-07
0.265	-5.54066e-07
0.264	-5.54066e-07
0.263	-5.54066e-07
0.262	-5.69802e-07
0.261	-5.69802e-07
0.26	-5.85538e-07
0.259	-5.85538e-07
0.258	-6.01275e-07
0.257	-6.17011e-07
0.256	-6.17011e-07
0.255	-6.32748e-07
0.254	-6.48484e-07
0.253	-6.48484e-07
0.252	-6.6422e-07
0.251	-6.6422e-07
0.25	-6.79957e-07
0.249	-6.95693e-07
0.248	-6.95693e-07
0.247	-7.11429e-07
0.246	-7.27166e-07
0.245	-7.27166e-07
0.244	-7.42902e-07
0.243	-7.58639e-07
0.242	-7.58639e-07
0.241	-7.74375e-07
0.24	-7.74375e-07
0.239	-8.05848e-07
0.238	-8.05848e-07
0.237	-8.21584e-07
0.236	-8.3732e-07
0.235	-8.53057e-07
0.234	-8.68793e-07
0.233	-8.68793e-07
0.232	-8.84529e-07
0.231	-9.00266e-07
0.23	-9.00266e-07
0.229	-9.31739e-07
0.228	-9.31739e-07
0.227	-9.47475e-07
0.226	-9.63211e-07
0.225	-9.78948e-07
0.224	-9.94684e-07
0.223	-1.01042e-06
0.222	-1.02616e-06
0.221	-1.04189e-06
0.22	-1.05763e-06
0.219	-1.07337e-06
0.218	-1.0891e-06
0.217	-1.10484e-06
0.216	-1.12057e-06
0.215	-1.13631e-06
0.214	-1.15205e-06
0.213	-1.16778e-06
0.212	-1.18352e-06
0.211	-1.19926e-06
0.21	-1.21499e-06
0.209	-1.23073e-06
0.208	-1.2622e-06
0.207	-1.2622e-06
0.206	-1.29367e-06
0.205	-1.30941e-06
0.204	-1.32515e-06
0.203	-1.34088e-06
0.202	-1.35662e-06
0.201	-1.38809e-06
0.2	-1.40383e-06
0.199	-1.41957e-06
0.198	-1.4353e-06
0.197	-1.45104e-06
0.196	-1.46677e-06
0.195	-1.48251e-06
0.194	-1.49825e-06
0.193	-1.52972e-06
0.192	-1.54546e-06
0.191	-1.56119e-06
0.19	-1.59267e-06
0.189	-1.62414e-06
0.188	-1.63987e-06
0.187	-1.65561e-06
0.186	-1.68708e-06
0.185	-1.70282e-06
0.184	-1.73429e-06
0.183	-1.75003e-06
0.182	-1.7815e-06
0.181	-1.79724e-06
0.18	-1.82871e-06
0.179	-1.86018e-06
0.178	-1.87592e-06
0.177	-1.90739e-06
0.176	-1.93887e-06
0.175	-1.9546e-06
0.174	-1.98607e-06
0.173	-2.01755e-06
0.172	-2.04902e-06
0.171	-2.06476e-06
0.17	-2.09623e-06
0.169	-2.1277e-06
0.168	-2.15917e-06
0.167	-2.17491e-06
0.166	-2.20638e-06
0.165	-2.23786e-06
0.164	-2.26933e-06
0.163	-2.3008e-06
0.162	-2.31654e-06
0.161	-2.34801e-06
0.16	-2.37948e-06
0.159	-2.41096e-06
0.158	-2.44243e-06
0.157	-2.45817e-06
0.156	-2.48964e-06
0.155	-2.52111e-06
0.154	-2.55258e-06
0.153	-2.56832e-06
0.152	-2.59979e-06
0.151	-2.63127e-06
0.15	-2.66274e-06
0.149	-2.69421e-06
0.148	-2.72568e-06
0.147	-2.75716e-06
0.146	-2.78863e-06
0.145	-2.8201e-06
0.144	-2.85158e-06
0.143	-2.88305e-06
0.142	-2.91452e-06
0.141	-2.94599e-06
0.14	-2.96173e-06
0.139	-3.00894e-06
0.138	-3.04041e-06
0.137	-3.05615e-06
0.136	-3.08762e-06
0.135	-3.11909e-06
0.134	-3.15057e-06
0.133	-3.1663e-06
0.132	-3.19778e-06
0.131	-3.22925e-06
0.13	-3.26072e-06
0.129	-3.29219e-06
0.128	-3.32367e-06
0.127	-3.35514e-06
0.126	-3.38661e-06
0.125	-3.41808e-06
0.124	-3.40235e-06
0.123	-3.44956e-06
0.122	-3.46529e-06
0.121	-3.54398e-06
0.12	-3.5125e-06
0.119	-3.57545e-06
0.118	-3.57545e-06
0.117	-3.63839e-06
0.116	-3.60692e-06
0.115	-3.63839e-06
0.114	-3.6856e-06
0.113	-3.6856e-06
0.112	-3.73281e-06
0.111	-3.74855e-06
0.11	-3.78002e-06
0.109	-3.81149e-06
0.108	-3.81149e-06
0.107	-3.82723e-06
0.106	-3.8587e-06
0.105	-3.87444e-06
0.104	-3.89018e-06
0.103	-3.92165e-06
0.102	-3.93738e-06
0.101	-3.95312e-06
0.1	-3.96886e-06
0.099	-3.98459e-06
0.098	-3.98459e-06
0.097	-4.01607e-06
0.096	-4.0318e-06
0.095	-4.04754e-06
0.094	-4.06328e-06
0.093	-4.07901e-06
0.092	-4.09475e-06
0.091	-4.09475e-06
0.09	-4.11048e-06
0.089	-4.12622e-06
0.088	-4.14196e-06
0.087	-4.14196e-06
0.086	-4.15769e-06
0.085	-4.17343e-06
0.084	-4.17343e-06
0.083	-4.18917e-06
0.082	-4.18917e-06
0.081	-4.2049e-06
0.08	-4.2049e-06
0.079	-4.22064e-06
0.078	-4.22064e-06
0.077	-4.22064e-06
0.076	-4.23638e-06
0.075	-4.23638e-06
0.074	-4.23638e-06
0.073	-4.25211e-06
0.072	-4.25211e-06
0.071	-4.25211e-06
0.07	-4.25211e-06
0.069	-4.25211e-06
0.068	-4.26785e-06
0.067	-4.26785e-06
0.066	-4.26785e-06
0.065	-4.26785e-06
0.064	-4.26785e-06
0.063	-4.26785e-06
0.062	-4.25211e-06
0.061	-4.26785e-06
0.06	-4.26785e-06
0.059	-4.25211e-06
0.058	-4.25211e-06
0.057	-4.25211e-06
0.056	-4.25211e-06
0.055	-4.23638e-06
0.054	-4.25211e-06
0.053	-4.23638e-06
0.052	-4.23638e-06
0.051	-4.23638e-06
0.05	-4.22064e-06
0.049	-4.22064e-06
0.048	-4.22064e-06
0.047	-4.22064e-06
0.046	-4.2049e-06
0.045	-4.2049e-06
0.044	-4.18917e-06
0.043	-4.18917e-06
0.042	-4.17343e-06
0.041	-4.17343e-06
0.04	-4.17343e-06
0.039	-4.17343e-06
0.038	-4.14196e-06
0.037	-4.14196e-06
0.036	-4.14196e-06
0.035	-4.12622e-06
0.034	-4.12622e-06
0.033	-4.12622e-06
0.032	-4.11048e-06
0.031	-4.11048e-06
0.03	-4.09475e-06
0.029	-4.07901e-06
0.028	-4.07901e-06
0.027	-4.06328e-06
0.026	-4.06328e-06
0.025	-4.04754e-06
0.024	-4.04754e-06
0.023	-4.0318e-06
0.022	-4.01607e-06
0.021	-4.01607e-06
0.02	-4.00033e-06
0.019	-3.98459e-06
0.018	-3.98459e-06
0.017	-3.96886e-06
0.016	-3.96886e-06
0.015	-3.95312e-06
0.014	-3.93738e-06
0.013	-3.93738e-06
0.012	-3.92165e-06
0.011	-3.92165e-06
0.01	-3.90591e-06
0.009	-3.89018e-06
0.008	-3.89018e-06
0.007	-3.87444e-06
0.006	-3.87444e-06
0.005	-3.8587e-06
0.004	-3.84297e-06
0.003	-3.82723e-06
0.002	-3.81149e-06
0.001	-3.81149e-06
-1.24683e-17	-3.82723e-06
-0.001	-3.81149e-06
-0.002	-3.79576e-06
-0.003	-3.78002e-06
-0.004	-3.78002e-06
-0.005	-3.76428e-06
-0.006	-3.74855e-06
-0.007	-3.73281e-06
-0.008	-3.71708e-06
-0.009	-3.70134e-06
-0.01	-3.70134e-06
-0.011	-3.66987e-06
-0.012	-3.71708e-06
-0.013	-3.66987e-06
-0.014	-3.70134e-06
-0.015	-3.70134e-06
-0.016	-3.63839e-06
-0.017	-3.65413e-06
-0.018	-3.63839e-06
-0.019	-3.60692e-06
-0.02	-3.62266e-06
-0.021	-3.62266e-06
-0.022	-3.60692e-06
-0.023	-3.59118e-06
-0.024	-3.55971e-06
-0.025	-3.57545e-06
-0.026	-3.52824e-06
-0.027	-3.5125e-06
-0.028	-3.49677e-06
-0.029	-3.55971e-06
-0.03	-3.49677e-06
-0.031	-3.54398e-06
-0.032	-3.46529e-06
-0.033	-3.52824e-06
-0.034	-3.49677e-06
-0.035	-3.48103e-06
-0.036	-3.49677e-06
-0.037	-3.44956e-06
-0.038	-3.46529e-06
-0.039	-3.44956e-06
-0.04	-3.44956e-06
-0.041	-3.43382e-06
-0.042	-3.43382e-06
-0.043	-3.41808e-06
-0.044	-3.44956e-06
-0.045	-3.41808e-06
-0.046	-3.40235e-06
-0.047	-3.40235e-06
-0.048	-3.38661e-06
-0.049	-3.37088e-06
-0.05	-3.37088e-06
-0.051	-3.37088e-06
-0.052	-3.37088e-06
-0.053	-3.35514e-06
-0.054	-3.3394e-06
-0.055	-3.3394e-06
-0.056	-3.3394e-06
-0.057	-3.32367e-06
-0.058	-3.32367e-06
-0.059	-3.30793e-06
-0.06	-3.30793e-06
-0.061	-3.29219e-06
-0.062	-3.27646e-06
-0.063	-3.27646e-06
-0.064	-3.27646e-06
-0.065	-3.26072e-06
-0.066	-3.26072e-06
-0.067	-3.24498e-06
-0.068	-3.24498e-06
-0.069	-3.22925e-06
-0.07	-3.22925e-06
-0.071	-3.22925e-06
-0.072	-3.21351e-06
-0.073	-3.19778e-06
-0.074	-3.19778e-06
-0.075	-3.19778e-06
-0.076	-3.19778e-06
-0.077	-3.18204e-06
-0.078	-3.18204e-06
-0.079	-3.1663e-06
-0.08	-3.1663e-06
-0.081	-3.1663e-06
-0.082	-3.15057e-06
-0.083	-3.13483e-06
-0.084	-3.13483e-06
-0.085	-3.13483e-06
-0.086	-3.11909e-06
-0.087	-3.11909e-06
-0.088	-3.11909e-06
-0.089	-3.10336e-06
-0.09	-3.10336e-06
-0.091	-3.10336e-06
-0.092	-3.08762e-06
-0.093	-3.08762e-06
-0.094	-3.08762e-06
-0.095	-3.07188e-06
-0.096	-3.05615e-06
-0.097	-3.05615e-06
-0.098	-3.04041e-06
-0.099	-3.05615e-06
-0.1	-3.04041e-06
-0.101	-3.04041e-06
-0.102	-3.02468e-06
-0.103	-3.02468e-06
-0.104	-3.02468e-06
-0.105	-3.02468e-06
-0.106	-3.00894e-06
-0.107	-3.00894e-06
-0.108	-3.00894e-06
-0.109	-2.9932e-06
-0.11	-2.9932e-06
-0.111	-2.97747e-06
-0.112	-2.97747e-06
-0.113	-2.97747e-06
-0.114	-2.96173e-06
-0.115	-2.96173e-06
-0.116	-2.96173e-06
-0.117	-2.94599e-06
-0.118	-2.94599e-06
-0.119	-2.94599e-06
-0.12	-2.94599e-06
-0.121	-2.93026e-06
-0.122	-2.93026e-06
-0.123	-2.93026e-06
-0.124	-2.91452e-06
-0.125	-2.91452e-06
-0.126	-2.91452e-06
-0.127	-2.91452e-06
-0.128	-2.89878e-06
-0.129	-2.89878e-06
-0.13	-2.89878e-06
-0.131	-2.88305e-06
-0.132	-2.88305e-06
-0.133	-2.88305e-06
-0.134	-2.86731e-06
-0.135	-2.86731e-06
-0.136	-2.86731e-06
-0.137	-2.85158e-06
-0.138	-2.85158e-06
-0.139	-2.85158e-06
-0.14	-2.85158e-06
-0.141	-2.85158e-06
-0.142	-2.83584e-06
-0.143	-2.83584e-06
-0.144	-2.83584e-06
-0.145	-2.83584e-06
-0.146	-2.8201e-06
-0.147	-2.8201e-06
-0.148	-2.8201e-06
-0.149	-2.80437e-06
-0.15	-2.80437e-06
-0.151	-2.80437e-06
-0.152	-2.80437e-06
-0.153	-2.78863e-06
-0.154	-2.78863e-06
-0.155	-2.78863e-06
-0.156	-2.78863e-06
-0.157	-2.78863e-06
-0.158	-2.77289e-06
-0.159	-2.77289e-06
-0.16	-2.77289e-06
-0.161	-2.77289e-06
-0.162	-2.75716e-06
-0.163	-2.75716e-06
-0.164	-2.75716e-06
-0.165	-2.74142e-06
-0.166	-2.74142e-06
-0.167	-2.74142e-06
-0.168	-2.74142e-06
-0.169	-2.74142e-06
-0.17	-2.74142e-06
-0.171	-2.72568e-06
-0.172	-2.72568e-06
-0.173	-2.72568e-06
-0.174	-2.70995e-06
-0.175	-2.72568e-06
-0.176	-2.70995e-06
-0.177	-2.70995e-06
-0.178	-2.70995e-06
-0.179	-2.69421e-06
-0.18	-2.70995e-06
-0.181	-2.69421e-06
-0.182	-2.69421e-06
-0.183	-2.67848e-06
-0.184	-2.69421e-06
-0.185	-2.67848e-06
-0.186	-2.67848e-06
-0.187	-2.67848e-06
-0.188	-2.67848e-06
-0.189	-2.67848e-06
-0.19	-2.66274e-06
-0.191	-2.67848e-06
-0.192	-2.66274e-06
-0.193	-2.66274e-06
-0.194	-2.66274e-06
-0.195	-2.647e-06
-0.196	-2.647e-06
-0.197	-2.647e-06
-0.198	-2.647e-06
-0.199	-2.647e-06
-0.2	-2.63127e-06
-0.201	-2.647e-06
-0.202	-2.63127e-06
-0.203	-2.63127e-06
-0.204	-2.63127e-06
-0.205	-2.63127e-06
-0.206	-2.61553e-06
-0.207	-2.61553e-06
-0.208	-2.61553e-06
-0.209	-2.61553e-06
-0.21	-2.61553e-06
-0.211	-2.61553e-06
-0.212	-2.61553e-06
-0.213	-2.61553e-06
-0.214	-2.59979e-06
-0.215	-2.59979e-06
-0.216	-2.59979e-06
-0.217	-2.58406e-06
-0.218	-2.59979e-06
-0.219	-2.59979e-06
-0.22	-2.58406e-06
-0.221	-2.58406e-06
-0.222	-2.59979e-06
-0.223	-2.58406e-06
-0.224	-2.58406e-06
-0.225	-2.58406e-06
-0.226	-2.58406e-06
-0.227	-2.56832e-06
-0.228	-2.56832e-06
-0.229	-2.56832e-06
-0.23	-2.56832e-06
-0.231	-2.56832e-06
-0.232	-2.56832e-06
-0.233	-2.56832e-06
-0.234	-2.56832e-06
-0.235	-2.56832e-06
-0.236	-2.55258e-06
-0.237	-2.55258e-06
-0.238	-2.55258e-06
-0.239	-2.55258e-06
-0.24	-2.55258e-06
-0.241	-2.55258e-06
-0.242	-2.55258e-06
-0.243	-2.53685e-06
-0.244	-2.53685e-06
-0.245	-2.55258e-06
-0.246	-2.53685e-06
-0.247	-2.53685e-06
-0.248	-2.53685e-06
-0.249	-2.53685e-06
-0.25	-2.53685e-06
-0.251	-2.53685e-06
-0.252	-2.53685e-06
-0.253	-2.52111e-06
-0.254	-2.53685e-06
-0.255	-2.52111e-06
-0.256	-2.52111e-06
-0.257	-2.52111e-06
-0.258	-2.52111e-06
-0.259	-2.52111e-06
-0.26	-2.52111e-06
-0.261	-2.52111e-06
-0.262	-2.52111e-06
-0.263	-2.52111e-06
-0.264	-2.52111e-06
-0.265	-2.52111e-06
-0.266	-2.52111e-06
-0.267	-2.52111e-06
-0.268	-2.50538e-06
-0.269	-2.50538e-06
-0.27	-2.52111e-06
-0.271	-2.50538e-06
-0.272	-2.50538e-06
-0.273	-2.50538e-06
-0.274	-2.50538e-06
-0.275	-2.50538e-06
-0.276	-2.50538e-06
-0.277	-2.50538e-06
-0.278	-2.50538e-06
-0.279	-2.50538e-06
-0.28	-2.50538e-06
-0.281	-2.50538e-06
-0.282	-2.50538e-06
-0.283	-2.50538e-06
-0.284	-2.50538e-06
-0.285	-2.50538e-06
-0.286	-2.50538e-06
-0.287	-2.50538e-06
-0.288	-2.48964e-06
-0.289	-2.48964e-06
-0.29	-2.50538e-06
-0.291	-2.50538e-06
-0.292	-2.50538e-06
-0.293	-2.50538e-06
-0.294	-2.50538e-06
-0.295	-2.50538e-06
-0.296	-2.50538e-06
-0.297	-2.50538e-06
-0.298	-2.50538e-06
-0.299	-2.50538e-06
-0.3	-2.50538e-06
-0.301	-2.50538e-06
-0.302	-2.50538e-06
-0.303	-2.50538e-06
-0.304	-2.50538e-06
-0.305	-2.52111e-06
-0.306	-2.52111e-06
-0.307	-2.50538e-06
-0.308	-2.52111e-06
-0.309	-2.52111e-06
-0.31	-2.52111e-06
-0.311	-2.52111e-06
-0.312	-2.52111e-06
-0.313	-2.50538e-06
-0.314	-2.50538e-06
-0.315	-2.52111e-06
-0.316	-2.52111e-06
-0.317	-2.52111e-06
-0.318	-2.52111e-06
-0.319	-2.52111e-06
-0.32	-2.53685e-06
-0.321	-2.52111e-06
-0.322	-2.52111e-06
-0.323	-2.52111e-06
-0.324	-2.52111e-06
-0.325	-2.53685e-06
-0.326	-2.53685e-06
-0.327	-2.53685e-06
-0.328	-2.53685e-06
-0.329	-2.53685e-06
-0.33	-2.53685e-06
-0.331	-2.53685e-06
-0.332	-2.53685e-06
-0.333	-2.55258e-06
-0.334	-2.55258e-06
-0.335	-2.55258e-06
-0.336	-2.55258e-06
-0.337	-2.55258e-06
-0.338	-2.56832e-06
-0.339	-2.56832e-06
-0.34	-2.56832e-06
-0.341	-2.56832e-06
-0.342	-2.56832e-06
-0.343	-2.56832e-06
-0.344	-2.56832e-06
-0.345	-2.56832e-06
-0.346	-2.58406e-06
-0.347	-2.58406e-06
-0.348	-2.58406e-06
-0.349	-2.58406e-06
-0.35	-2.58406e-06
-0.351	-2.58406e-06
-0.352	-2.58406e-06
-0.353	-2.58406e-06
-0.354	-2.58406e-06
-0.355	-2.59979e-06
-0.356	-2.59979e-06
-0.357	-2.61553e-06
-0.358	-2.61553e-06
-0.359	-2.61553e-06
-0.36	-2.61553e-06
-0.361	-2.61553e-06
-0.362	-2.61553e-06
-0.363	-2.61553e-06
-0.364	-2.61553e-06
-0.365	-2.63127e-06
-0.366	-2.63127e-06
-0.367	-2.63127e-06
-0.368	-2.63127e-06
-0.369	-2.647e-06
-0.37	-2.63127e-06
-0.371	-2.647e-06
-0.372	-2.647e-06
-0.373	-2.647e-06
-0.374	-2.647e-06
-0.375	-2.647e-06
-0.376	-2.66274e-06
-0.377	-2.647e-06
-0.378	-2.647e-06
-0.379	-2.66274e-06
-0.38	-2.66274e-06
-0.381	-2.66274e-06
-0.382	-2.67848e-06
-0.383	-2.67848e-06
-0.384	-2.67848e-06
-0.385	-2.67848e-06
-0.386	-2.67848e-06
-0.387	-2.67848e-06
-0.388	-2.67848e-06
-0.389	-2.67848e-06
-0.39	-2.69421e-06
-0.391	-2.69421e-06
-0.392	-2.69421e-06
-0.393	-2.70995e-06
-0.394	-2.69421e-06
-0.395	-2.69421e-06
-0.396	-2.70995e-06
-0.397	-2.70995e-06
-0.398	-2.70995e-06
-0.399	-2.72568e-06
-0.4	-2.72568e-06
-0.401	-2.72568e-06
-0.402	-2.72568e-06
-0.403	-2.72568e-06
-0.404	-2.74142e-06
-0.405	-2.72568e-06
-0.406	-2.74142e-06
-0.407	-2.74142e-06
-0.408	-2.74142e-06
-0.409	-2.74142e-06
-0.41	-2.74142e-06
-0.411	-2.74142e-06
-0.412	-2.75716e-06
-0.413	-2.75716e-06
-0.414	-2.75716e-06
-0.415	-2.75716e-06
-0.416	-2.77289e-06
-0.417	-2.77289e-06
-0.418	-2.77289e-06
-0.419	-2.78863e-06
-0.42	-2.77289e-06
-0.421	-2.78863e-06
-0.422	-2.78863e-06
-0.423	-2.78863e-06
-0.424	-2.78863e-06
-0.425	-2.80437e-06
-0.426	-2.80437e-06
-0.427	-2.80437e-06
-0.428	-2.8201e-06
-0.429	-2.8201e-06
-0.43	-2.8201e-06
-0.431	-2.8201e-06
-0.432	-2.83584e-06
-0.433	-2.83584e-06
-0.434	-2.83584e-06
-0.435	-2.83584e-06
-0.436	-2.85158e-06
-0.437	-2.85158e-06
-0.438	-2.85158e-06
-0.439	-2.85158e-06
-0.44	-2.86731e-06
-0.441	-2.86731e-06
-0.442	-2.85158e-06
-0.443	-2.86731e-06
-0.444	-2.88305e-06
-0.445	-2.88305e-06
-0.446	-2.88305e-06
-0.447	-2.89878e-06
-0.448	-2.89878e-06
-0.449	-2.89878e-06
-0.45	-2.89878e-06
-0.451	-2.91452e-06
-0.452	-2.91452e-06
-0.453	-2.93026e-06
-0.454	-2.91452e-06
-0.455	-2.93026e-06
-0.456	-2.93026e-06
-0.457	-2.94599e-06
-0.458	-2.94599e-06
-0.459	-2.96173e-06
-0.46	-2.96173e-06
-0.461	-2.96173e-06
-0.462	-2.97747e-06
-0.463	-2.97747e-06
-0.464	-2.9932e-06
-0.465	-2.9932e-06
-0.466	-2.9932e-06
-0.467	-3.00894e-06
-0.468	-3.00894e-06
-0.469	-3.02468e-06
-0.47	-3.02468e-06
-0.471	-3.02468e-06
-0.472	-3.04041e-06
-0.473	-3.05615e-06
-0.474	-3.05615e-06
-0.475	-3.05615e-06
-0.476	-3.07188e-06
-0.477	-3.07188e-06
-0.478	-3.08762e-06
-0.479	-3.08762e-06
-0.48	-3.10336e-06
-0.481	-3.10336e-06
-0.482	-3.11909e-06
-0.483	-3.11909e-06
-0.484	-3.13483e-06
-0.485	-3.13483e-06
-0.486	-3.13483e-06
-0.487	-3.15057e-06
-0.488	-3.1663e-06
-0.489	-3.1663e-06
-0.49	-3.18204e-06
-0.491	-3.18204e-06
-0.492	-3.19778e-06
-0.493	-3.21351e-06
-0.494	-3.21351e-06
-0.495	-3.22925e-06
-0.496	-3.22925e-06
-0.497	-3.24498e-06
-0.498	-3.26072e-06
-0.499	-3.26072e-06
-0.5	-3.26072e-06
-0.501	-3.27646e-06
-0.502	-3.27646e-06
-0.503	-3.27646e-06
-0.504	-3.30793e-06
-0.505	-3.30793e-06
-0.506	-3.30793e-06
-0.507	-3.3394e-06
-0.508	-3.3394e-06
-0.509	-3.37088e-06
-0.51	-3.3394e-06
-0.511	-3.37088e-06
-0.512	-3.38661e-06
-0.513	-3.38661e-06
-0.514	-3.38661e-06
-0.515	-3.38661e-06
-0.516	-3.43382e-06
-0.517	-3.43382e-06
-0.518	-3.41808e-06
-0.519	-3.46529e-06
-0.52	-3.44956e-06
-0.521	-3.46529e-06
-0.522	-3.46529e-06
-0.523	-3.46529e-06
-0.524	-3.49677e-06
-0.525	-3.52824e-06
-0.526	-3.46529e-06
-0.527	-3.54398e-06
-0.528	-3.54398e-06
-0.529	-3.54398e-06
-0.53	-3.55971e-06
-0.531	-3.60692e-06
-0.532	-3.59118e-06
-0.533	-3.60692e-06
-0.534	-3.60692e-06
-0.535	-3.62266e-06
-0.536	-3.65413e-06
-0.537	-3.63839e-06
-0.538	-3.6856e-06
-0.539	-3.70134e-06
-0.54	-3.70134e-06
-0.541	-3.76428e-06
-0.542	-3.73281e-06
-0.543	-3.76428e-06
-0.544	-3.79576e-06
-0.545	-3.81149e-06
-0.546	-3.79576e-06
-0.547	-3.81149e-06
-0.548	-3.84297e-06
-0.549	-3.87444e-06
-0.55	-3.90591e-06
-0.551	-3.92165e-06
-0.552	-3.95312e-06
-0.553	-3.96886e-06
-0.554	-4.00033e-06
-0.555	-4.01607e-06
-0.556	-4.04754e-06
-0.557	-4.07901e-06
-0.558	-4.12622e-06
-0.559	-4.15769e-06
-0.56	-4.18917e-06
-0.561	-4.23638e-06
-0.562	-4.26785e-06
-0.563	-4.29932e-06
-0.564	-4.34653e-06
-0.565	-4.39374e-06
-0.566	-4.44095e-06
-0.567	-4.48816e-06
-0.568	-4.5511e-06
-0.569	-4.59831e-06
-0.57	-4.64552e-06
-0.571	-4.7242e-06
-0.572	-4.80288e-06
-0.573	-4.86583e-06
-0.574	-4.96025e-06
-0.575	-5.02319e-06
-0.576	-5.13335e-06
-0.577	-5.21203e-06
-0.578	-5.32218e-06
-0.579	-5.40087e-06
-0.58	-5.51102e-06
-0.581	-5.62118e-06
-0.582	-5.74707e-06
-0.583	-5.88869e-06
-0.584	-6.01458e-06
-0.585	-6.15621e-06
-0.586	-6.31358e-06
-0.587	-6.47094e-06
-0.588	-6.64404e-06
-0.589	-6.8014e-06
-0.59	-7.00598e-06
-0.591	-7.19481e-06
-0.592	-7.39938e-06
-0.593	-7.60396e-06
-0.594	-7.82427e-06
-0.595	-8.07605e-06
-0.596	-8.32783e-06
-0.597	-8.56388e-06
-0.598	-8.83139e-06
-0.599	-9.11465e-06
-0.6	-9.3979e-06
-0.601	-9.69689e-06
-0.602	-9.99588e-06
-0.603	-1.03263e-05
-0.604	-1.06568e-05
-0.605	-1.1003e-05
-0.606	-1.13649e-05
-0.607	-1.17269e-05
-0.608	-1.20888e-05
-0.609	-1.2498e-05
-0.61	-1.28756e-05
-0.611	-1.33005e-05
-0.612	-1.37097e-05
-0.613	-1.41503e-05
-0.614	-1.45594e-05
-0.615	-1.50158e-05
-0.616	-1.55036e-05
-0.617	-1.596e-05
-0.618	-1.64321e-05
-0.619	-1.69199e-05
-0.62	-1.74077e-05
-0.621	-1.78955e-05
-0.622	-1.84148e-05
-0.623	-1.89341e-05
-0.624	-1.94534e-05
-0.625	-1.99727e-05
-0.626	-2.05078e-05
-0.627	-2.10585e-05
-0.628	-2.15936e-05
-0.629	-2.21601e-05
-0.63	-2.26951e-05
-0.631	-2.32616e-05
-0.632	-2.38439e-05
-0.633	-2.43947e-05
-0.634	-2.49612e-05
-0.635	-2.55119e-05
-0.636	-2.60942e-05
-0.637	-2.66607e-05
-0.638	-2.72429e-05
-0.639	-2.78252e-05
-0.64	-2.83917e-05
-0.641	-2.89897e-05
-0.642	-2.95562e-05
-0.643	-3.01384e-05
-0.644	-3.07364e-05
-0.645	-3.13187e-05
-0.646	-3.19009e-05
-0.647	-3.24517e-05
-0.648	-3.30025e-05
-0.649	-3.35847e-05
-0.65	-3.41512e-05
-0.651	-3.47177e-05
-0.652	-3.52842e-05
-0.653	-3.59294e-05
-0.654	-3.64172e-05
-0.655	-3.6968e-05
-0.656	-3.75188e-05
-0.657	-3.80381e-05
-0.658	-3.85731e-05
-0.659	-3.90924e-05
-0.66	-3.96432e-05
-0.661	-4.01625e-05
-0.662	-4.06818e-05
-0.663	-4.11696e-05
-0.664	-4.16732e-05
-0.665	-4.21925e-05
-0.666	-4.26803e-05
-0.667	-4.31524e-05
-0.668	-4.3656e-05
-0.669	-4.41281e-05
-0.67	-4.45687e-05
-0.671	-4.49936e-05
-0.672	-4.54342e-05
-0.673	-4.58433e-05
-0.674	-4.62997e-05
-0.675	-4.66774e-05
-0.676	-4.71022e-05
-0.677	-4.75114e-05
-0.678	-4.78733e-05
-0.679	-4.82667e-05
-0.68	-4.86601e-05
-0.681	-4.90221e-05
-0.682	-4.93368e-05
-0.683	-4.96987e-05
-0.684	-4.99977e-05
-0.685	-5.03439e-05
-0.686	-5.06744e-05
-0.687	-5.09419e-05
-0.688	-5.12252e-05
-0.689	-5.15242e-05
-0.69	-5.17445e-05
-0.691	-5.2012e-05
-0.692	-5.22795e-05
-0.693	-5.25155e-05
-0.694	-5.27201e-05
-0.695	-5.29404e-05
-0.696	-5.31293e-05
-0.697	-5.33024e-05
-0.698	-5.34912e-05
-0.699	-5.36171e-05
-0.7	-5.38059e-05
-0.701	-5.39476e-05
-0.702	-5.40734e-05
-0.703	-5.41679e-05
-0.704	-5.4278e-05
-0.705	-5.44039e-05
-0.706	-5.44826e-05
-0.707	-5.45455e-05
-0.708	-5.46242e-05
-0.709	-5.46872e-05
-0.71	-5.47186e-05
-0.711	-5.47658e-05
-0.712	-5.47501e-05
-0.713	-5.47973e-05
-0.714	-5.47816e-05
-0.715	-5.47501e-05
-0.716	-5.47344e-05
-0.717	-5.47029e-05
-0.718	-5.46714e-05
-0.719	-5.464e-05
-0.72	-5.46085e-05
-0.721	-5.45141e-05
-0.722	-5.44511e-05
-0.723	-5.43567e-05
-0.724	-5.4278e-05
-0.725	-5.41679e-05
-0.726	-5.4042e-05
-0.727	-5.39476e-05
-0.728	-5.38374e-05
-0.729	-5.37272e-05
-0.73	-5.35856e-05
-0.731	-5.34597e-05
-0.732	-5.33024e-05
-0.733	-5.31607e-05
-0.734	-5.30034e-05
-0.735	-5.2846e-05
-0.736	-5.26886e-05
-0.737	-5.25313e-05
-0.738	-5.23424e-05
-0.739	-5.21693e-05
-0.74	-5.19962e-05
-0.741	-5.18704e-05
-0.742	-5.165e-05
-0.743	-5.14612e-05
-0.744	-5.12566e-05
-0.745	-5.10678e-05
-0.746	-5.08632e-05
-0.747	-5.06901e-05
-0.748	-5.05013e-05
-0.749	-5.03125e-05
-0.75	-5.00921e-05
-0.751	-4.99033e-05
-0.752	-4.97302e-05
-0.753	-4.95256e-05
-0.754	-4.93211e-05
-0.755	-4.91165e-05
-0.756	-4.89119e-05
-0.757	-4.87231e-05
-0.758	-4.85342e-05
-0.759	-4.83297e-05
-0.76	-4.81251e-05
-0.761	-4.79363e-05
-0.762	-4.77632e-05
-0.763	-4.75429e-05
-0.764	-4.7354e-05
-0.765	-4.71652e-05
-0.766	-4.69763e-05
-0.767	-4.67875e-05
-0.768	-4.65987e-05
-0.769	-4.64098e-05
-0.77	-4.62367e-05
-0.771	-4.60479e-05
-0.772	-4.58591e-05
-0.773	-4.5686e-05
-0.774	-4.55129e-05
-0.775	-4.53398e-05
-0.776	-4.51509e-05
-0.777	-4.49778e-05
-0.778	-4.48205e-05
-0.779	-4.46631e-05
-0.78	-4.449e-05
-0.781	-4.43326e-05
-0.782	-4.41753e-05
-0.783	-4.40336e-05
-0.784	-4.38763e-05
-0.785	-4.36874e-05
-0.786	-4.35616e-05
-0.787	-4.33727e-05
-0.788	-4.32468e-05
-0.789	-4.30895e-05
-0.79	-4.29321e-05
-0.791	-4.28062e-05
-0.792	-4.26646e-05
-0.793	-4.25387e-05
-0.794	-4.23971e-05
-0.795	-4.22712e-05
-0.796	-4.21453e-05
-0.797	-4.20194e-05
-0.798	-4.18935e-05
-0.799	-4.17676e-05
-0.8	-4.16417e-05
-0.799	-4.09808e-05
-0.798	-4.04772e-05
-0.797	-4.00209e-05
-0.796	-3.96117e-05
-0.795	-3.92498e-05
-0.794	-3.88879e-05
-0.793	-3.85574e-05
-0.792	-3.82269e-05
-0.791	-3.79279e-05
-0.79	-3.76289e-05
-0.789	-3.73614e-05
-0.788	-3.70624e-05
-0.787	-3.68107e-05
-0.786	-3.65431e-05
-0.785	-3.62914e-05
-0.784	-3.60396e-05
-0.783	-3.57406e-05
-0.782	-3.55517e-05
-0.781	-3.53157e-05
-0.78	-3.50639e-05
-0.779	-3.48436e-05
-0.778	-3.46076e-05
-0.777	-3.43873e-05
-0.776	-3.41669e-05
-0.775	-3.39466e-05
-0.774	-3.37106e-05
-0.773	-3.3506e-05
-0.772	-3.32857e-05
-0.771	-3.30654e-05
-0.77	-3.28608e-05
-0.769	-3.26405e-05
-0.768	-3.24359e-05
-0.767	-3.22314e-05
-0.766	-3.20111e-05
-0.765	-3.18222e-05
-0.764	-3.16019e-05
-0.763	-3.13973e-05
-0.762	-3.11928e-05
-0.761	-3.09882e-05
-0.76	-3.07836e-05
-0.759	-3.05791e-05
-0.758	-3.03745e-05
-0.757	-3.01542e-05
-0.756	-2.99653e-05
-0.755	-2.9745e-05
-0.754	-2.95405e-05
-0.753	-2.93359e-05
-0.752	-2.91156e-05
-0.751	-2.8911e-05
-0.75	-2.86907e-05
-0.749	-2.84861e-05
-0.748	-2.82815e-05
-0.747	-2.8077e-05
-0.746	-2.78724e-05
-0.745	-2.76363e-05
-0.744	-2.74318e-05
-0.743	-2.72115e-05
-0.742	-2.69754e-05
-0.741	-2.67551e-05
-0.74	-2.65348e-05
-0.739	-2.62988e-05
-0.738	-2.60784e-05
-0.737	-2.58424e-05
-0.736	-2.56064e-05
-0.735	-2.5386e-05
-0.734	-2.51343e-05
-0.733	-2.48982e-05
-0.732	-2.46464e-05
-0.731	-2.44104e-05
-0.73	-2.41586e-05
-0.729	-2.38911e-05
-0.728	-2.3655e-05
-0.727	-2.34033e-05
-0.726	-2.31515e-05
-0.725	-2.28682e-05
-0.724	-2.26164e-05
-0.723	-2.23489e-05
-0.722	-2.20657e-05
-0.721	-2.17982e-05
-0.72	-2.15306e-05
-0.719	-2.12474e-05
-0.718	-2.09641e-05
-0.717	-2.06494e-05
-0.716	-2.03661e-05
-0.715	-2.00514e-05
-0.714	-1.98154e-05
-0.713	-1.94692e-05
-0.712	-1.91702e-05
-0.711	-1.88555e-05
-0.71	-1.85407e-05
-0.709	-1.8226e-05
-0.708	-1.78955e-05
-0.707	-1.75808e-05
-0.706	-1.72503e-05
-0.705	-1.69199e-05
-0.704	-1.65737e-05
-0.703	-1.62275e-05
-0.702	-1.58813e-05
-0.701	-1.54879e-05
-0.7	-1.51574e-05
-0.699	-1.47955e-05
-0.698	-1.44335e-05
-0.697	-1.40873e-05
-0.696	-1.36939e-05
-0.695	-1.3332e-05
-0.694	-1.29386e-05
-0.693	-1.25609e-05
-0.692	-1.21675e-05
-0.691	-1.17741e-05
-0.69	-1.13807e-05
-0.689	-1.09715e-05
-0.688	-1.05624e-05
-0.687	-1.01532e-05
-0.686	-9.72837e-06
-0.685	-9.31922e-06
-0.684	-8.89434e-06
-0.683	-8.45372e-06
-0.682	-8.02884e-06
-0.681	-7.65117e-06
-0.68	-7.1476e-06
-0.679	-6.69125e-06
-0.678	-6.26637e-06
-0.677	-5.82575e-06
-0.676	-5.35366e-06
-0.675	-4.8973e-06
-0.674	-4.44095e-06
-0.673	-3.96886e-06
-0.672	-3.44956e-06
-0.671	-3.04041e-06
-0.67	-2.55258e-06
-0.669	-2.08049e-06
-0.668	-1.59267e-06
-0.667	-1.12057e-06
-0.666	-6.32748e-07
-0.665	-1.60657e-07
-0.664	3.11434e-07
-0.663	8.46471e-07
-0.662	1.35003e-06
-0.661	1.83786e-06
-0.66	2.34143e-06
-0.659	2.86073e-06
-0.658	3.36429e-06
-0.657	3.86785e-06
-0.656	4.38715e-06
-0.655	4.89072e-06
-0.654	5.42575e-06
-0.653	5.92932e-06
-0.652	6.44862e-06
-0.651	6.96792e-06
-0.65	7.48722e-06
-0.649	8.00652e-06
-0.648	8.54155e-06
-0.647	9.04512e-06
-0.646	9.56442e-06
-0.645	1.00837e-05
-0.644	1.0603e-05
-0.643	1.11381e-05
-0.642	1.16574e-05
-0.641	1.21609e-05
-0.64	1.26802e-05
-0.639	1.31995e-05
-0.638	1.37031e-05
-0.637	1.42224e-05
-0.636	1.47259e-05
-0.635	1.52295e-05
-0.634	1.57331e-05
-0.633	1.62209e-05
-0.632	1.67245e-05
-0.631	1.72123e-05
-0.63	1.77159e-05
-0.629	1.82037e-05
-0.628	1.86758e-05
-0.627	1.91479e-05
-0.626	1.96357e-05
-0.625	2.0092e-05
-0.624	2.06113e-05
-0.623	2.10048e-05
-0.622	2.14454e-05
-0.621	2.1886e-05
-0.62	2.23109e-05
-0.619	2.27515e-05
-0.618	2.31606e-05
-0.617	2.3554e-05
-0.616	2.39632e-05
-0.615	2.43566e-05
-0.614	2.47028e-05
-0.613	2.50805e-05
-0.612	2.54424e-05
-0.611	2.57886e-05
-0.61	2.61191e-05
-0.609	2.64181e-05
-0.608	2.67328e-05
-0.607	2.70318e-05
-0.606	2.73308e-05
-0.605	2.75826e-05
-0.604	2.78343e-05
-0.603	2.80546e-05
-0.602	2.82592e-05
-0.601	2.84638e-05
-0.6	2.86841e-05
-0.599	2.88415e-05
-0.598	2.89516e-05
-0.597	2.90932e-05
-0.596	2.92191e-05
-0.595	2.92978e-05
-0.594	2.93765e-05
-0.593	2.94237e-05
-0.592	2.94552e-05
-0.591	2.94709e-05
-0.59	2.94709e-05
-0.589	2.94394e-05
-0.588	2.93765e-05
-0.587	2.93136e-05
-0.586	2.92349e-05
-0.585	2.9109e-05
-0.584	2.89988e-05
-0.583	2.88415e-05
-0.582	2.8747e-05
-0.581	2.84953e-05
-0.58	2.83064e-05
-0.579	2.81019e-05
-0.578	2.78815e-05
-0.577	2.76455e-05
-0.576	2.74095e-05
-0.575	2.71419e-05
-0.574	2.68587e-05
-0.573	2.66069e-05
-0.572	2.63079e-05
-0.571	2.60089e-05
-0.57	2.57257e-05
-0.569	2.54109e-05
-0.568	2.51119e-05
-0.567	2.47815e-05
-0.566	2.44825e-05
-0.565	2.41835e-05
-0.564	2.38688e-05
-0.563	2.35855e-05
-0.562	2.32708e-05
-0.561	2.29561e-05
-0.56	2.26728e-05
-0.559	2.23738e-05
-0.558	2.20748e-05
-0.557	2.17916e-05
-0.556	2.15083e-05
-0.555	2.12251e-05
-0.554	2.09575e-05
-0.553	2.07058e-05
-0.552	2.04068e-05
-0.551	2.0155e-05
-0.55	1.98875e-05
-0.549	1.96514e-05
-0.548	1.93839e-05
-0.547	1.91479e-05
-0.546	1.89118e-05
-0.545	1.86915e-05
-0.544	1.84555e-05
-0.543	1.82509e-05
-0.542	1.80148e-05
-0.541	1.78103e-05
-0.54	1.76057e-05
-0.539	1.74169e-05
-0.538	1.71966e-05
-0.537	1.70077e-05
-0.536	1.68031e-05
-0.535	1.66458e-05
-0.534	1.64255e-05
-0.533	1.62681e-05
-0.532	1.6095e-05
-0.531	1.59219e-05
-0.53	1.57488e-05
-0.529	1.55914e-05
-0.528	1.54341e-05
-0.527	1.52767e-05
-0.526	1.51194e-05
-0.525	1.49777e-05
-0.524	1.48204e-05
-0.523	1.46787e-05
-0.522	1.45371e-05
-0.521	1.44112e-05
-0.52	1.42696e-05
-0.519	1.4128e-05
-0.518	1.39863e-05
-0.517	1.38604e-05
-0.516	1.37346e-05
-0.515	1.36244e-05
-0.514	1.34985e-05
-0.513	1.33726e-05
-0.512	1.32625e-05
-0.511	1.31366e-05
-0.51	1.30264e-05
-0.509	1.29005e-05
-0.508	1.28061e-05
-0.507	1.27274e-05
-0.506	1.2633e-05
-0.505	1.24914e-05
-0.504	1.23812e-05
-0.503	1.22868e-05
-0.502	1.21767e-05
-0.501	1.20822e-05
-0.5	1.19721e-05
-0.499	1.18777e-05
-0.498	1.17832e-05
-0.497	1.16888e-05
-0.496	1.15944e-05
-0.495	1.15157e-05
-0.494	1.1437e-05
-0.493	1.13426e-05
-0.492	1.12639e-05
-0.491	1.11695e-05
-0.49	1.10908e-05
-0.489	1.09964e-05
-0.488	1.09177e-05
-0.487	1.08391e-05
-0.486	1.07604e-05
-0.485	1.06817e-05
-0.484	1.0603e-05
-0.483	1.05243e-05
-0.482	1.04614e-05
-0.481	1.03827e-05
-0.48	1.03198e-05
-0.479	1.02253e-05
-0.478	1.01624e-05
-0.477	1.00837e-05
-0.476	1.00208e-05
-0.475	9.95783e-06
-0.474	9.87914e-06
-0.473	9.83194e-06
-0.472	9.75325e-06
-0.471	9.69031e-06
-0.47	9.62736e-06
-0.469	9.56442e-06
-0.468	9.50147e-06
-0.467	9.43853e-06
-0.466	9.37558e-06
-0.465	9.31264e-06
-0.464	9.24969e-06
-0.463	9.20248e-06
-0.462	9.13954e-06
-0.461	9.07659e-06
-0.46	9.01364e-06
-0.459	8.9507e-06
-0.458	8.90349e-06
-0.457	8.85628e-06
-0.456	8.7776e-06
-0.455	8.71465e-06
-0.454	8.68318e-06
-0.453	8.6045e-06
-0.452	8.51008e-06
-0.451	8.51008e-06
-0.45	8.4314e-06
-0.449	8.41566e-06
-0.448	8.33698e-06
-0.447	8.33698e-06
-0.446	8.27404e-06
-0.445	8.22683e-06
-0.444	8.17962e-06
-0.443	8.11667e-06
-0.442	8.06946e-06
-0.441	8.00652e-06
-0.44	7.97504e-06
-0.439	7.92783e-06
-0.438	7.88063e-06
-0.437	7.83342e-06
-0.436	7.78621e-06
-0.435	7.739e-06
-0.434	7.70753e-06
-0.433	7.66032e-06
-0.432	7.61311e-06
-0.431	7.58163e-06
-0.43	7.51869e-06
-0.429	7.48722e-06
-0.428	7.44001e-06
-0.427	7.40853e-06
-0.426	7.36133e-06
-0.425	7.32985e-06
-0.424	7.26691e-06
-0.423	7.23543e-06
-0.422	7.18823e-06
-0.421	7.14102e-06
-0.42	7.10954e-06
-0.419	7.07807e-06
-0.418	7.03086e-06
-0.417	6.99939e-06
-0.416	6.95218e-06
-0.415	6.92071e-06
-0.414	6.8735e-06
-0.413	6.82629e-06
-0.412	6.79482e-06
-0.411	6.76334e-06
-0.41	6.73187e-06
-0.409	6.7004e-06
-0.408	6.65319e-06
-0.407	6.62172e-06
-0.406	6.57451e-06
-0.405	6.54303e-06
-0.404	6.51156e-06
-0.403	6.48009e-06
-0.402	6.44862e-06
-0.401	6.40141e-06
-0.4	6.36993e-06
-0.399	6.33846e-06
-0.398	6.30699e-06
-0.397	6.25978e-06
-0.396	6.24404e-06
-0.395	6.19683e-06
-0.394	6.16536e-06
-0.393	6.13389e-06
-0.392	6.10242e-06
-0.391	6.07094e-06
-0.39	6.03947e-06
-0.389	6.008e-06
-0.388	5.97653e-06
-0.387	5.94505e-06
-0.386	5.91358e-06
-0.385	5.88211e-06
-0.384	5.85063e-06
-0.383	5.81916e-06
-0.382	5.78769e-06
-0.381	5.75622e-06
-0.38	5.74048e-06
-0.379	5.69327e-06
-0.378	5.67753e-06
-0.377	5.64606e-06
-0.376	5.61459e-06
-0.375	5.58312e-06
-0.374	5.56738e-06
-0.373	5.53591e-06
-0.372	5.52017e-06
-0.371	5.4887e-06
-0.37	5.45723e-06
-0.369	5.42575e-06
-0.368	5.39428e-06
-0.367	5.36281e-06
-0.366	5.34707e-06
-0.365	5.3156e-06
-0.364	5.29986e-06
-0.363	5.26839e-06
-0.362	5.23692e-06
-0.361	5.20544e-06
-0.36	5.17397e-06
-0.359	5.15823e-06
-0.358	5.12676e-06
-0.357	5.09529e-06
-0.356	5.07955e-06
-0.355	5.06382e-06
-0.354	5.01661e-06
-0.353	5.00087e-06
-0.352	4.9694e-06
-0.351	4.95366e-06
-0.35	4.92219e-06
-0.349	4.90645e-06
-0.348	4.87498e-06
-0.347	4.84351e-06
-0.346	4.82777e-06
-0.345	4.7963e-06
-0.344	4.76483e-06
-0.343	4.74909e-06
-0.342	4.71762e-06
-0.341	4.70188e-06
-0.34	4.67041e-06
-0.339	4.67041e-06
-0.338	4.63893e-06
-0.337	4.63893e-06
-0.336	4.52878e-06
-0.335	4.51304e-06
-0.334	4.54452e-06
-0.333	4.46583e-06
-0.332	4.4501e-06
-0.331	4.49731e-06
-0.33	4.48157e-06
-0.329	4.43436e-06
-0.328	4.41863e-06
-0.327	4.35568e-06
-0.326	4.37142e-06
-0.325	4.33994e-06
-0.324	4.32421e-06
-0.323	4.277e-06
-0.322	4.26126e-06
-0.321	4.22979e-06
-0.32	4.22979e-06
-0.319	4.19832e-06
-0.318	4.16684e-06
-0.317	4.15111e-06
-0.316	4.13537e-06
-0.315	4.11963e-06
-0.314	4.08816e-06
-0.313	4.07243e-06
-0.312	4.05669e-06
-0.311	4.02522e-06
-0.31	4.00948e-06
-0.309	3.97801e-06
-0.308	3.96227e-06
-0.307	3.94653e-06
-0.306	3.91506e-06
-0.305	3.89933e-06
-0.304	3.88359e-06
-0.303	3.86785e-06
-0.302	3.83638e-06
-0.301	3.82064e-06
-0.3	3.80491e-06
-0.299	3.77343e-06
-0.298	3.7577e-06
-0.297	3.74196e-06
-0.296	3.72623e-06
-0.295	3.69475e-06
-0.294	3.67902e-06
-0.293	3.66328e-06
-0.292	3.64754e-06
-0.291	3.63181e-06
-0.29	3.61607e-06
-0.289	3.60033e-06
-0.288	3.5846e-06
-0.287	3.56886e-06
-0.286	3.53739e-06
-0.285	3.53739e-06
-0.284	3.50592e-06
-0.283	3.49018e-06
-0.282	3.47444e-06
-0.281	3.45871e-06
-0.28	3.44297e-06
-0.279	3.42723e-06
-0.278	3.4115e-06
-0.277	3.38003e-06
-0.276	3.38003e-06
-0.275	3.34855e-06
-0.274	3.33282e-06
-0.273	3.31708e-06
-0.272	3.30134e-06
-0.271	3.28561e-06
-0.27	3.26987e-06
-0.269	3.25413e-06
-0.268	3.25413e-06
-0.267	3.22266e-06
-0.266	3.20693e-06
-0.265	3.20693e-06
-0.264	3.17545e-06
-0.263	3.15972e-06
-0.262	3.15972e-06
-0.261	3.14398e-06
-0.26	3.12824e-06
-0.259	3.09677e-06
-0.258	3.08103e-06
-0.257	3.08103e-06
-0.256	3.0653e-06
-0.255	3.04956e-06
-0.254	3.03383e-06
-0.253	3.01809e-06
-0.252	3.00235e-06
-0.251	2.98662e-06
-0.25	2.97088e-06
-0.249	2.97088e-06
-0.248	2.95514e-06
-0.247	2.93941e-06
-0.246	2.92367e-06
-0.245	2.90793e-06
-0.244	2.90793e-06
-0.243	2.87646e-06
-0.242	2.86073e-06
-0.241	2.84499e-06
-0.24	2.84499e-06
-0.239	2.82925e-06
-0.238	2.82925e-06
-0.237	2.79778e-06
-0.236	2.79778e-06
-0.235	2.78204e-06
-0.234	2.76631e-06
-0.233	2.76631e-06
-0.232	2.75057e-06
-0.231	2.73483e-06
-0.23	2.7191e-06
-0.229	2.7191e-06
-0.228	2.70336e-06
-0.227	2.68763e-06
-0.226	2.68763e-06
-0.225	2.65615e-06
-0.224	2.65615e-06
-0.223	2.64042e-06
-0.222	2.64042e-06
-0.221	2.62468e-06
-0.22	2.60894e-06
-0.219	2.60894e-06
-0.218	2.59321e-06
-0.217	2.57747e-06
-0.216	2.57747e-06
-0.215	2.56173e-06
-0.214	2.56173e-06
-0.213	2.546e-06
-0.212	2.53026e-06
-0.211	2.53026e-06
-0.21	2.51453e-06
-0.209	2.49879e-06
-0.208	2.49879e-06
-0.207	2.48305e-06
-0.206	2.48305e-06
-0.205	2.46732e-06
-0.204	2.45158e-06
-0.203	2.45158e-06
[truncated: 802 more rows]
